# Supplementary material for: Marine or freshwater: the role of ornamental fish keeper’s preferences in the conservation of aquatic organisms in Brazil
Source: PeerJ. 2022 Nov 11;10:e14387. doi: 10.7717/peerj.14387 (PMC9661971; doi:10.7717/peerj.14387)
Supplement: Supplemental Information 1 [file peerj-10-14387-s001.xlsx]

## Sheet: Planilha1
Interviewee	Date/time	You consider yourself...	How long have you been creating ornamental fish?	What motivated you to choose fish as pets?	Do you have marine or freshwater fish?	What do you consider most important when purchasing a new animal for your aquarium?	Do you prefer to acquire animals from which source?	How much on average is your monthly expense with the hobby/maintenance of the aquarium?	How many fish do you have these days?	How many species of fish?	Do you have invertebrates in your aquarium? If so, which ones?	Where do you usually get your fish?	When you buy fish, do you request the invoice from the seller?	Have any of the animals you own been captured by you? If so, which animal? How was it captured? Where was he captured?	What is the frequency of care (cleaning) with the aquarium/tank?	Have you ever been able to breed any animals?	If your fish ever bred, what did you do with the young?	Has any animals ever been sick?	When you want to get rid of an animal, what fate do you give it?	Have you ever released fish into the wild? If so, where and what was the fish?	Where did you gain experience in aquarism?	Qual das seguintes informações sobre o futuro do comércio/criação de peixes você concorda?	When any animal of yours gets sick, where do you seek treatment?
1	2019-01-10 19:32:41	Hobbysta (ornamental fish breeder only)	More than 10 years ago	Beauty of animals and aquariums	Freshwater	Ease in caring for the animal	Raised in captivity	Less than 100 R$	Between 10 and 20 fish	5	No	Physical shops and petshops, Capture in nature (lakes, rivers, ocean)	No	Yes	Once a month	Yes	Kept in the aquarium	No	I make a donation	No	Trial and error	More fish will be available for trade in the future due to cultivation
2	2019-01-11 18:22:06	Hobbysta (ornamental fish breeder only)	Between 1 and 5 years	Beauty of animals and aquariums	Freshwater	Ease in caring for the animal	Raised in captivity	Less than 100 R$	Between 20 and 50 fish	2	No	Physical shops and petshops	No	No	Once a month	Yes	Kept in the aquarium	Yes	I make a donation		Trial and error, Consult specialized websites	Fewer fish will be available for trade in the future due to excessive catch and loss of natural habitats
3	2019-01-12 19:49:58	Hobbysta (ornamental fish breeder only)	Between 1 and 5 years	Beauty of animals and aquariums	Freshwater	Aesthetics of the animal	Raised in captivity	Less than 100 R$	Less than 5 fish	2	No	Physical shops and petshops, Aquarism groups on Facebook	No	Yes	Once a month	Yes	Kept in the aquarium	Yes	Release in nature	Yes	aquarism forums, Internet searches (google, blogs), Trial and error	More fish will be available for trade in the future due to cultivation
4	2019-01-13 23:39:13	Hobbysta (ornamental fish breeder only)	Between 1 and 5 years	Therapy/depression/anxiety/calm	Freshwater	Origin of the animal	Raised in captivity	Less than 100 R$	Less than 5 fish	1	No	Physical shops and petshops	Yes	No	Once a week	No	No	No	Trade with other hobbyists for other fish or aquarium equipment	No	Internet searches (google, blogs), Book consultation and specific literature, Consult specialized websites	Fewer fish will be available for trade in the future due to excessive catch and loss of natural habitats
5	2019-01-14 17:38:52	Hobbysta (ornamental fish breeder only)	Between 1 and 5 years	Interest in ecology and biology (development) of animals/challenge in creating an ecosystem	Freshwater	Animal behavior	Raised in captivity	Between 100 and 500 R$	Between 10 and 20 fish	4	No	Physical shops and petshops, Buy directly from suppliers	No	No	More than once a week	Yes	You've given it to another aquarist	Yes	Sell		Trial and error	Fewer fish will be available for trade in the future due to excessive catch and loss of natural habitats
6	2019-01-14 19:26:18	Seller	Since my childhood	Commercial interest - in addition to creating, you sell ornamental fish	Freshwater	Aesthetics of the animal	Raised in captivity	Between 100 and 500 R$	Between 20 and 50 fish	3	Yes	Buy directly from suppliers	No	No	Once a month	Yes	Sold	Yes	Sell		External access	More fish will be available for trade in the future due to cultivation
7	2019-01-14 19:39:51	Hobbysta (ornamental fish breeder only)	Since my childhood	Beauty of animals and aquariums	Freshwater	Aesthetics of the animal	Raised in captivity	I don't spend anything	Between 20 and 50 fish	0	No	Physical shops and petshops	No	No	Once a month	Yes	Sold	Yes	I never fell apart	No		Fewer fish will be available for trade in the future due to excessive catch and loss of natural habitats
8	2019-01-14 19:49:18	Hobbysta (ornamental fish breeder only)	Between 5 and 10 years	Beauty of animals and aquariums, Behavior - are easy animals to care for, do not make noise	Freshwater	Aesthetics of the animal, Origin of the animal, Behavior of the animal, If the animal provides any function inside the aquarium, Ease in caring for the animal	Raised in captivity	Less than 100 R$	Between 10 and 20 fish	6	No	Physical shops and petshops, Aquarism groups on Facebook	No	No	Once a month	Yes	You've given it to another aquarist	Yes	Trade with other hobbyists for other fish or aquarium equipment		Internet searches (google, blogs), Trial and error, Book consultation and specific literature	More fish will be available for trade in the future due to cultivation
9	2019-01-14 20:07:13	Hobbysta (ornamental fish breeder only)	Since my childhood	Beauty of animals and aquariums	Freshwater	Aesthetics of the animal, Origin of the animal, If the animal provides any function inside the aquarium	Raised in captivity	Less than 100 R$	Between 5 and 10 fish	1	No	Physical shops and petshops	No	No	Once a month	No	No	No	Trade with other hobbyists for other fish or aquarium equipment	No	Consult specialized websites	More fish will be available for trade in the future due to cultivation
10	2019-01-15 22:14:29	Hobbysta (ornamental fish breeder only)	Between 5 and 10 years	Beauty of animals and aquariums	Freshwater	Behavior of the animal, If the animal provides any function inside the aquarium	Raised in captivity	Less than 100 R$	Between 5 and 10 fish	3	No	Physical shops and petshops, Buy directly from suppliers	No	No	Once every 15 days	Yes	You've given it to another aquarist	No	Trade with other hobbyists for other fish or aquarium equipment	No	Internet searches (google, blogs), Trial and error	Fewer fish will be available for trade in the future due to excessive catch and loss of natural habitats
11	2019-01-15 23:52:03	Hobbysta (ornamental fish breeder only)	Less than 1 year ago	Behavior - are easy animals to care for, do not make noise	Freshwater	Behavior of the animal, If the animal provides any function inside the aquarium, Ease in caring for the animal	Raised in captivity	Less than 100 R$	Less than 5 fish	3	Yes	Physical shops and petshops, Aquarism groups on Facebook	No	No	Once every 15 days	Yes	Kept in the aquarium	No	I make a donation		aquarism forums, Trial and error	More fish will be available for trade in the future due to cultivation
12	2019-01-16 23:02:55	Hobbysta (ornamental fish breeder only)	Between 5 and 10 years	Beauty of animals and aquariums	Freshwater	Animal behavior	Raised in captivity	Less than 100 R$	Less than 5 fish	1	No	Buy directly from suppliers	No	No	Once a month	Yes	You've given it to another aquarist	Yes	Trade with other hobbyists for other fish or aquarium equipment	No	aquarism forums, Internet searches (google, blogs), Trial and error	More fish will be available for trade in the future due to cultivation
13	2019-01-16 23:57:29	Seller	More than 10 years ago	Beauty of animals and aquariums	Freshwater	Origin of the animal	Raised in captivity	Between 100 and 500 R$	Between 500 and 1000 fish	9	No	Buy directly from suppliers	Yes	No	More than once a week	Yes	Sold	Yes	Sell		Of everything a little	More fish will be available for trade in the future due to cultivation
14	2019-01-17 17:18:54	Hobbysta (ornamental fish breeder only)	Between 1 and 5 years	Behavior - are easy animals to care for, do not make noise	Freshwater	Origin of the animal, Animal behavior, Ease in caring for the animal	Raised in captivity	Less than 100 R$	Between 20 and 50 fish	2	No	Physical shops and petshops	No	No	Once a month	Yes	Kept in the aquarium	No	I never fell apart	No	aquarism forums, Internet searches (google, blogs), Consult specialized websites	More fish will be available for trade in the future due to cultivation
15	2019-01-18 20:35:27	Hobbysta (ornamental fish breeder only)	Since my childhood	Beauty of animals and aquariums	Freshwater	Aesthetics of the animal, Origin of the animal	Raised in captivity	Between 100 and 500 R$	Between 20 and 50 fish	8	No	Physical shops and petshops, Online stores (free market, olx, aquarium store websites), Aquarism groups on Facebook, Buy directly from suppliers	No	No	Once every 15 days	Yes	Sold	Yes	Trade with other hobbyists for other fish or aquarium equipment	No	Internet searches (google, blogs), Book consultation and specific literature, Consult specialized websites	More fish will be available for trade in the future due to cultivation
16	2019-01-19 11:30:35	Hobbysta (ornamental fish breeder only)	Between 1 and 5 years	Beauty of animals and aquariums	Freshwater	Aesthetics of the animal	Raised in captivity	Less than 100 R$	Between 5 and 10 fish	2	No	Physical shops and petshops	No	No	Once every 15 days	No		Yes	I make a donation	No	aquarism forums, Internet searches (google, blogs)	More fish will be available for trade in the future due to cultivation
17	2019-01-19 15:24:43	Hobbysta (ornamental fish breeder only)	Between 5 and 10 years	Beauty of animals and aquariums	Freshwater	Aesthetics of the animal, Animal behavior	Raised in captivity	Between 100 and 500 R$	Between 10 and 20 fish	3	No	Physical shops and petshops, Buy directly from suppliers	No	No	Once every 15 days	No		Yes	Sell	Yes	aquarism forums, Internet searches (google, blogs), Book consultation and specific literature, Consult specialized websites	Fewer fish will be available for trade in the future due to excessive catch and loss of natural habitats
18	2019-01-19 16:04:34	Hobbysta (ornamental fish breeder only)	Between 5 and 10 years	Beauty of animals and aquariums, Encouragement, recommendation or inheritance of friends or family	Freshwater	Origin of the animal, Behavior of the animal, If the animal provides any function inside the aquarium	Raised in captivity	Between 100 and 500 R$	Between 10 and 20 fish	5	No	Physical shops and petshops, Aquarism groups on Facebook, Buy directly from suppliers	Yes	No	Once every 15 days	Yes	Kept in the aquarium	Yes	Trade with other hobbyists for other fish or aquarium equipment	No	aquarism forums, Internet searches (google, blogs), Trial and error, Book consultation and specific literature, Consult specialized websites	More fish will be available for trade in the future due to cultivation
19	2019-01-19 17:18:49	Hobbysta and Seller	Since my childhood	Commercial interest - in addition to creating, you sell ornamental fish, Beauty of animals and aquariums	Freshwater	Aesthetics of the animal	Raised in captivity	Between 100 and 500 R$	Between 20 and 50 fish	13	Yes	Buy directly from suppliers	Yes	No	Once a week	Yes	Sold	Yes	Sell		Internet searches (google, blogs), External access, Trial and error, Consult specialized websites	More fish will be available for trade in the future due to cultivation
20	2019-01-20 11:42:34	Hobbysta (ornamental fish breeder only)	Between 5 and 10 years	Beauty of animals and aquariums	Freshwater	Aesthetics of the animal	Raised in captivity	Less than 100 R$	Between 10 and 20 fish	5	No	Physical shops and petshops	No	Yes	Once a week	Yes	Kept in the aquarium	Yes	Release in nature	Yes	Internet searches (google, blogs)	More fish will be available for trade in the future due to cultivation
21	2019-01-20 12:00:49	Hobbysta and Seller	More than 10 years ago	Beauty of animals and aquariums	Marine	Shop/seller recommendation, Origin of the animal, Behavior of the animal, If the animal provides any function inside the aquarium	Wild caught in nature	Less than 100 R$	Between 5 and 10 fish	6	Yes	Physical shops and petshops	Yes	No	Once a month	Yes	Swapped with another aquarist for another fish	Yes	Trade with other hobbyists for other fish or aquarium equipment	No	aquarism forums, Courses, External access, Book consultation and specific literature, Consult specialized websites	Fewer fish will be available for trade in the future due to excessive catch and loss of natural habitats
22	2019-01-21 10:23:06	Hobbysta (ornamental fish breeder only)	Since my childhood	Beauty of animals and aquariums	Freshwater	Animal price, Shop/seller recommendation, Aesthetics of the animal, Origin of the animal, Behavior of the animal, If the animal provides any function inside the aquarium, Ease in caring for the animal	Raised in captivity	Less than 100 R$	Between 5 and 10 fish	3	No	Physical shops and petshops, Aquarism groups on Facebook	No	No	Once a month	Yes	died	Yes	Trade with other hobbyists for other fish or aquarium equipment	No	aquarism forums, Internet searches (google, blogs), Trial and error, Book consultation and specific literature, Consult specialized websites	More fish will be available for trade in the future due to cultivation
23	2019-01-21 10:32:24	Hobbysta (ornamental fish breeder only)	Since my childhood	Beauty of animals and aquariums	Freshwater	Compatibility with my aquarium and my fauna	Raised in captivity	Between 100 and 500 R$	Between 20 and 50 fish	7	No	Buy directly from suppliers	No	No	Once a week	Yes	Kept in the aquarium	Yes	Trade with other hobbyists for other fish or aquarium equipment	No	Book consultation and specific literature	More fish will be available for trade in the future due to cultivation
24	2019-01-21 11:00:20	Hobbysta and Seller	More than 10 years ago	Encouragement, recommendation or inheritance of friends or family	Freshwater	Origin of the animal	Indifferent	More than 2 thousand R$	Between 20 and 50 fish	0	No	Physical shops and petshops, Online stores (free market, olx, aquarium store websites), Aquarism groups on Facebook, Buy directly from suppliers, Capture in nature (lakes, rivers, ocean)	No	No	Once a week	Yes	Sold	Yes	Sell	No	aquarism forums, Courses, Trial and error, Book consultation and specific literature	More fish will be available for trade in the future due to cultivation
25	2019-01-21 11:01:00	Hobbysta (ornamental fish breeder only)	Since my childhood	Beauty of animals and aquariums	Freshwater	Origin of the animal	Raised in captivity	Between 100 and 500 R$	Between 20 and 50 fish	4	Yes	Physical shops and petshops	Yes	No	Once a month	Yes	Kept in the aquarium	Yes	I make a donation	No	aquarism forums, External access	More fish will be available for trade in the future due to cultivation
26	2019-01-21 11:02:13	Hobbysta and Seller	Between 1 and 5 years	Commercial interest - in addition to creating, you sell ornamental fish	Freshwater	animal genetics	Raised in captivity	Between 100 and 500 R$	Less than 5 fish	2	Yes	Physical shops and petshops	No	No	More than once a week	Yes	Kept in the aquarium	Yes	Sell	No	Courses, Book consultation and specific literature	More fish will be available for trade in the future due to cultivation
27	2019-01-21 11:03:48	Hobbysta and Seller	Between 1 and 5 years	Beauty of animals and aquariums	Freshwater	Aesthetics of the animal	Raised in captivity	Between 100 and 500 R$	Between 5 and 10 fish	1	Yes	Physical shops and petshops	No	No	Once a month	Yes	Kept in the aquarium	No	I make a donation		Internet searches (google, blogs)	More fish will be available for trade in the future due to cultivation
28	2019-01-21 11:08:14	Hobbysta (ornamental fish breeder only)	Since my childhood	Beauty of animals and aquariums	Freshwater	If the animal provides any function inside the aquarium, Ease in caring for the animal	Raised in captivity	Less than 100 R$	Between 10 and 20 fish	6	Yes	Physical shops and petshops	No	No	Once a week	Yes	You've given it to another aquarist	Yes	Trade with other hobbyists for other fish or aquarium equipment	No	aquarism forums, Internet searches (google, blogs), Book consultation and specific literature, Consult specialized websites	Fewer fish will be available for trade in the future due to excessive catch and loss of natural habitats
29	2019-01-21 11:17:44	Hobbysta (ornamental fish breeder only)	Between 5 and 10 years	Beauty of animals and aquariums	Freshwater	Aesthetics of the animal, Animal behavior, Ease in caring for the animal	Raised in captivity	Between 100 and 500 R$	Between 5 and 10 fish	4	Yes	Physical shops and petshops, Online stores (free market, olx, aquarium store websites), Buy directly from suppliers	No	No	Once every 15 days	Yes	You've given it to another aquarist	No	I make a donation	No	aquarism forums, Internet searches (google, blogs), Trial and error, Book consultation and specific literature, Consult specialized websites	More fish will be available for trade in the future due to cultivation
30	2019-01-21 11:20:05	Hobbysta (ornamental fish breeder only)	Between 1 and 5 years	Beauty of animals and aquariums	Freshwater	Animal price, Aesthetics of the animal, Behavior of the animal, If the animal provides any function inside the aquarium	Raised in captivity	Between 100 and 500 R$	Between 20 and 50 fish	2	No	Physical shops and petshops	No	No	Once a week	Yes	Kept in the aquarium	Yes	I make a donation	No	aquarism forums	More fish will be available for trade in the future due to cultivation
31	2019-01-21 11:21:33	Hobbysta (ornamental fish breeder only)	Between 5 and 10 years	Beauty of animals and aquariums	Freshwater	Aesthetics of the animal, Origin of the animal, Behavior of the animal, If the animal provides any function inside the aquarium, Ease in caring for the animal	Raised in captivity	Less than 100 R$	Between 5 and 10 fish	5	Yes	Physical shops and petshops, Aquarism groups on Facebook	No	No	Once a week	Yes	You've given it to another aquarist	No	I make a donation		aquarism forums, Internet searches (google, blogs), Trial and error	More fish will be available for trade in the future due to cultivation
32	2019-01-21 11:23:59	Hobbysta (ornamental fish breeder only)	More than 10 years ago	Beauty of animals and aquariums	Freshwater	Aesthetics of the animal, Animal behavior, Ease in caring for the animal	Raised in captivity	Between 100 and 500 R$	Between 5 and 10 fish	1	Yes	Physical shops and petshops	No	No	Once every 15 days	Yes	Kept in the aquarium	Yes	Trade with other hobbyists for other fish or aquarium equipment		aquarism forums	More fish will be available for trade in the future due to cultivation
33	2019-01-21 11:30:02	Hobbysta (ornamental fish breeder only)	Since my childhood	Beauty of animals and aquariums	Freshwater	If the animal provides any function inside the aquarium, Compatibility with my aquarium and my fauna	Raised in captivity	Between 100 and 500 R$	Between 20 and 50 fish	7	Yes	Physical shops and petshops	Yes	Yes	Once a week	Yes	You've given it to another aquarist	Yes	I make a donation	Yes	aquarism forums, Internet searches (google, blogs), Trial and error, Consult specialized websites, zap	More fish will be available for trade in the future due to cultivation
34	2019-01-21 11:32:35	Hobbysta (ornamental fish breeder only)	More than 10 years ago	Beauty of animals and aquariums, Therapy/depression/anxiety/calm	Freshwater	Aesthetics of the animal, Compatibility with my aquarium and my fauna	Raised in captivity	Between 100 and 500 R$	Between 20 and 50 fish	9	Yes	Physical shops and petshops	No	No	Once a month	Yes	Sold	No	Sell	No	aquarism forums, Courses, Internet searches (google, blogs), Book consultation and specific literature, Consult specialized websites	More fish will be available for trade in the future due to cultivation
35	2019-01-21 11:40:35	Hobbysta (ornamental fish breeder only)	Since my childhood	Beauty of animals and aquariums	Freshwater	Animal behavior	Raised in captivity	Less than 100 R$	Between 20 and 50 fish	9	Yes	Physical shops and petshops, Online stores (free market, olx, aquarium store websites)	No	No	Once every 15 days	Yes	Kept in the aquarium, Donated to other aquarists	Yes	I make a donation		Internet searches (google, blogs), Book consultation and specific literature, Consult specialized websites, Amigos	Fewer fish will be available for trade in the future due to excessive catch and loss of natural habitats
36	2019-01-21 11:47:31	Hobbysta (ornamental fish breeder only)	Since my childhood	Beauty of animals and aquariums	Freshwater	Aesthetics of the animal	Wild caught in nature	Between 100 and 500 R$	Between 20 and 50 fish	4	No	Physical shops and petshops, Online stores (free market, olx, aquarium store websites)	No	No	Once a week	No		Yes	Sell	No	Internet searches (google, blogs)	More fish will be available for trade in the future due to cultivation
37	2019-01-21 11:52:13	Hobbysta (ornamental fish breeder only)	More than 10 years ago	Beauty of animals and aquariums, Behavior - are easy animals to care for, do not make noise	Freshwater	Shop/seller recommendation, Aesthetics of the animal, If the animal provides any function inside the aquarium, Ease in caring for the animal	Raised in captivity	Less than 100 R$	Between 20 and 50 fish	6	No	Physical shops and petshops, Aquarism groups on Facebook, Buy directly from suppliers	No	No	Once a month	Yes	Kept in the aquarium	Yes	Sell	No	aquarism forums, Internet searches (google, blogs), Trial and error	Fewer fish will be available for trade in the future due to excessive catch and loss of natural habitats
38	2019-01-21 12:07:13	Hobbysta (ornamental fish breeder only)	More than 10 years ago	Beauty of animals and aquariums, Behavior - are easy animals to care for, do not make noise	Freshwater	Animal price, Aesthetics of the animal, Behavior of the animal, If the animal provides any function inside the aquarium, Compatibility with my aquarium and my fauna	Raised in captivity	Between 100 and 500 R$	Between 20 and 50 fish	10	Yes	Physical shops and petshops, Buy directly from suppliers	No	No	Once a week	Yes	Kept in the aquarium	No	I make a donation, Sell, Troco	No	aquarism forums, Internet searches (google, blogs), Trial and error	More fish will be available for trade in the future due to cultivation
39	2019-01-21 12:13:11	Hobbysta (ornamental fish breeder only)	Less than 1 year ago	Beauty of animals and aquariums	Freshwater	Animal behavior	Raised in captivity	Between 100 and 500 R$	Between 20 and 50 fish	5	Yes	Physical shops and petshops	No	No	Once a week	Yes	Kept in the aquarium	No	I make a donation	No	aquarism forums, Internet searches (google, blogs), Consult specialized websites	More fish will be available for trade in the future due to cultivation
40	2019-01-21 12:15:57	Hobbysta (ornamental fish breeder only)	More than 10 years ago	Beauty of animals and aquariums	Freshwater	Aesthetics of the animal, Origin of the animal, Behavior of the animal, If the animal provides any function inside the aquarium	Raised in captivity	Less than 100 R$	Between 10 and 20 fish	3	No	Physical shops and petshops, Online stores (free market, olx, aquarium store websites), Aquarism groups on Facebook	No	No	Once a week	No		Yes	Trade with other hobbyists for other fish or aquarium equipment		aquarism forums, Internet searches (google, blogs)	Fewer fish will be available for trade in the future due to excessive catch and loss of natural habitats
41	2019-01-21 12:19:31	Hobbysta (ornamental fish breeder only)	Between 1 and 5 years	Beauty of animals and aquariums	Freshwater	Animal price, Aesthetics of the animal, Animal behavior	Raised in captivity	Less than 100 R$	Between 5 and 10 fish	1	Yes	Physical shops and petshops	No	No	Once a week	Yes	You've given it to another aquarist	No	I make a donation	No	aquarism forums, Internet searches (google, blogs), Consult specialized websites	More fish will be available for trade in the future due to cultivation
42	2019-01-21 12:22:34	Hobbysta (ornamental fish breeder only)	Since my childhood	Beauty of animals and aquariums	Freshwater	Aesthetics of the animal, Behavior of the animal, If the animal provides any function inside the aquarium	Raised in captivity	Less than 100 R$	Less than 5 fish	2	Yes	Physical shops and petshops, Online stores (free market, olx, aquarium store websites)	No	Yes	Once every 15 days	No		Yes	I make a donation	No	aquarism forums, Internet searches (google, blogs), Trial and error, Consult specialized websites	More fish will be available for trade in the future due to cultivation
43	2019-01-21 12:30:17	Hobbysta and Seller	Between 5 and 10 years	Beauty of animals and aquariums, Encouragement, recommendation or inheritance of friends or family	Marine	Behavior of the animal, If the animal provides any function inside the aquarium	Raised in captivity	Less than 100 R$	Between 20 and 50 fish	14	Yes	Physical shops and petshops, Buy directly from suppliers	No	No	Once a week	No		No	Sell		aquarism forums, Courses, Internet searches (google, blogs), External access, Trial and error, Book consultation and specific literature, Consult specialized websites	More fish will be available for trade in the future due to cultivation
44	2019-01-21 12:34:24	Hobbysta (ornamental fish breeder only)	Between 1 and 5 years	Interest in ecology and biology (development) of animals/challenge in creating an ecosystem	Freshwater	If the animal provides any function inside the aquarium, Compatibility with my aquarium and my fauna	Raised in captivity	Between 100 and 500 R$	Between 20 and 50 fish	10	Yes	Physical shops and petshops	No	No	As needed	Yes	Kept in the aquarium	Yes	I make a donation	No	aquarism forums, Internet searches (google, blogs), Trial and error, Book consultation and specific literature, Consult specialized websites	More fish will be available for trade in the future due to cultivation
45	2019-01-21 12:51:53	Hobbysta (ornamental fish breeder only)	Since my childhood	Beauty of animals and aquariums	Freshwater	Aesthetics of the animal	Raised in captivity	Less than 100 R$	Between 5 and 10 fish	4	Yes	Physical shops and petshops	No	No	Once a week	Yes	Kept in the aquarium	Yes	I make a donation		aquarism forums, Internet searches (google, blogs), External access, Trial and error, Book consultation and specific literature, Consult specialized websites	More fish will be available for trade in the future due to cultivation
46	2019-01-21 12:57:44	Hobbysta (ornamental fish breeder only)	Between 1 and 5 years	Beauty of animals and aquariums	Freshwater	Aesthetics of the animal, Behavior of the animal, If the animal provides any function inside the aquarium	Raised in captivity	Between 100 and 500 R$	Between 10 and 20 fish	4	Yes	Physical shops and petshops, Online stores (free market, olx, aquarium store websites), Aquarism groups on Facebook	No	No	More than once a week	Yes	You've given it to another aquarist	Yes	I make a donation		aquarism forums, Internet searches (google, blogs), Trial and error, Book consultation and specific literature, Consult specialized websites	More fish will be available for trade in the future due to cultivation
47	2019-01-21 13:33:09	Hobbysta and Seller	More than 10 years ago	Beauty of animals and aquariums	Freshwater	Aesthetics of the animal, Origin of the animal, Behavior of the animal, If the animal provides any function inside the aquarium, Ease in caring for the animal	Raised in captivity	Less than 100 R$	Between 20 and 50 fish	0	Yes	Physical shops and petshops	No	No	Once a week	Yes	Kept in the aquarium	Yes	I make a donation	No	aquarism forums, Internet searches (google, blogs), Trial and error, Book consultation and specific literature, Consult specialized websites	Fewer fish will be available for trade in the future due to excessive catch and loss of natural habitats
48	2019-01-21 13:39:09	Hobbysta (ornamental fish breeder only)	Between 1 and 5 years	Beauty of animals and aquariums	Freshwater	Aesthetics of the animal, If the animal provides any function inside the aquarium	Raised in captivity	Between 100 and 500 R$	Between 10 and 20 fish	4	No	Physical shops and petshops, Aquarism groups on Facebook	No	No	Once a month	Yes	Kept in the aquarium	No	I make a donation	No	aquarism forums, Internet searches (google, blogs), Consult specialized websites	Fewer fish will be available for trade in the future due to excessive catch and loss of natural habitats
49	2019-01-21 13:50:30	Hobbysta (ornamental fish breeder only)	Less than 1 year ago	Beauty of animals and aquariums	Freshwater	Animal price, Aesthetics of the animal, Origin of the animal, Behavior of the animal, If the animal provides any function inside the aquarium	Raised in captivity	Between 100 and 500 R$	Between 10 and 20 fish	11	No	Physical shops and petshops, Aquarism groups on Facebook, Buy directly from suppliers	No	No	Once a week	Yes	No	Yes	Trade with other hobbyists for other fish or aquarium equipment	No	Internet searches (google, blogs)	Fewer fish will be available for trade in the future due to excessive catch and loss of natural habitats
50	2019-01-21 13:55:51	Hobbysta (ornamental fish breeder only)	Between 1 and 5 years	Beauty of animals and aquariums	Freshwater	Aesthetics of the animal, Origin of the animal, Behavior of the animal, If the animal provides any function inside the aquarium, Ease in caring for the animal	Raised in captivity	Less than 100 R$	Between 10 and 20 fish	6	No	Physical shops and petshops, Online stores (free market, olx, aquarium store websites), Buy directly from suppliers	No	No	Once every 15 days	Yes	No	Yes	I make a donation	No	aquarism forums, Internet searches (google, blogs), Trial and error, Consult specialized websites	Fewer fish will be available for trade in the future due to excessive catch and loss of natural habitats
51	2019-01-21 13:59:54	Hobbysta (ornamental fish breeder only)	Less than 1 year ago	Beauty of animals and aquariums	Freshwater	Behavior of the animal, If the animal provides any function inside the aquarium, Compatibility with my aquarium and my fauna	Raised in captivity	Less than 100 R$	Between 10 and 20 fish	7	Yes	Physical shops and petshops	Yes	No	Once a week	No	No	No	I make a donation	No	aquarism forums, Internet searches (google, blogs), Trial and error, Consult specialized websites	Fewer fish will be available for trade in the future due to excessive catch and loss of natural habitats
52	2019-01-21 14:52:52	Hobbysta (ornamental fish breeder only)	Between 1 and 5 years	Beauty of animals and aquariums	Marine	Shop/seller recommendation, Origin of the animal, Behavior of the animal, If the animal provides any function inside the aquarium	Raised in captivity	Between 100 and 500 R$	Between 5 and 10 fish	3	Yes	Buy directly from suppliers	Yes	No	Once a week	No	No	Yes	Sell		External access	Fewer fish will be available for trade in the future due to excessive catch and loss of natural habitats
53	2019-01-21 15:02:38	Hobbysta and Seller	More than 10 years ago	Beauty of animals and aquariums	Marine	Aesthetics of the animal, Origin of the animal	Raised in captivity	Less than 100 R$	Between 10 and 20 fish	1	No	Physical shops and petshops	No	No	Once every 15 days	Yes	Sold	No	Sell	No	aquarism forums, Internet searches (google, blogs), Trial and error	More fish will be available for trade in the future due to cultivation
54	2019-01-21 15:31:52	Hobbysta (ornamental fish breeder only)	Between 1 and 5 years	Beauty of animals and aquariums	Marine	Animal price, Aesthetics of the animal, Origin of the animal, Behavior of the animal, If the animal provides any function inside the aquarium, Ease in caring for the animal	Raised in captivity	Less than 100 R$	Less than 5 fish	3	No	Physical shops and petshops, Aquarism groups on Facebook	No	No	Once a week	No	Swapped with another aquarist for another fish	Yes	Trade with other hobbyists for other fish or aquarium equipment		Internet searches (google, blogs), Trial and error, Book consultation and specific literature, Consult specialized websites	More fish will be available for trade in the future due to cultivation
55	2019-01-21 16:07:14	Hobbysta (ornamental fish breeder only)	Between 1 and 5 years	Beauty of animals and aquariums	Freshwater	Aesthetics of the animal, Behavior of the animal, If the animal provides any function inside the aquarium	Raised in captivity	Between 100 and 500 R$	Between 20 and 50 fish	8	Yes	Physical shops and petshops, Aquarism groups on Facebook, Buy directly from suppliers	No	No	Once a week	Yes	Kept in the aquarium	Yes	I make a donation	No	aquarism forums, Internet searches (google, blogs), Trial and error	More fish will be available for trade in the future due to cultivation
56	2019-01-21 16:39:35	Hobbysta (ornamental fish breeder only)	Between 1 and 5 years	Beauty of animals and aquariums, Behavior - are easy animals to care for, do not make noise	Freshwater	Origin of the animal, Behavior of the animal, If the animal provides any function inside the aquarium	Raised in captivity	Between 500 and 1,000 R$	Between 500 and 1000 fish	29	No	Aquarism groups on Facebook, Buy directly from suppliers	No	Yes	Once a month	Yes	Kept in the aquarium	Yes	I make a donation	No	Sempre gostei de pescar	Fewer fish will be available for trade in the future due to excessive catch and loss of natural habitats
57	2019-01-21 17:22:06	Hobbysta (ornamental fish breeder only)	Since my childhood	Beauty of animals and aquariums	Freshwater	Aesthetics of the animal, Origin of the animal	Raised in captivity	Between 100 and 500 R$	Between 20 and 50 fish	3	Yes	Buy directly from suppliers	No	No	Once a week	Yes	Kept in the aquarium	Yes	I make a donation	No	aquarism forums, Internet searches (google, blogs), Trial and error	More fish will be available for trade in the future due to cultivation
58	2019-01-21 17:50:51	Hobbysta and Seller	Between 1 and 5 years	Commercial interest - in addition to creating, you sell ornamental fish, Beauty of animals and aquariums	Freshwater	Aesthetics of the animal, Origin of the animal, Animal behavior	Raised in captivity	Less than 100 R$	Between 20 and 50 fish	4	Yes	Buy directly from suppliers	Yes	No	Daily	Yes	Sold	Yes	Sell	No	Courses, Book consultation and specific literature	More fish will be available for trade in the future due to cultivation
59	2019-01-21 17:59:31	Hobbysta (ornamental fish breeder only)	Between 1 and 5 years	Beauty of animals and aquariums, Encouragement, recommendation or inheritance of friends or family	Freshwater	Aesthetics of the animal, Origin of the animal	Raised in captivity	Less than 100 R$	50-80 camarões	0	Yes	Physical shops and petshops, Aquarism groups on Facebook, Buy directly from suppliers	No	No	Once every 15 days	Yes	No	Yes	I make a donation		aquarism forums, Internet searches (google, blogs), External access, Trial and error, Consult specialized websites	More fish will be available for trade in the future due to cultivation
60	2019-01-21 18:01:49	Hobbysta and Seller	Between 5 and 10 years	Beauty of animals and aquariums, Encouragement, recommendation or inheritance of friends or family	Freshwater	Animal price, Shop/seller recommendation, Aesthetics of the animal, Origin of the animal, Animal behavior	Raised in captivity	Between 500 and 1,000 R$	Between 20 and 50 fish	15	Yes	Physical shops and petshops, Online stores (free market, olx, aquarium store websites), Buy directly from suppliers	No	No	Once a week	Yes	Sold	Yes	Sell	No	aquarism forums, Internet searches (google, blogs), Trial and error, Book consultation and specific literature, Consult specialized websites	Fewer fish will be available for trade in the future due to excessive catch and loss of natural habitats
61	2019-01-21 19:08:30	Hobbysta (ornamental fish breeder only)	Since my childhood	Beauty of animals and aquariums	Freshwater	Origin of the animal	Raised in captivity	Between 100 and 500 R$	Between 5 and 10 fish	2	No	Buy directly from suppliers	No	No	Once a week	Yes	Sold	Yes	Sell	No	aquarism forums, Internet searches (google, blogs), Book consultation and specific literature, Consult specialized websites	More fish will be available for trade in the future due to cultivation
62	2019-01-21 19:49:51	Hobbysta (ornamental fish breeder only)	Since my childhood	Beauty of animals and aquariums	Freshwater	Origin of the animal	Raised in captivity	Between 500 and 1,000 R$	Between 20 and 50 fish	8	No	Physical shops and petshops	No	No	Once a week	No	No	Yes	Trade with other hobbyists for other fish or aquarium equipment	No	Consult specialized websites	Fewer fish will be available for trade in the future due to excessive catch and loss of natural habitats
63	2019-01-21 20:24:02	Hobbysta (ornamental fish breeder only)	Since my childhood	Beauty of animals and aquariums	Freshwater	Animal behavior	Raised in captivity	Between 100 and 500 R$	Between 10 and 20 fish	6	No	Physical shops and petshops, Buy directly from suppliers	No	No	Once every 15 days	Yes	Kept in the aquarium	Yes	Trade with other hobbyists for other fish or aquarium equipment		Internet searches (google, blogs), Consult specialized websites	Fewer fish will be available for trade in the future due to excessive catch and loss of natural habitats
64	2019-01-21 20:45:30	Hobbysta (ornamental fish breeder only)	Since my childhood	Encouragement, recommendation or inheritance of friends or family	Freshwater	Animal price, Aesthetics of the animal, Animal behavior, Ease in caring for the animal	Raised in captivity	Between 100 and 500 R$	Between 5 and 10 fish	3	Yes	Physical shops and petshops	No	No	Once a month	Yes	Kept in the aquarium	Yes	Release in nature		Internet searches (google, blogs), Trial and error, Book consultation and specific literature, Consult specialized websites
65	2019-01-21 20:56:18	Hobbysta and Seller	Less than 1 year ago	Beauty of animals and aquariums	Freshwater	Aesthetics of the animal	Raised in captivity	Less than 100 R$	Entre 50 e 100 peixes	1	No	grupos de whattsap	No	Yes	Once a week	Yes	Sold	No	Sell	No	Trial and error	More fish will be available for trade in the future due to cultivation
66	2019-01-21 21:29:28	Hobbysta and Seller	Since my childhood	Beauty of animals and aquariums	Freshwater	Aesthetics of the animal, Animal behavior	Raised in captivity	Between 100 and 500 R$	Between 20 and 50 fish	9	No	Buy directly from suppliers	No	No	Once a week	Yes	Sold	Yes	Sell	Yes	Courses, Internet searches (google, blogs), External access, Consult specialized websites	Fewer fish will be available for trade in the future due to excessive catch and loss of natural habitats
67	2019-01-21 21:48:07	Hobbysta and Seller	Between 1 and 5 years	Commercial interest - in addition to creating, you sell ornamental fish, Beauty of animals and aquariums	Marine	Behavior of the animal, If the animal provides any function inside the aquarium	Wild caught in nature	More than 2 thousand R$	Between 20 and 50 fish	4	Yes	Buy directly from suppliers	Yes	No	Once a month	No	No	Yes	Sell	No	aquarism forums, Internet searches (google, blogs)	More fish will be available for trade in the future due to cultivation
68	2019-01-21 21:58:06	Hobbysta (ornamental fish breeder only)	Between 5 and 10 years	Beauty of animals and aquariums	Freshwater	Origin of the animal, Animal behavior	Raised in captivity	Between 100 and 500 R$	Less than 5 fish	4	Yes	Physical shops and petshops, Aquarism groups on Facebook, Buy directly from suppliers	Yes	No	Once a week	Yes	You've given it to another aquarist	Yes	I make a donation	No	aquarism forums, Courses, Internet searches (google, blogs), External access, Trial and error, Book consultation and specific literature, Consult specialized websites	Fewer fish will be available for trade in the future due to excessive catch and loss of natural habitats
69	2019-01-21 23:00:55	Hobbysta (ornamental fish breeder only)	Between 1 and 5 years	Beauty of animals and aquariums	Marine	Aesthetics of the animal	Raised in captivity	Between 100 and 500 R$	Less than 5 fish	3	Yes	Physical shops and petshops	No	No	Once a month	No	Kept in the aquarium	Yes	I make a donation	No	aquarism forums, Internet searches (google, blogs), Trial and error, Book consultation and specific literature, Consult specialized websites, Whatsapp	More fish will be available for trade in the future due to cultivation
70	2019-01-22 06:08:01	Hobbysta (ornamental fish breeder only)	Between 5 and 10 years	Beauty of animals and aquariums	Freshwater	Aesthetics of the animal, Behavior of the animal, If the animal provides any function inside the aquarium	Raised in captivity	Between 100 and 500 R$	Between 5 and 10 fish	3	Yes	Physical shops and petshops	No	No	More than once a week	No	You've given it to another aquarist	Yes	Sell	No	aquarism forums, Internet searches (google, blogs), Consult specialized websites	More fish will be available for trade in the future due to cultivation
71	2019-01-22 09:40:03	Hobbysta and Seller	Between 5 and 10 years	Beauty of animals and aquariums	Freshwater	Animal behavior	Raised in captivity	Between 100 and 500 R$	Between 5 and 10 fish	6	Yes	Physical shops and petshops, Aquarism groups on Facebook, Buy directly from suppliers	No	No	More than once a week	Yes	Swapped with another aquarist for another fish	Yes	Trade with other hobbyists for other fish or aquarium equipment	No	aquarism forums, Internet searches (google, blogs), Consult specialized websites	More fish will be available for trade in the future due to cultivation
72	2019-01-22 17:36:52	Hobbysta (ornamental fish breeder only)	Since my childhood	Beauty of animals and aquariums	Freshwater	Aesthetics of the animal, Behavior of the animal, If the animal provides any function inside the aquarium, Ease in caring for the animal	Raised in captivity	Between 100 and 500 R$	Between 20 and 50 fish	17	No	Physical shops and petshops	Yes	No	Once a week	Yes	Kept in the aquarium	Yes	I make a donation	No	aquarism forums, Internet searches (google, blogs), Trial and error, Book consultation and specific literature, Consult specialized websites	More fish will be available for trade in the future due to cultivation
73	2019-01-22 17:45:00	Hobbysta (ornamental fish breeder only)	Less than 1 year ago	Beauty of animals and aquariums	Freshwater	Animal behavior, Ease in caring for the animal	Raised in captivity	Less than 100 R$	Between 5 and 10 fish	5	No	Physical shops and petshops	No	No	Once a month	No	No	No	Troca ou devolve com a loja onde adquiriu	No	Internet searches (google, blogs)	Fewer fish will be available for trade in the future due to excessive catch and loss of natural habitats
74	2019-01-22 17:51:27	Hobbysta (ornamental fish breeder only)	Less than 1 year ago	Beauty of animals and aquariums	Freshwater	Aesthetics of the animal, Animal behavior, Ease in caring for the animal	Raised in captivity	Between 100 and 500 R$	Between 20 and 50 fish	0	Yes	Physical shops and petshops, Buy directly from suppliers	No	No	Once a week	No	Kept in the aquarium	Yes	I make a donation		aquarism forums, Internet searches (google, blogs), Consult specialized websites	More fish will be available for trade in the future due to cultivation
75	2019-01-23 09:40:09	Hobbysta (ornamental fish breeder only)	Since my childhood	Beauty of animals and aquariums	Freshwater	Origin of the animal	Raised in captivity	Less than 100 R$	Less than 5 fish	1	No	Physical shops and petshops	No	No	Once every 15 days	Yes	You've given it to another aquarist	Yes	I make a donation		Internet searches (google, blogs)
76	2019-01-23 16:10:43	Hobbysta (ornamental fish breeder only)	More than 10 years ago	Beauty of animals and aquariums	Freshwater	Ease in caring for the animal	Wild caught in nature	Less than 100 R$	Between 20 and 50 fish	7	Yes	Online stores (free market, olx, aquarium store websites)	Yes	No	Daily	Yes	Kept in the aquarium	No	Sell		Internet searches (google, blogs), Trial and error, Consult specialized websites	Fewer fish will be available for trade in the future due to excessive catch and loss of natural habitats
77	2019-01-24 13:01:00	Hobbysta (ornamental fish breeder only)	More than 10 years ago	Beauty of animals and aquariums	Freshwater	Animal price, Aesthetics of the animal, Ease in caring for the animal	Raised in captivity	Less than 100 R$	Between 10 and 20 fish	7	No	Physical shops and petshops, Aquarism groups on Facebook	No	No	Once a month	Yes	Kept in the aquarium	Yes	I never fell apart	No	aquarism forums, Internet searches (google, blogs), Trial and error, Consult specialized websites	More fish will be available for trade in the future due to cultivation
78	2019-01-24 17:47:58	Hobbysta and Seller	More than 10 years ago	Beauty of animals and aquariums	Freshwater	Aesthetics of the animal, Origin of the animal, Behavior of the animal, If the animal provides any function inside the aquarium, Ease in caring for the animal	Raised in captivity	Between 500 and 1,000 R$	Between 20 and 50 fish	10	Yes	Physical shops and petshops, Buy directly from suppliers	No	No	More than once a week	Yes	Kept in the aquarium	No	Trade with other hobbyists for other fish or aquarium equipment		Internet searches (google, blogs), Trial and error, Consult specialized websites	More fish will be available for trade in the future due to cultivation
79	2019-01-24 18:53:29	Hobbysta (ornamental fish breeder only)	Between 5 and 10 years	Beauty of animals and aquariums	Freshwater	Origin of the animal	Raised in captivity	Between 100 and 500 R$	Between 20 and 50 fish	4	No	Physical shops and petshops	Yes	No	Once a week	Yes	Kept in the aquarium	Yes	I never fell apart	No	aquarism forums, Internet searches (google, blogs), Consult specialized websites	More fish will be available for trade in the future due to cultivation
80	2019-01-24 19:17:21	Hobbysta (ornamental fish breeder only)	Less than 1 year ago	Beauty of animals and aquariums	Freshwater	Aesthetics of the animal	Raised in captivity	Less than 100 R$	Entre 50 e 100 peixes	3	Yes	Buy directly from suppliers	No	No	More than once a week	Yes	Kept in the aquarium	Yes	I make a donation	No	With friends	More fish will be available for trade in the future due to cultivation
81	2019-01-24 19:19:35	Hobbysta (ornamental fish breeder only)	Between 1 and 5 years	Beauty of animals and aquariums	Freshwater	Ease in caring for the animal	Raised in captivity	Less than 100 R$	Between 10 and 20 fish	5	No	Physical shops and petshops	Yes	No	Once a week	No	No	No	I make a donation		aquarism forums, Courses, Internet searches (google, blogs), Consult specialized websites	More fish will be available for trade in the future due to cultivation
82	2019-01-24 19:38:17	Hobbysta (ornamental fish breeder only)	Since my childhood	Beauty of animals and aquariums, Behavior - are easy animals to care for, do not make noise	Freshwater	Origin of the animal, Animal behavior	Raised in captivity	Between 100 and 500 R$	Less than 5 fish	1	No	Physical shops and petshops	Yes	No	Once a week	No	No	No	I make a donation		Courses, Internet searches (google, blogs), Trial and error, Consult specialized websites
83	2019-01-25 11:43:37	Hobbysta (ornamental fish breeder only)	More than 10 years ago	Beauty of animals and aquariums	Freshwater	Animal behavior	Raised in captivity	Less than 100 R$	Between 5 and 10 fish	0	Yes	Online stores (free market, olx, aquarium store websites)	No	No	More than once a week	Yes	Kept in the aquarium	Yes	Trade with other hobbyists for other fish or aquarium equipment	No	aquarism forums	Fewer fish will be available for trade in the future due to excessive catch and loss of natural habitats
84	2019-01-25 12:19:45	Hobbysta (ornamental fish breeder only)	Since my childhood	Beauty of animals and aquariums, Behavior - are easy animals to care for, do not make noise	Freshwater	Origin of the animal, Animal behavior	Raised in captivity	Between 100 and 500 R$	Less than 5 fish	1	No	Physical shops and petshops	Yes	No	Once a week	No	No	No	I make a donation		Courses, Internet searches (google, blogs), Trial and error, Consult specialized websites
85	2019-01-26 09:39:35	Hobbysta (ornamental fish breeder only)	More than 10 years ago	Beauty of animals and aquariums	Freshwater	Compatibility with my aquarium and my fauna	Raised in captivity	Less than 100 R$	Between 10 and 20 fish	10	No	Physical shops and petshops	No	No	Once every 15 days	No	No	Yes	Sell		aquarism forums, Internet searches (google, blogs), Trial and error, Book consultation and specific literature, Consult specialized websites	Fewer fish will be available for trade in the future due to excessive catch and loss of natural habitats
86	2019-01-26 09:39:56	Hobbysta (ornamental fish breeder only)	More than 10 years ago	Beauty of animals and aquariums	Freshwater	Compatibility with my aquarium and my fauna	Raised in captivity	Less than 100 R$	Between 10 and 20 fish	10	No	Physical shops and petshops	No	No	Once every 15 days	No	No	Yes	Sell		aquarism forums, Internet searches (google, blogs), Trial and error, Book consultation and specific literature, Consult specialized websites	Fewer fish will be available for trade in the future due to excessive catch and loss of natural habitats
87	2019-01-26 11:25:20	Hobbysta and Seller	More than 10 years ago	Beauty of animals and aquariums	Freshwater	Origin of the animal, Behavior of the animal, If the animal provides any function inside the aquarium, Compatibility with my aquarium and my fauna	Raised in captivity	Between 100 and 500 R$	Between 20 and 50 fish	5	Yes	Physical shops and petshops, Online stores (free market, olx, aquarium store websites)	Yes	No	Once a month	Yes	Kept in the aquarium	Yes	All options acima, com exceção de "Release in nature".	No	Estudei e contribui como estagiário no Setor de Piscicultura (ESALQ-USP) precisei sair da faculdade devido a necessidade de trabalhar, trabalhei em lojas especializadas em aquarismo, depois trabalhei como responsável pela manutenção do Aquário Municipal de Piracicaba-SP e hoje em dia faço meus próprios estudos em livros, publicações científicas na internet e a própria experiencia em lidar com aqu…	More fish will be available for trade in the future due to cultivation
88	2019-01-26 20:42:20	Hobbysta (ornamental fish breeder only)	Between 1 and 5 years	Beauty of animals and aquariums	Freshwater	If the animal provides any function inside the aquarium	Raised in captivity	Less than 100 R$	Between 5 and 10 fish	1	Yes	Physical shops and petshops	Yes	No	Once a month	Yes	You've given it to another aquarist	Yes	I make a donation	Yes	Trial and error	Fewer fish will be available for trade in the future due to excessive catch and loss of natural habitats
89	2019-01-27 10:08:01	Hobbysta (ornamental fish breeder only)	More than 10 years ago	Beauty of animals and aquariums	Freshwater	Aesthetics of the animal, Origin of the animal	Raised in captivity	Less than 100 R$	Between 20 and 50 fish	2	No	Physical shops and petshops, Aquarism groups on Facebook	No	No	More than once a week	Yes	Kept in the aquarium	Yes	Release in nature	Yes	aquarism forums, Internet searches (google, blogs), Trial and error, Book consultation and specific literature, Consult specialized websites	More fish will be available for trade in the future due to cultivation
90	2019-01-28 17:22:02	Hobbysta (ornamental fish breeder only)	More than 10 years ago	Beauty of animals and aquariums	Freshwater	Origin of the animal	Raised in captivity	Between 500 and 1,000 R$	Between 20 and 50 fish	14	No	Physical shops and petshops	No	Yes	Once every 15 days	Yes	Kept in the aquarium	Yes	I make a donation	No	Trial and error	More fish will be available for trade in the future due to cultivation
91	2019-01-28 17:22:45	Hobbysta (ornamental fish breeder only)	Between 5 and 10 years	Beauty of animals and aquariums	Freshwater	Behavior of the animal, If the animal provides any function inside the aquarium	Raised in captivity	Between 100 and 500 R$	Between 20 and 50 fish	6	No	Physical shops and petshops	No	No	Once every 15 days	Yes	Kept in the aquarium	Yes	Trade with other hobbyists for other fish or aquarium equipment	No	Internet searches (google, blogs)	More fish will be available for trade in the future due to cultivation
92	2019-01-28 18:17:11	Hobbysta and Seller	Between 1 and 5 years	Beauty of animals and aquariums, Behavior - are easy animals to care for, do not make noise, Therapy/depression/anxiety/calm	Freshwater	Origin of the animal, Animal behavior	Raised in captivity	Less than 100 R$	Between 20 and 50 fish	6	No	Physical shops and petshops, Aquarism groups on Facebook, Buy directly from suppliers	No	No	Every 6 months	Yes	Swapped with another aquarist for another fish	Yes	Trade with other hobbyists for other fish or aquarium equipment	No	aquarism forums, Internet searches (google, blogs), Trial and error, Consult specialized websites, Amigos	Fewer fish will be available for trade in the future due to excessive catch and loss of natural habitats
93	2019-01-28 21:40:15	Conservacionista	More than 10 years ago	Beauty of animals and aquariums	Freshwater	animal health	Raised in captivity	Less than 100 R$	Entre 100 e 500 peixes	0	Yes	Physical shops and petshops, Buy directly from suppliers	Yes	No	Every 3 months	Yes	Kept in the aquarium	No	Uso para minha alimentação		aquarism forums, Internet searches (google, blogs), Trial and error, Book consultation and specific literature, Consult specialized websites, Amigos experientes	Fewer fish will be available for trade in the future due to excessive catch and loss of natural habitats
94	2019-01-28 22:37:22	Hobbysta (ornamental fish breeder only)	Between 5 and 10 years	Beauty of animals and aquariums	Freshwater	Shop/seller recommendation, If the animal provides any function inside the aquarium, Ease in caring for the animal	Raised in captivity	Less than 100 R$	Between 10 and 20 fish	6	No	Physical shops and petshops	No	No	Once a month	Yes	You've given it to another aquarist	Yes	I make a donation	No	aquarism forums, Trial and error	More fish will be available for trade in the future due to cultivation
95	2019-01-29 17:45:03	Hobbysta (ornamental fish breeder only)	Between 5 and 10 years	Beauty of animals and aquariums	Freshwater	Aesthetics of the animal	Raised in captivity	Less than 100 R$	Less than 5 fish	1	No	Physical shops and petshops	No	No	Once a week	No	No	No	I make a donation	No	aquarism forums, Internet searches (google, blogs), Book consultation and specific literature	More fish will be available for trade in the future due to cultivation
96	2019-01-29 20:59:39	Hobbysta and Seller	More than 10 years ago	Beauty of animals and aquariums	Freshwater	Origin of the animal	Raised in captivity	Between 100 and 500 R$	Between 20 and 50 fish	18	Yes	Aquarism groups on Facebook, Buy directly from suppliers	No	No	Once a week	Yes	Swapped with another aquarist for another fish	Yes	Trade with other hobbyists for other fish or aquarium equipment	No	aquarism forums, Trial and error, Book consultation and specific literature	Fewer fish will be available for trade in the future due to excessive catch and loss of natural habitats
97	2019-01-29 23:38:27	Hobbysta (ornamental fish breeder only)	Between 5 and 10 years	Beauty of animals and aquariums	Freshwater	Animal behavior	Raised in captivity	Less than 100 R$	Between 10 and 20 fish	3	No	Nature and Shops	No	Yes	Once a month	Yes	Kept in the aquarium	Yes	I make a donation	Yes	Internet searches (google, blogs), Trial and error	Fewer fish will be available for trade in the future due to excessive catch and loss of natural habitats
98	2019-01-30 18:51:53	Hobbysta (ornamental fish breeder only)	Between 1 and 5 years	Beauty of animals and aquariums	Freshwater	If the animal provides any function inside the aquarium	Raised in captivity	Less than 100 R$	Less than 5 fish	2	No	Physical shops and petshops	No	No	Once a week	No	No	Yes	I make a donation	No	Trial and error	More fish will be available for trade in the future due to cultivation
99	2019-01-31 02:40:44	Hobbysta and Seller	Since my childhood	Beauty of animals and aquariums, Passion for fish and aquariums	Freshwater	Animal price, Aesthetics of the animal, Origin of the animal, Behavior of the animal, If the animal provides any function inside the aquarium, Compatibility with my aquarium and my fauna	Raised in captivity	Less than 100 R$	Entre 100 e 500 peixes	34	Yes	Physical shops and petshops, Aquarism groups on Facebook, Buy directly from suppliers, Como os crio, também efetuo exchanges para mantem um padrão alto de linhagem.	No	No	Once a week	Yes	Kept in the aquarium, Sold, You've given it to another aquarist,Traded with another aquarist	Yes	All options	No	aquarism forums, Internet searches (google, blogs), Trial and error, Book consultation and specific literature, Consult specialized websites, Experiências controladas	Fewer fish will be available for trade in the future due to excessive catch and loss of natural habitats
100	2019-02-02 20:10:15	Hobbysta (ornamental fish breeder only)	Between 5 and 10 years	Commercial interest - in addition to creating, you sell ornamental fish, Beauty of animals and aquariums	Freshwater	Shop/seller recommendation, Aesthetics of the animal, Origin of the animal	Raised in captivity	Less than 100 R$	Between 20 and 50 fish	5	Yes	Buy directly from suppliers	No	No	Once a week	Yes	Kept in the aquarium, Sold	Yes	All options	Yes	aquarism forums, Internet searches (google, blogs), External access, Trial and error, Amigos	More fish will be available for trade in the future due to cultivation
101	2019-02-02 20:54:53	Hobbysta (ornamental fish breeder only)	More than 10 years ago	Beauty of animals and aquariums	Freshwater	Aesthetics of the animal, Origin of the animal, Animal behavior, Ease in caring for the animal, Compatibility with my aquarium and my fauna	Raised in captivity	Less than 100 R$	Between 5 and 10 fish	2	No	Physical shops and petshops, Buy directly from suppliers	No	No	Once a month	Yes	Kept in the aquarium	No	Trade with other hobbyists for other fish or aquarium equipment	Yes	aquarism forums, External access, Trial and error, Book consultation and specific literature, Consult specialized websites	More fish will be available for trade in the future due to cultivation
102	2019-02-02 21:14:05	Hobbysta (ornamental fish breeder only)	Since my childhood	Beauty of animals and aquariums	Freshwater	Animal behavior	Raised in captivity	Less than 100 R$	Between 5 and 10 fish	3	No	Physical shops and petshops	No	No	Once every 15 days	Yes	Kept in the aquarium	Yes	I make a donation	Yes	aquarism forums, Internet searches (google, blogs), Trial and error, Grupos de aquarismo em redes sociais	Fewer fish will be available for trade in the future due to excessive catch and loss of natural habitats
103	2019-02-03 17:52:59	Hobbysta (ornamental fish breeder only)	Between 1 and 5 years	Beauty of animals and aquariums	Freshwater	Origin of the animal	Raised in captivity	Between 100 and 500 R$	Between 20 and 50 fish	10	No	Physical shops and petshops	Yes	No	Once every 15 days	Yes	Kept in the aquarium	Yes	Troca ou devolve com a loja onde adquiriu	Yes	aquarism forums, Courses, Internet searches (google, blogs), Book consultation and specific literature, Consult specialized websites	Fewer fish will be available for trade in the future due to excessive catch and loss of natural habitats
104	2019-02-04 13:30:01	Hobbysta (ornamental fish breeder only)	Since my childhood	Beauty of animals and aquariums	Freshwater	Shop/seller recommendation	Raised in captivity	Between 100 and 500 R$	Between 10 and 20 fish	4	No	Physical shops and petshops	No	No	Once a month	No	Kept in the aquarium	Yes	I make a donation	Yes	aquarism forums, Internet searches (google, blogs), Trial and error, Book consultation and specific literature, Consult specialized websites	More fish will be available for trade in the future due to cultivation
105	2019-02-04 14:05:00	Hobbysta (ornamental fish breeder only)	Between 1 and 5 years	Beauty of animals and aquariums	Freshwater	Aesthetics of the animal	Raised in captivity	Less than 100 R$	Between 5 and 10 fish	9	No	Physical shops and petshops	No	No	Once a week	No	No	Yes	Troca ou devolve com a loja onde adquiriu	Yes	aquarism forums, Courses, Internet searches (google, blogs), External access, Trial and error, Consult specialized websites, Lojistas	More fish will be available for trade in the future due to cultivation
106	2019-02-04 14:10:53	Hobbysta (ornamental fish breeder only)	Between 1 and 5 years	Beauty of animals and aquariums	Freshwater	Animal price	Raised in captivity	Less than 100 R$	Less than 5 fish	1	No	Physical shops and petshops	No	No	Once every 15 days	No	Kept in the aquarium	No	Trade with other hobbyists for other fish or aquarium equipment		Internet searches (google, blogs), Trial and error	More fish will be available for trade in the future due to cultivation
107	2019-02-04 19:13:31	Hobbysta and Seller	Between 1 and 5 years	Beauty of animals and aquariums	Freshwater	Aesthetics of the animal	Raised in captivity	Less than 100 R$	Between 20 and 50 fish	13	Yes	Physical shops and petshops	No	No	Once a month	Yes	Sold	No	Sell	Yes	Internet searches (google, blogs)	More fish will be available for trade in the future due to cultivation
108	2019-02-04 19:22:58	Hobbysta (ornamental fish breeder only)	More than 10 years ago	Beauty of animals and aquariums	Freshwater	Compatibility with my aquarium and my fauna	Indifferent	Between 100 and 500 R$	Between 20 and 50 fish	14	Yes	Physical shops and petshops	No	No	Once a week	Yes	Used as food for other fish	Yes	Sell	Yes	aquarism forums, Internet searches (google, blogs), Trial and error, Book consultation and specific literature, Consult specialized websites, Conversa com lojistas, Amigos	More fish will be available for trade in the future due to cultivation
109	2019-02-05 08:10:04	Hobbysta (ornamental fish breeder only)	Between 5 and 10 years	Beauty of animals and aquariums	Freshwater	Aesthetics of the animal, Animal behavior	Raised in captivity	Less than 100 R$	Between 10 and 20 fish	7	No	Physical shops and petshops	No	No	More than once a week	Yes	Kept in the aquarium	Yes	I make a donation		aquarism forums, Internet searches (google, blogs), Book consultation and specific literature, Consult specialized websites	More fish will be available for trade in the future due to cultivation
110	2019-02-05 15:49:03	Hobbysta (ornamental fish breeder only)	Since my childhood	Passion for fish and aquariums	Freshwater	amor a primeira vista	Indifferent	Between 100 and 500 R$	Between 10 and 20 fish	6	No	Physical shops and petshops	No	No	Once a month	No	No	No	Sell		curiosity	Fewer fish will be available for trade in the future due to excessive catch and loss of natural habitats
111	2019-02-05 15:54:04	Hobbysta and Seller	Between 1 and 5 years	Commercial interest - in addition to creating, you sell ornamental fish, Beauty of animals and aquariums, Encouragement, recommendation or inheritance of friends or family	Freshwater	Animal price, Aesthetics of the animal, Animal behavior	Raised in captivity	Between 100 and 500 R$	Less than 5 fish	1	Yes	Online stores (free market, olx, aquarium store websites), Aquarism groups on Facebook, Buy directly from suppliers	No	No	Once a week	Yes	Sold	No	I make a donation	Yes	aquarism forums, Courses, Trial and error, Consult specialized websites, Faculdade	More fish will be available for trade in the future due to cultivation
112	2019-02-05 16:06:55	Hobbysta (ornamental fish breeder only)	More than 10 years ago	Beauty of animals and aquariums	Freshwater	Aesthetics of the animal, Origin of the animal, Animal behavior	Raised in captivity	Less than 100 R$	Less than 5 fish	2	No	Physical shops and petshops	Yes	No	Once a week	Yes	Kept in the aquarium	Yes	I make a donation	Yes	aquarism forums, Internet searches (google, blogs), Book consultation and specific literature, Consult specialized websites	Fewer fish will be available for trade in the future due to excessive catch and loss of natural habitats
113	2019-02-05 16:21:21	Hobbysta (ornamental fish breeder only)	Less than 1 year ago	Beauty of animals and aquariums, Behavior - are easy animals to care for, do not make noise	Freshwater	Animal price, Animal behavior	Raised in captivity	Between 100 and 500 R$	Between 20 and 50 fish	3	No	Physical shops and petshops, Online stores (free market, olx, aquarium store websites), Aquarism groups on Facebook	No	No	Once a week	No	No	No			Internet searches (google, blogs), Consult specialized websites	More fish will be available for trade in the future due to cultivation
114	2019-02-05 16:25:27	Hobbysta (ornamental fish breeder only)	Since my childhood	Beauty of animals and aquariums	Freshwater	Origin of the animal	Raised in captivity	Less than 100 R$	Entre 50 e 100 peixes	7	No	Physical shops and petshops, Aquarism groups on Facebook	No	No	Once every 15 days	Yes	Kept in the aquarium, Sold, You've given it to another aquarist,Traded with another aquarist	Yes	All options	Yes	aquarism forums, Internet searches (google, blogs), Trial and error, Book consultation and specific literature, Consult specialized websites	More fish will be available for trade in the future due to cultivation
115	2019-02-05 17:12:13	Hobbysta (ornamental fish breeder only)	Less than 1 year ago	Behavior - are easy animals to care for, do not make noise	Freshwater	Origin of the animal	Raised in captivity	Less than 100 R$	Between 5 and 10 fish	3	No	Physical shops and petshops	Yes	No	Once a week	No	No	No	Trade with other hobbyists for other fish or aquarium equipment	Yes	aquarism forums, Internet searches (google, blogs)	More fish will be available for trade in the future due to cultivation
116	2019-02-05 20:43:38	Hobbysta and Seller	Since my childhood	Beauty of animals and aquariums	The two options	Compatibility with my aquarium and my fauna	Raised in captivity	Less than 100 R$	Between 5 and 10 fish	1	No	Physical shops and petshops, Online stores (free market, olx, aquarium store websites), Aquarism groups on Facebook, Buy directly from suppliers	No	No	Once a week	Yes	Swapped with another aquarist for another fish	Yes	Sell	No	aquarism forums, Trial and error, Book consultation and specific literature, Consult specialized websites	More fish will be available for trade in the future due to cultivation
117	2019-02-05 22:58:52	Hobbysta and Seller	Between 1 and 5 years	Encouragement, recommendation or inheritance of friends or family	Freshwater	Animal behavior	Raised in captivity	Between 500 and 1,000 R$	Between 500 and 1000 fish	34	Yes	Buy directly from suppliers	Yes	Yes	Once a week	Yes	Sold	No	Sell	Yes	Internet searches (google, blogs)	Fewer fish will be available for trade in the future due to excessive catch and loss of natural habitats
118	2019-02-06 14:51:54	Hobbysta (ornamental fish breeder only)	Between 5 and 10 years	Beauty of animals and aquariums	Freshwater	Aesthetics of the animal	Raised in captivity	Less than 100 R$	Between 20 and 50 fish	4	No	Physical shops and petshops, Aquarism groups on Facebook	No	No	Once a month	Yes	Kept in the aquarium, You've given it to another aquarist	Yes	I make a donation	No	aquarism forums, Internet searches (google, blogs), Trial and error	More fish will be available for trade in the future due to cultivation
119	2019-02-06 22:38:54	Hobbysta and Seller	Since my childhood	Beauty of animals and aquariums	Freshwater	Compatibility with my aquarium and my fauna	Raised in captivity	Between 100 and 500 R$	Between 20 and 50 fish	9	No	Buy directly from suppliers	No	No	Once a month	Yes	Sold	Yes	Sell		aquarism forums, Book consultation and specific literature, Consult specialized websites	More fish will be available for trade in the future due to cultivation
120	2019-02-07 19:59:58	Hobbysta (ornamental fish breeder only)	Between 1 and 5 years	Encouragement, recommendation or inheritance of friends or family	Freshwater	Animal price, Ease in caring for the animal	Raised in captivity	Less than 100 R$	Less than 5 fish	4	No	Physical shops and petshops	Yes	No	Once a week	No	No	Yes	Trade with other hobbyists for other fish or aquarium equipment	No	Internet searches (google, blogs), Trial and error, Consult specialized websites	Fewer fish will be available for trade in the future due to excessive catch and loss of natural habitats
121	2019-02-07 20:08:14	Hobbysta (ornamental fish breeder only)	More than 10 years ago	Beauty of animals and aquariums	Freshwater	Origin of the animal, If the animal provides any function inside the aquarium	Raised in captivity	Less than 100 R$	Between 5 and 10 fish	5	No	Physical shops and petshops, Buy directly from suppliers	No	No	Once a month	Yes	Kept in the aquarium	Yes	Trade with other hobbyists for other fish or aquarium equipment		Internet searches (google, blogs), Trial and error, Book consultation and specific literature	More fish will be available for trade in the future due to cultivation
122	2019-02-07 20:29:25	Hobbysta (ornamental fish breeder only)	Between 1 and 5 years	Beauty of animals and aquariums	Freshwater	Shop/seller recommendation	Raised in captivity	Less than 100 R$	Between 5 and 10 fish	4	No	Physical shops and petshops	No	No	Once every 15 days	No	No	Yes	I make a donation	No	aquarism forums, Internet searches (google, blogs)	More fish will be available for trade in the future due to cultivation
123	2019-02-07 21:30:23	Hobbysta (ornamental fish breeder only)	Less than 1 year ago	Beauty of animals and aquariums	Freshwater	Origin of the animal	Indifferent	Between 100 and 500 R$	Less than 5 fish	0	No	Physical shops and petshops	No	No	More than once a week	Yes	Kept in the aquarium	Yes	I make a donation		Trial and error, Consult specialized websites	More fish will be available for trade in the future due to cultivation
124	2019-02-08 10:29:33	Hobbysta (ornamental fish breeder only)	More than 10 years ago	Beauty of animals and aquariums	Freshwater	Animal behavior	Raised in captivity	Between 100 and 500 R$	Between 5 and 10 fish	3	No	Physical shops and petshops, Aquarism groups on Facebook	No	No	Once a month	Yes	Swapped with another aquarist for another fish	Yes	Trade with other hobbyists for other fish or aquarium equipment	No	Trial and error, Book consultation and specific literature	Fewer fish will be available for trade in the future due to excessive catch and loss of natural habitats
125	2019-02-08 10:45:32	Hobbysta (ornamental fish breeder only)	More than 10 years ago	Beauty of animals and aquariums	Freshwater	Animal behavior	Raised in captivity	Between 100 and 500 R$	Between 20 and 50 fish	11	No	Physical shops and petshops	No	No	Once a week	Yes	Swapped with another aquarist for another fish	Yes	Trade with other hobbyists for other fish or aquarium equipment	No	aquarism forums, Internet searches (google, blogs), Trial and error	More fish will be available for trade in the future due to cultivation
126	2019-02-09 12:06:24	Hobbysta (ornamental fish breeder only)	Between 5 and 10 years	Beauty of animals and aquariums	Freshwater	Aesthetics of the animal, Origin of the animal, Animal behavior	Raised in captivity	Less than 100 R$	Between 10 and 20 fish	4	Yes	Physical shops and petshops	No	No	Once every 15 days	No	No	Yes	I make a donation	No	aquarism forums, Internet searches (google, blogs), Consult specialized websites	Fewer fish will be available for trade in the future due to excessive catch and loss of natural habitats
127	2019-02-09 12:17:24	Hobbysta (ornamental fish breeder only)	Between 1 and 5 years	Beauty of animals and aquariums, Encouragement, recommendation or inheritance of friends or family, Behavior - are easy animals to care for, do not make noise	Freshwater	Animal price, Aesthetics of the animal, Origin of the animal, Behavior of the animal, If the animal provides any function inside the aquarium, Ease in caring for the animal	Raised in captivity	Less than 100 R$	Less than 5 fish	3	Yes	Physical shops and petshops, Aquarism groups on Facebook, Buy directly from suppliers, Feira Livre de Duque de Caxias RJ	No	No	Once every 15 days	No	Swapped with another aquarist for another fish	Yes	Trade with other hobbyists for other fish or aquarium equipment	No	Trial and error	More fish will be available for trade in the future due to cultivation
128	2019-02-09 14:36:33	Hobbysta (ornamental fish breeder only)	Since my childhood	Encouragement, recommendation or inheritance of friends or family	Freshwater	Animal behavior	Raised in captivity	Between 100 and 500 R$	Entre 50 e 100 peixes	4	Yes	Physical shops and petshops	No	Yes	Once every 15 days	Yes	You've given it to another aquarist	Yes	Sell	No	Internet searches (google, blogs), Trial and error, Book consultation and specific literature	More fish will be available for trade in the future due to cultivation
129	2019-02-09 22:05:28	Hobbysta (ornamental fish breeder only)	Between 1 and 5 years	Beauty of animals and aquariums	Freshwater	Aesthetics of the animal, Origin of the animal, Behavior of the animal, If the animal provides any function inside the aquarium	Raised in captivity	Between 100 and 500 R$	Less than 5 fish	1	No	Physical shops and petshops	No	No	Once every 15 days	No	No	No	Trade with other hobbyists for other fish or aquarium equipment	Yes	Internet searches (google, blogs), Book consultation and specific literature, Consult specialized websites	More fish will be available for trade in the future due to cultivation
130	2019-02-10 21:21:09	Hobbysta (ornamental fish breeder only)	Between 1 and 5 years	Beauty of animals and aquariums	The two options	Aesthetics of the animal	Raised in captivity	Less than 100 R$	Between 20 and 50 fish	15	Yes	Physical shops and petshops, Online stores (free market, olx, aquarium store websites), Aquarism groups on Facebook, Buy directly from suppliers	No	No	Once every 15 days	Yes	You've given it to another aquarist	Yes	I make a donation	No	aquarism forums, Internet searches (google, blogs), Trial and error, Book consultation and specific literature, Consult specialized websites	More fish will be available for trade in the future due to cultivation
131	2019-02-10 21:24:02	Hobbysta (ornamental fish breeder only)	Less than 1 year ago	Beauty of animals and aquariums	Freshwater	Behavior of the animal, If the animal provides any function inside the aquarium, Ease in caring for the animal	Wild caught in nature	Between 100 and 500 R$	Less than 5 fish	1	No	Physical shops and petshops, Capture in nature (lakes, rivers, ocean)	No	No	Once a week	No	No	No	Trade with other hobbyists for other fish or aquarium equipment	No	aquarism forums, Internet searches (google, blogs), Consult specialized websites	Fewer fish will be available for trade in the future due to excessive catch and loss of natural habitats
132	2019-02-10 21:25:42	Hobbysta (ornamental fish breeder only)	Between 1 and 5 years	Beauty of animals and aquariums	The two options	Behavior of the animal, If the animal provides any function inside the aquarium, Compatibility with my aquarium and my fauna	Raised in captivity	Between 100 and 500 R$	Between 20 and 50 fish	11	No	Physical shops and petshops, Online stores (free market, olx, aquarium store websites), Aquarism groups on Facebook	No	No	Once every 15 days	Yes	You've given it to another aquarist	Yes	Trade with other hobbyists for other fish or aquarium equipment	No	Internet searches (google, blogs), External access, Book consultation and specific literature, Grupos de Whatsapp	Fewer fish will be available for trade in the future due to excessive catch and loss of natural habitats
133	2019-02-10 21:26:22	Hobbysta (ornamental fish breeder only)	Between 1 and 5 years	Beauty of animals and aquariums	Freshwater	Aesthetics of the animal, Origin of the animal, Behavior of the animal, If the animal provides any function inside the aquarium	Raised in captivity	Between 100 and 500 R$	Between 20 and 50 fish	10	No	Physical shops and petshops, Aquarism groups on Facebook, Buy directly from suppliers	No	No	Once every 15 days	Yes	Kept in the aquarium, Sold, Donated to other aquarists	Yes	Sell, I make a donation, Troco com outros aquaristas	No	aquarism forums, Internet searches (google, blogs), Consult specialized websites	More fish will be available for trade in the future due to cultivation
134	2019-02-10 21:28:25	Hobbysta (ornamental fish breeder only)	More than 10 years ago	Beauty of animals and aquariums	Freshwater	Aesthetics of the animal, Origin of the animal, If the animal provides any function inside the aquarium, Ease in caring for the animal	Raised in captivity	Between 100 and 500 R$	Between 20 and 50 fish	10	No	Physical shops and petshops, Aquarism groups on Facebook	Yes	No	Once every 15 days	Yes	You've given it to another aquarist	Yes	I make a donation	No	aquarism forums, Internet searches (google, blogs)	More fish will be available for trade in the future due to cultivation
135	2019-02-10 21:30:18	Hobbysta (ornamental fish breeder only)	More than 10 years ago	Beauty of animals and aquariums	Freshwater	If the animal provides any function inside the aquarium	Raised in captivity	Less than 100 R$	Between 5 and 10 fish	2	Yes	Aquarism groups on Facebook, Buy directly from suppliers	No	No	Once a week	Yes	You've given it to another aquarist	Yes	I make a donation	No	aquarism forums, Book consultation and specific literature, Consult specialized websites	More fish will be available for trade in the future due to cultivation
136	2019-02-10 21:49:28	Hobbysta (ornamental fish breeder only)	Since my childhood	Beauty of animals and aquariums	Freshwater	If the animal provides any function inside the aquarium	Raised in captivity	Less than 100 R$	Between 20 and 50 fish	2	No	Physical shops and petshops, Aquarism groups on Facebook	No	No	Once a month	Yes	Sold	Yes	Trade with other hobbyists for other fish or aquarium equipment	No	Trial and error	Fewer fish will be available for trade in the future due to excessive catch and loss of natural habitats
137	2019-02-10 21:54:09	Hobbysta (ornamental fish breeder only)	Between 1 and 5 years	Beauty of animals and aquariums	Freshwater	Animal behavior	Raised in captivity	Less than 100 R$	Between 5 and 10 fish	7	No	Physical shops and petshops	No	No	Once every 15 days	Yes	Sold	No	Sell	No	Internet searches (google, blogs)	More fish will be available for trade in the future due to cultivation
138	2019-02-10 22:01:20	Hobbysta (ornamental fish breeder only)	Between 1 and 5 years	Beauty of animals and aquariums,	Freshwater	Aesthetics of the animal, Behavior of the animal, If the animal provides any function inside the aquarium	Raised in captivity	Less than 100 R$	Between 20 and 50 fish	6	Yes	Physical shops and petshops, Online stores (free market, olx, aquarium store websites)	No	No	Every 3 months	Yes	were eaten by the other fish	Yes	I make a donation	No	aquarism forums, Internet searches (google, blogs), Trial and error, Book consultation and specific literature, Consult specialized websites	More fish will be available for trade in the future due to cultivation
139	2019-02-10 22:06:36	Hobbysta (ornamental fish breeder only)	Between 5 and 10 years	Beauty of animals and aquariums	Freshwater	Aesthetics of the animal, Origin of the animal, Behavior of the animal, If the animal provides any function inside the aquarium	Raised in captivity	Less than 100 R$	Between 10 and 20 fish	4	No	Physical shops and petshops	No	No	Once a week	Yes	Kept in the aquarium	Yes	I make a donation	No	aquarism forums, Internet searches (google, blogs), Book consultation and specific literature, Consult specialized websites	More fish will be available for trade in the future due to cultivation
140	2019-02-10 22:25:19	Hobbysta (ornamental fish breeder only)	Since my childhood	Beauty of animals and aquariums	Freshwater	Compatibility with my aquarium and my fauna	Raised in captivity	Between 100 and 500 R$	Between 20 and 50 fish	1	No	Physical shops and petshops	No	No	Annually	Yes	Sold	Yes	Sell	No	Internet searches (google, blogs), Consult specialized websites	More fish will be available for trade in the future due to cultivation
141	2019-02-10 22:26:05	Hobbysta (ornamental fish breeder only)	More than 10 years ago	Beauty of animals and aquariums	Freshwater	Aesthetics of the animal, Animal behavior, Compatibility with my aquarium and my fauna	Raised in captivity	Less than 100 R$	Between 10 and 20 fish	8	No	Physical shops and petshops, Online stores (free market, olx, aquarium store websites)	No	No	Once every 15 days	No	No	No	I make a donation	No	aquarism forums, Internet searches (google, blogs), Book consultation and specific literature, Consult specialized websites	Fewer fish will be available for trade in the future due to excessive catch and loss of natural habitats
142	2019-02-10 22:34:01	Hobbysta (ornamental fish breeder only)	More than 10 years ago	Beauty of animals and aquariums	Freshwater	Aesthetics of the animal	Raised in captivity	Between 100 and 500 R$	Between 20 and 50 fish	10	No	Aquarism groups on Facebook, Buy directly from suppliers	No	No	Once every 15 days	Yes	You've given it to another aquarist	No	I make a donation	No	aquarism forums	Fewer fish will be available for trade in the future due to excessive catch and loss of natural habitats
143	2019-02-11 06:17:30	Hobbysta (ornamental fish breeder only)	Between 1 and 5 years	Beauty of animals and aquariums	Freshwater	Aesthetics of the animal	Raised in captivity	Between 100 and 500 R$	Between 20 and 50 fish	10	No	Physical shops and petshops	No	No	Once every 15 days	Yes	Kept in the aquarium	No	I make a donation	No	Internet searches (google, blogs), Book consultation and specific literature, Consult specialized websites	More fish will be available for trade in the future due to cultivation
144	2019-02-11 06:45:20	Hobbysta (ornamental fish breeder only)	More than 10 years ago	Beauty of animals and aquariums	Freshwater	Origin of the animal, Animal behavior	Raised in captivity	Between 100 and 500 R$	Between 20 and 50 fish	11	No	Physical shops and petshops, Aquarism groups on Facebook, Buy directly from suppliers	No	No	Once a week	Yes	Sold	Yes	I make a donation	No	aquarism forums, Courses, Internet searches (google, blogs), Book consultation and specific literature	Fewer fish will be available for trade in the future due to excessive catch and loss of natural habitats
145	2019-02-11 06:58:51	Hobbysta (ornamental fish breeder only)	More than 10 years ago	Beauty of animals and aquariums	The two options	Origin of the animal	Raised in captivity	Between 500 and 1,000 R$	Between 20 and 50 fish	14	No	Physical shops and petshops	No	No	Once a week	Yes	Kept in the aquarium	Yes	Trade with other hobbyists for other fish or aquarium equipment	No	aquarism forums, Internet searches (google, blogs), Book consultation and specific literature, Consult specialized websites	More fish will be available for trade in the future due to cultivation
146	2019-02-11 08:38:39	Hobbysta and Seller	Between 1 and 5 years	Encouragement, recommendation or inheritance of friends or family	Freshwater	If the animal provides any function inside the aquarium	Raised in captivity	Between 100 and 500 R$	Between 5 and 10 fish	8	No	Aquarism groups on Facebook	No	No	Once a week	Yes	Sold	No	Trade with other hobbyists for other fish or aquarium equipment	No	aquarism forums, Consult specialized websites	Fewer fish will be available for trade in the future due to excessive catch and loss of natural habitats
147	2019-02-11 08:41:32	Hobbysta (ornamental fish breeder only)	More than 10 years ago	Interest in ecology and biology (development) of animals/challenge in creating an ecosystem	Freshwater	Set of all these criteria	Raised in captivity	Less than 100 R$	Between 20 and 50 fish	5	No	Several	No	No	Once a month	Yes	Kept in the aquarium, Sold, Donated to other aquarists, Traded with other aquarists	Yes	Trade with other hobbyists for other fish or aquarium equipment	No	aquarism forums	More fish will be available for trade in the future due to cultivation
148	2019-02-11 08:46:00	Hobbysta (ornamental fish breeder only)	Between 1 and 5 years	Beauty of animals and aquariums	Freshwater	Compatibility with my aquarium and my fauna	Raised in captivity	Less than 100 R$	Between 20 and 50 fish	15	Yes	Physical shops and petshops	No	No	Once a week	Yes	Sold	Yes	Sell	No	Internet searches (google, blogs)	Fewer fish will be available for trade in the future due to excessive catch and loss of natural habitats
149	2019-02-11 08:52:31	Hobbysta (ornamental fish breeder only)	Since my childhood	Beauty of animals and aquariums	Freshwater	Aesthetics of the animal, Animal behavior	Raised in captivity	Between 100 and 500 R$	Between 20 and 50 fish	11	Yes	Physical shops and petshops	No	Yes	Once a month	Yes	Kept in the aquarium	Yes	Trade with other hobbyists for other fish or aquarium equipment	Yes	aquarism forums, Internet searches (google, blogs), External access, Trial and error, Book consultation and specific literature, Consult specialized websites	Fewer fish will be available for trade in the future due to excessive catch and loss of natural habitats
150	2019-02-11 14:17:10	Hobbysta and Seller	Since my childhood	Beauty of animals and aquariums	Freshwater	Origin of the animal	Raised in captivity	Between 500 and 1,000 R$	Entre 100 e 500 peixes	1	No	Buy directly from suppliers	Yes	No	More than once a week	Yes	Kept in the aquarium	Yes	Sell	No	aquarism forums, Courses, Internet searches (google, blogs), External access, Trial and error, Book consultation and specific literature, Consult specialized websites	More fish will be available for trade in the future due to cultivation
151	2019-02-11 14:57:41	Hobbysta (ornamental fish breeder only)	Between 5 and 10 years	Beauty of animals and aquariums	Freshwater	Compatibility with my aquarium and my fauna	Raised in captivity	Less than 100 R$	Between 20 and 50 fish	5	No	Physical shops and petshops	No	No	Once every 15 days	No	No	Yes	I make a donation	Yes	aquarism forums, Internet searches (google, blogs), Trial and error, Consult specialized websites	Fewer fish will be available for trade in the future due to excessive catch and loss of natural habitats
152	2019-02-11 15:18:32	Hobbysta (ornamental fish breeder only)	Between 1 and 5 years	Beauty of animals and aquariums	Freshwater	Animal price, Aesthetics of the animal, Origin of the animal, Animal behavior	Raised in captivity	Less than 100 R$	Between 10 and 20 fish	8	No	Buy directly from suppliers	No	No	Once a month	No	No	Yes	Sell	No	Internet searches (google, blogs)	More fish will be available for trade in the future due to cultivation
153	2019-02-11 15:29:53	Hobbysta (ornamental fish breeder only)	Since my childhood	Behavior - are easy animals to care for, do not make noise	The two options	Aesthetics of the animal, Behavior of the animal, If the animal provides any function inside the aquarium	Raised in captivity	Between 100 and 500 R$	Between 5 and 10 fish	3	Yes	Physical shops and petshops	No	No	Once a month	No	Kept in the aquarium	No	I make a donation	No	aquarism forums, Trial and error, Whatsapp	More fish will be available for trade in the future due to cultivation
154	2019-02-11 15:36:02	Hobbysta (ornamental fish breeder only)	Since my childhood	Beauty of animals and aquariums	Freshwater	Shop/seller recommendation	Raised in captivity	Between 100 and 500 R$	Between 10 and 20 fish	12	No	Physical shops and petshops, Aquarism groups on Facebook	Yes	No	More than once a week	Yes	Swapped with another aquarist for another fish	Yes	Trade with other hobbyists for other fish or aquarium equipment	No	aquarism forums, Internet searches (google, blogs), Trial and error, Book consultation and specific literature, Consult specialized websites	More fish will be available for trade in the future due to cultivation
155	2019-02-11 15:37:39	Hobbysta (ornamental fish breeder only)	Between 5 and 10 years	Beauty of animals and aquariums	Freshwater	Aesthetics of the animal	Raised in captivity	Between 100 and 500 R$	Between 5 and 10 fish	2	No	Physical shops and petshops, Aquarism groups on Facebook	No	No	More than once a week	Yes	Sold	Yes	Sell	No	aquarism forums, Courses, Internet searches (google, blogs), Trial and error, Book consultation and specific literature, Consult specialized websites	More fish will be available for trade in the future due to cultivation
156	2019-02-11 15:42:15	Hobbysta and Seller	More than 10 years ago	Beauty of animals and aquariums	Freshwater	Origin of the animal, Animal behavior	Raised in captivity	Between 100 and 500 R$	Between 20 and 50 fish	8	No	Physical shops and petshops, Online stores (free market, olx, aquarium store websites), Aquarism groups on Facebook, Buy directly from suppliers, Capture in nature (lakes, rivers, ocean)	Yes	No	Once a week	Yes	were eaten by the other fish	No	Sell	Yes	Internet searches (google, blogs), Trial and error, Consult specialized websites	Fewer fish will be available for trade in the future due to excessive catch and loss of natural habitats
157	2019-02-11 15:43:47	Hobbysta (ornamental fish breeder only)	Less than 1 year ago	Beauty of animals and aquariums	Freshwater	Aesthetics of the animal, Behavior of the animal, If the animal provides any function inside the aquarium, Ease in caring for the animal	Raised in captivity	Less than 100 R$	Between 20 and 50 fish	4	No	Physical shops and petshops	Yes	No	Once every 10 days	Yes	Kept in the aquarium	Yes	I never fell apart	No	Internet searches (google, blogs), Conversando lojistas	Fewer fish will be available for trade in the future due to excessive catch and loss of natural habitats
158	2019-02-11 15:43:51	Hobbysta (ornamental fish breeder only)	More than 10 years ago	Beauty of animals and aquariums	Freshwater	Aesthetics of the animal, Origin of the animal, Behavior of the animal, If the animal provides any function inside the aquarium	Raised in captivity	Less than 100 R$	Between 5 and 10 fish	3	No	Physical shops and petshops	Yes	No	Once a month	No	You've given it to another aquarist	Yes	Trade with other hobbyists for other fish or aquarium equipment	No	Amigos do hobby	More fish will be available for trade in the future due to cultivation
159	2019-02-11 15:44:38	Hobbysta (ornamental fish breeder only)	Between 1 and 5 years	Beauty of animals and aquariums	Freshwater	Animal behavior	Raised in captivity	Between 100 and 500 R$	Between 10 and 20 fish	4	No	Physical shops and petshops, Aquarism groups on Facebook	Yes	No	Once a week	No	You've given it to another aquarist	Yes	Sell	No	aquarism forums	More fish will be available for trade in the future due to cultivation
160	2019-02-11 15:51:07	Hobbysta (ornamental fish breeder only)	Less than 1 year ago	Beauty of animals and aquariums	Freshwater	Animal price, Aesthetics of the animal, Ease in caring for the animal	Raised in captivity	Less than 100 R$	Between 10 and 20 fish	7	Yes	Physical shops and petshops, Aquarism groups on Facebook	No	No	Once a month	No	No	Yes	Trade with other hobbyists for other fish or aquarium equipment	No	aquarism forums, Internet searches (google, blogs), Consult specialized websites	More fish will be available for trade in the future due to cultivation
161	2019-02-11 15:51:38	Hobbysta (ornamental fish breeder only)	Between 5 and 10 years	Beauty of animals and aquariums	Freshwater	Animal behavior	Raised in captivity	Less than 100 R$	Less than 5 fish	1	No	Physical shops and petshops	No	No	Once every 15 days	No	No	No	Trade with other hobbyists for other fish or aquarium equipment	No	Trial and error	Fewer fish will be available for trade in the future due to excessive catch and loss of natural habitats
162	2019-02-11 15:57:10	Hobbysta and Seller	Since my childhood	Beauty of animals and aquariums	Freshwater	Aesthetics of the animal	Raised in captivity	Less than 100 R$	Between 20 and 50 fish	7	No	Physical shops and petshops	No	No	Every 6 months	Yes	You've given it to another aquarist	No	Trade with other hobbyists for other fish or aquarium equipment	No	aquarism forums, Internet searches (google, blogs), Book consultation and specific literature	More fish will be available for trade in the future due to cultivation
163	2019-02-11 15:57:22	Hobbysta (ornamental fish breeder only)	Less than 1 year ago	Beauty of animals and aquariums	Freshwater	Aesthetics of the animal, Behavior of the animal, If the animal provides any function inside the aquarium	Raised in captivity	Less than 100 R$	Between 10 and 20 fish	3	Yes	Physical shops and petshops	Yes	No	Once a week	No	No	No	I make a donation	No	aquarism forums, Internet searches (google, blogs), Trial and error, Book consultation and specific literature, Consult specialized websites	Fewer fish will be available for trade in the future due to excessive catch and loss of natural habitats
164	2019-02-11 16:05:54	Hobbysta (ornamental fish breeder only)	Between 1 and 5 years	Beauty of animals and aquariums	Freshwater	Animal behavior	Raised in captivity	Between 100 and 500 R$	Between 5 and 10 fish	4	No	Physical shops and petshops	No	No	Once a week	Yes	You've given it to another aquarist	Yes	Trade with other hobbyists for other fish or aquarium equipment	Yes	Internet searches (google, blogs), Trial and error, Consult specialized websites	Fewer fish will be available for trade in the future due to excessive catch and loss of natural habitats
165	2019-02-11 16:06:32	Hobbysta (ornamental fish breeder only)	Between 5 and 10 years	Beauty of animals and aquariums	Freshwater	Aesthetics of the animal, Origin of the animal, Behavior of the animal, If the animal provides any function inside the aquarium	Raised in captivity	Less than 100 R$	Between 10 and 20 fish	7	Yes	Physical shops and petshops	No	No	Once a week	Yes	Kept in the aquarium	No	I make a donation	No	aquarism forums, Book consultation and specific literature, Consult specialized websites	More fish will be available for trade in the future due to cultivation
166	2019-02-11 16:08:48	Hobbysta (ornamental fish breeder only)	Less than 1 year ago	Beauty of animals and aquariums	Freshwater	Animal price, Aesthetics of the animal, Animal behavior	Raised in captivity	Between 100 and 500 R$	Between 5 and 10 fish	1	No	Physical shops and petshops	No	No	Once every 15 days	No	Kept in the aquarium	No	I make a donation	No	Internet searches (google, blogs)	More fish will be available for trade in the future due to cultivation
167	2019-02-11 16:16:23	Hobbysta (ornamental fish breeder only)	Less than 1 year ago	Beauty of animals and aquariums	Freshwater	Animal price, Aesthetics of the animal, Animal behavior, Ease in caring for the animal	Raised in captivity	Less than 100 R$	Between 5 and 10 fish	2	Yes	Physical shops and petshops	No	No	Once every 15 days	Yes	Kept in the aquarium	No	I never fell apart	No	aquarism forums, Internet searches (google, blogs), Consult specialized websites	Fewer fish will be available for trade in the future due to excessive catch and loss of natural habitats
168	2019-02-11 16:22:46	Hobbysta (ornamental fish breeder only)	Less than 1 year ago	Beauty of animals and aquariums	Freshwater	Animal behavior	Raised in captivity	Between 100 and 500 R$	Less than 5 fish	2	No	Physical shops and petshops	Yes	No	Once a month	Yes	Kept in the aquarium	No	I make a donation	No	aquarism forums, Internet searches (google, blogs), Trial and error	Fewer fish will be available for trade in the future due to excessive catch and loss of natural habitats
169	2019-02-11 16:35:17	Hobbysta (ornamental fish breeder only)	Since my childhood	Beauty of animals and aquariums	Freshwater	Aesthetics of the animal, Origin of the animal, Behavior of the animal, If the animal provides any function inside the aquarium	Raised in captivity	Between 100 and 500 R$	Less than 5 fish	1	No	Physical shops and petshops, Online stores (free market, olx, aquarium store websites)	No	No	Once a week	Yes	Kept in the aquarium	No	I make a donation	No	aquarism forums, Internet searches (google, blogs), Trial and error, Consult specialized websites	More fish will be available for trade in the future due to cultivation
170	2019-02-11 16:45:21	Hobbysta and Seller	Between 5 and 10 years	Commercial interest - in addition to creating, you sell ornamental fish	The two options	Origin of the animal	Raised in captivity	Between 100 and 500 R$	Between 20 and 50 fish	13	Yes	Buy directly from suppliers	Yes	No	Once every 15 days	Yes	Sold	Yes	Sell	No	Courses, Internet searches (google, blogs), Trial and error	More fish will be available for trade in the future due to cultivation
171	2019-02-11 16:57:01	Hobbysta and Seller	Between 1 and 5 years	Beauty of animals and aquariums	Freshwater	Animal price, Aesthetics of the animal, Origin of the animal	Raised in captivity	Less than 100 R$	Between 20 and 50 fish	5	No	Online stores (free market, olx, aquarium store websites), Aquarism groups on Facebook, Buy directly from suppliers	No	No	More than once a week	Yes	Sold	Yes	Sell	No	aquarism forums, Internet searches (google, blogs), Trial and error, Book consultation and specific literature	More fish will be available for trade in the future due to cultivation
172	2019-02-11 17:15:53	Hobbysta and Seller	Between 1 and 5 years	Beauty of animals and aquariums	Freshwater	Aesthetics of the animal, Animal behavior	Raised in captivity	Less than 100 R$	Between 5 and 10 fish	3	No	Buy directly from suppliers	No	No	Once every 15 days	No	No	Yes	Sell	No	Internet searches (google, blogs), Trial and error, Consult specialized websites, Amigos experientes	More fish will be available for trade in the future due to cultivation
173	2019-02-11 17:17:39	Hobbysta (ornamental fish breeder only)	Since my childhood	Beauty of animals and aquariums	Freshwater	Aesthetics of the animal, Origin of the animal, Animal behavior	Raised in captivity	Less than 100 R$	Between 5 and 10 fish	3	No	Physical shops and petshops	No	No	Once a week	No	No	No	I make a donation	No	Internet searches (google, blogs), Trial and error	More fish will be available for trade in the future due to cultivation
174	2019-02-11 17:19:42	Hobbysta and Seller	Since my childhood	Beauty of animals and aquariums	The two options	Aesthetics of the animal	Raised in captivity	Less than 100 R$	Between 20 and 50 fish	26	Yes	Physical shops and petshops, Online stores (free market, olx, aquarium store websites)	Yes	No	More than once a week	Yes	Kept in the aquarium	Yes	Sell, I make a donation	No	Trial and error, lojistas	More fish will be available for trade in the future due to cultivation
175	2019-02-11 17:32:45	Hobbysta (ornamental fish breeder only)	Since my childhood	Beauty of animals and aquariums	Freshwater	Origin of the animal, Behavior of the animal, If the animal provides any function inside the aquarium, Ease in caring for the animal	Raised in captivity	Between 100 and 500 R$	Between 20 and 50 fish	3	No	Physical shops and petshops, Aquarism groups on Facebook	Yes	No	Once a week	Yes	You've given it to another aquarist	Yes	I make a donation	No	aquarism forums, Internet searches (google, blogs), Book consultation and specific literature	Fewer fish will be available for trade in the future due to excessive catch and loss of natural habitats
176	2019-02-11 17:39:55	Hobbysta and Seller	More than 10 years ago	Commercial interest - in addition to creating, you sell ornamental fish, Beauty of animals and aquariums	The two options	Animal price, Shop/seller recommendation, Aesthetics of the animal, Origin of the animal, Behavior of the animal, If the animal provides any function inside the aquarium, Ease in caring for the animal	Raised in captivity	Less than 100 R$	Between 20 and 50 fish	0	Yes	Physical shops and petshops, Aquarism groups on Facebook, Buy directly from suppliers	No	No	More than once a week	Yes	Sold	Yes	Sell	No	Book consultation and specific literature	More fish will be available for trade in the future due to cultivation
177	2019-02-11 17:39:56	Hobbysta (ornamental fish breeder only)	Between 1 and 5 years	Beauty of animals and aquariums	Freshwater	Animal price, Aesthetics of the animal, Behavior of the animal, If the animal provides any function inside the aquarium	Raised in captivity	Between 100 and 500 R$	Between 20 and 50 fish	5	No	Physical shops and petshops	No	No	Once every 10 days	No	No	Yes	I make a donation	No	aquarism forums, Internet searches (google, blogs), Trial and error, Consult specialized websites	Fewer fish will be available for trade in the future due to excessive catch and loss of natural habitats
178	2019-02-11 17:41:06	Hobbysta and Seller	Between 1 and 5 years	Beauty of animals and aquariums	Freshwater	Aesthetics of the animal	Raised in captivity	Between 100 and 500 R$	Between 20 and 50 fish	5	No	Physical shops and petshops	No	No	Once every 15 days	Yes	Sold	No	Trade with other hobbyists for other fish or aquarium equipment	No	aquarism forums	More fish will be available for trade in the future due to cultivation
179	2019-02-11 17:42:11	Hobbysta (ornamental fish breeder only)	Between 1 and 5 years	Beauty of animals and aquariums	Freshwater	Aesthetics of the animal	Raised in captivity	Less than 100 R$	Between 20 and 50 fish	7	No	Physical shops and petshops	Yes	No	Once every 15 days	No	No	Yes	I never fell apart	No	With hobbyist friends	More fish will be available for trade in the future due to cultivation
180	2019-02-11 17:42:39	Hobbysta (ornamental fish breeder only)	Between 1 and 5 years	Beauty of animals and aquariums	Freshwater	If the animal provides any function inside the aquarium	Raised in captivity	Less than 100 R$	Between 20 and 50 fish	11	No	Physical shops and petshops	No	Yes	Once a week	No	No	No	Trade with other hobbyists for other fish or aquarium equipment	No	Internet searches (google, blogs)	More fish will be available for trade in the future due to cultivation
181	2019-02-11 17:45:55	Hobbysta (ornamental fish breeder only)	Since my childhood	Commercial interest - in addition to creating, you sell ornamental fish, Beauty of animals and aquariums	The two options	Shop/seller recommendation	Raised in captivity	Less than 100 R$	Between 20 and 50 fish	10	Yes	Physical shops and petshops, Online stores (free market, olx, aquarium store websites), Buy directly from suppliers	No	No	Once a month	Yes	You've given it to another aquarist	Yes	I make a donation	No	aquarism forums, Courses, Trial and error, Book consultation and specific literature, Consult specialized websites	More fish will be available for trade in the future due to cultivation
182	2019-02-11 17:46:57	Hobbysta (ornamental fish breeder only)	More than 10 years ago	Beauty of animals and aquariums	Freshwater	If the animal provides any function inside the aquarium	Raised in captivity	Less than 100 R$	Between 20 and 50 fish	4	No	Physical shops and petshops	Yes	No	Once every 15 days	Yes	Kept in the aquarium	Yes	I never fell apart	No	Internet searches (google, blogs)	More fish will be available for trade in the future due to cultivation
183	2019-02-11 17:48:10	Hobbysta (ornamental fish breeder only)	Since my childhood	Beauty of animals and aquariums	Freshwater	If the animal provides any function inside the aquarium	Raised in captivity	Between 100 and 500 R$	Between 10 and 20 fish	3	Yes	Physical shops and petshops	Yes	No	Once every 15 days	Yes	released in nature	No	I make a donation	Yes	aquarism forums, Internet searches (google, blogs), Trial and error, Consult specialized websites	More fish will be available for trade in the future due to cultivation
184	2019-02-11 17:49:10	Hobbysta (ornamental fish breeder only)	Since my childhood	Beauty of animals and aquariums	Freshwater	Aesthetics of the animal, Compatibility with my aquarium and my fauna	Raised in captivity	Less than 100 R$	Between 20 and 50 fish	1	Yes	Physical shops and petshops	No	No	Once a month	Yes	Kept in the aquarium	Yes	I make a donation	No	aquarism forums, Internet searches (google, blogs), Trial and error, Book consultation and specific literature, Consult specialized websites	Fewer fish will be available for trade in the future due to excessive catch and loss of natural habitats
185	2019-02-11 17:50:13	Hobbysta (ornamental fish breeder only)	Between 5 and 10 years	Encouragement, recommendation or inheritance of friends or family	Marine	Shop/seller recommendation, Origin of the animal, If the animal provides any function inside the aquarium	Raised in captivity	Between 500 and 1,000 R$	Between 20 and 50 fish	9	Yes	Physical shops and petshops, Online stores (free market, olx, aquarium store websites), Aquarism groups on Facebook	No	No	More than once a week	Yes	Kept in the aquarium	Yes	Trade with other hobbyists for other fish or aquarium equipment	No	aquarism forums, Internet searches (google, blogs)	More fish will be available for trade in the future due to cultivation
186	2019-02-11 17:50:33	Hobbysta (ornamental fish breeder only)	Between 1 and 5 years	Beauty of animals and aquariums	Freshwater	Animal behavior	Indifferent	Less than 100 R$	Between 5 and 10 fish	3	No	Buy directly from suppliers	No	No	Once a week	Yes	Kept in the aquarium	Yes	I make a donation	No	Trial and error	More fish will be available for trade in the future due to cultivation
187	2019-02-11 17:54:07	Hobbysta (ornamental fish breeder only)	Between 1 and 5 years	Beauty of animals and aquariums	The two options	Ease in caring for the animal	Raised in captivity	Less than 100 R$	Between 10 and 20 fish	4	No	Physical shops and petshops	No	No	Once every 15 days	No	No	No	I make a donation	No	Consult specialized websites	More fish will be available for trade in the future due to cultivation
188	2019-02-11 17:59:15	Hobbysta (ornamental fish breeder only)	Between 5 and 10 years	Beauty of animals and aquariums	Freshwater	Aesthetics of the animal	Raised in captivity	Less than 100 R$	Between 10 and 20 fish	5	No	Physical shops and petshops	No	No	Once a month	No	No	No	Trade with other hobbyists for other fish or aquarium equipment	No	Internet searches (google, blogs), External access, Trial and error	More fish will be available for trade in the future due to cultivation
189	2019-02-11 18:08:10	Hobbysta (ornamental fish breeder only)	Between 1 and 5 years	Beauty of animals and aquariums	Freshwater	Shop/seller recommendation, Origin of the animal	Raised in captivity	Between 100 and 500 R$	Less than 5 fish	2	Yes	Physical shops and petshops, Aquarism groups on Facebook	Yes	No	More than once a week	Yes	You've given it to another aquarist	Yes	Trade with other hobbyists for other fish or aquarium equipment	No	Internet searches (google, blogs)	More fish will be available for trade in the future due to cultivation
190	2019-02-11 18:17:17	Hobbysta (ornamental fish breeder only)	More than 10 years ago	Passion for fish and aquariums	Freshwater	Animal behavior	Wild caught in nature	Between 100 and 500 R$	Between 20 and 50 fish	10	No	Physical shops and petshops, Online stores (free market, olx, aquarium store websites)	No	Yes	Once every 15 days	Yes	Sold	Yes	Trade with other hobbyists for other fish or aquarium equipment	No	aquarism forums, Trial and error	More fish will be available for trade in the future due to cultivation
191	2019-02-11 18:28:03	Hobbysta (ornamental fish breeder only)	More than 10 years ago	Beauty of animals and aquariums	The two options	Origin of the animal, Behavior of the animal, If the animal provides any function inside the aquarium, Ease in caring for the animal	Raised in captivity	Less than 100 R$	Between 10 and 20 fish	4	Yes	Physical shops and petshops, Online stores (free market, olx, aquarium store websites)	No	No	Once a week	Yes	Kept in the aquarium	Yes	I make a donation	Yes	aquarism forums, Internet searches (google, blogs), Trial and error	More fish will be available for trade in the future due to cultivation
192	2019-02-11 18:35:33	Hobbysta (ornamental fish breeder only)	More than 10 years ago	Beauty of animals and aquariums	Freshwater	Behavior of the animal, If the animal provides any function inside the aquarium	Raised in captivity	Between 100 and 500 R$	Between 20 and 50 fish	0	No	Physical shops and petshops, Aquarism groups on Facebook, Buy directly from suppliers	Yes	No	Once a week	Yes	Swapped with another aquarist for another fish	Yes	Trade with other hobbyists for other fish or aquarium equipment	No	aquarism forums, Internet searches (google, blogs), External access, Book consultation and specific literature, Consult specialized websites	Fewer fish will be available for trade in the future due to excessive catch and loss of natural habitats
193	2019-02-11 18:37:01	Hobbysta (ornamental fish breeder only)	Less than 1 year ago	Beauty of animals and aquariums	Freshwater	Animal behavior	Raised in captivity	Less than 100 R$	Less than 5 fish	1	No	Physical shops and petshops	Yes	No	Once a week	No	No	No	I make a donation	No	Internet searches (google, blogs), Consult specialized websites	More fish will be available for trade in the future due to cultivation
194	2019-02-11 18:38:37	Hobbysta (ornamental fish breeder only)	More than 10 years ago	Beauty of animals and aquariums	Freshwater	Compatibility with my aquarium and my fauna	Raised in captivity	Less than 100 R$	Between 10 and 20 fish	5	Yes	Physical shops and petshops	No	No	Once a week	Yes	You've given it to another aquarist	Yes	I make a donation	No	aquarism forums, Courses, Book consultation and specific literature	More fish will be available for trade in the future due to cultivation
195	2019-02-11 18:42:26	Hobbysta (ornamental fish breeder only)	Since my childhood	Beauty of animals and aquariums, Encouragement, recommendation or inheritance of friends or family	Freshwater	Aesthetics of the animal, Animal behavior	Raised in captivity	Between 100 and 500 R$	Between 10 and 20 fish	6	Yes	Physical shops and petshops, Aquarism groups on Facebook, Buy directly from suppliers	No	No	Once a month	Yes	You've given it to another aquarist	Yes	I make a donation	No	aquarism forums, Internet searches (google, blogs), Trial and error, Book consultation and specific literature, Consult specialized websites	More fish will be available for trade in the future due to cultivation
196	2019-02-11 18:46:31	Hobbysta (ornamental fish breeder only)	Since my childhood	Beauty of animals and aquariums	Freshwater	Animal behavior	Raised in captivity	Less than 100 R$	Less than 5 fish	1	No	Aquarism groups on Facebook	No	No	Once every 15 days	Yes	Kept in the aquarium	Yes	I make a donation	No	aquarism forums	More fish will be available for trade in the future due to cultivation
197	2019-02-11 18:47:12	Hobbysta (ornamental fish breeder only)	Between 1 and 5 years	Passion for fish and aquariums	Freshwater	Origin of the animal	Raised in captivity	Less than 100 R$	Between 5 and 10 fish	3	No	Physical shops and petshops	No	No	Once a week	Yes	Kept in the aquarium	Yes	I never fell apart	No	aquarism forums, Internet searches (google, blogs), Trial and error, Book consultation and specific literature, Consult specialized websites	Fewer fish will be available for trade in the future due to excessive catch and loss of natural habitats
198	2019-02-11 18:52:55	Hobbysta and Seller	Since my childhood	Encouragement, recommendation or inheritance of friends or family	Marine	Shop/seller recommendation, Aesthetics of the animal, Origin of the animal, Behavior of the animal, If the animal provides any function inside the aquarium, Ease in caring for the animal	Raised in captivity	Between 500 and 1,000 R$	Between 10 and 20 fish	5	Yes	Physical shops and petshops, Buy directly from suppliers	Yes	No	More than once a week	Yes	No	Yes	I make a donation	No	aquarism forums, Internet searches (google, blogs), Book consultation and specific literature, Consult specialized websites	More fish will be available for trade in the future due to cultivation
199	2019-02-11 19:03:56	Seller	More than 10 years ago	Beauty of animals and aquariums	Freshwater	Behavior of the animal, If the animal provides any function inside the aquarium	Raised in captivity	Between 100 and 500 R$	Between 20 and 50 fish	19	No	Physical shops and petshops	No	No	Once every 15 days	Yes	Swapped with another aquarist for another fish	No	Trade with other hobbyists for other fish or aquarium equipment	No	Trial and error	More fish will be available for trade in the future due to cultivation
200	2019-02-11 19:10:13	Hobbysta (ornamental fish breeder only)	Between 1 and 5 years	Beauty of animals and aquariums	Freshwater	Aesthetics of the animal	Raised in captivity	Less than 100 R$	Between 10 and 20 fish	1	Yes	Physical shops and petshops	No	No	Once a month	Yes	Kept in the aquarium	Yes	I make a donation	No	aquarism forums, Internet searches (google, blogs), Trial and error	Fewer fish will be available for trade in the future due to excessive catch and loss of natural habitats
201	2019-02-11 19:12:06	Hobbysta (ornamental fish breeder only)	Between 1 and 5 years	Beauty of animals and aquariums	Freshwater	Aesthetics of the animal, Animal behavior, Ease in caring for the animal	Raised in captivity	Between 100 and 500 R$	Between 10 and 20 fish	16	Yes	Physical shops and petshops	No	No	Once every 15 days	No	No	Yes	I make a donation	No	aquarism forums, Internet searches (google, blogs), Trial and error, Consult specialized websites	More fish will be available for trade in the future due to cultivation
202	2019-02-11 19:13:35	Hobbysta (ornamental fish breeder only)	Since my childhood	Beauty of animals and aquariums	Freshwater	Origin of the animal	Raised in captivity	Between 100 and 500 R$	Between 10 and 20 fish	11	No	Physical shops and petshops, Compra de amigos	No	No	Once a month	Yes	Kept in the aquarium	Yes	Trade with other hobbyists for other fish or aquarium equipment	No	aquarism forums, Internet searches (google, blogs), Trial and error, Book consultation and specific literature, Consult specialized websites	More fish will be available for trade in the future due to cultivation
203	2019-02-11 19:14:55	Hobbysta (ornamental fish breeder only)	More than 10 years ago	Beauty of animals and aquariums, Behavior - are easy animals to care for, do not make noise	Freshwater	Aesthetics of the animal, Behavior of the animal, If the animal provides any function inside the aquarium	Raised in captivity	Between 100 and 500 R$	Between 20 and 50 fish	6	Yes	Physical shops and petshops	No	No	Once every 15 days	Yes	You've given it to another aquarist	Yes	Trade with other hobbyists for other fish or aquarium equipment	No	Internet searches (google, blogs), Trial and error	More fish will be available for trade in the future due to cultivation
204	2019-02-11 19:15:03	Hobbysta (ornamental fish breeder only)	Between 1 and 5 years	Beauty of animals and aquariums	Freshwater	Aesthetics of the animal	Raised in captivity	Less than 100 R$	Between 10 and 20 fish	5	No	Physical shops and petshops	No	No	Once a week	Yes	You've given it to another aquarist	No	Trade with other hobbyists for other fish or aquarium equipment	No	aquarism forums	More fish will be available for trade in the future due to cultivation
205	2019-02-11 19:18:17	Hobbysta (ornamental fish breeder only)	Between 5 and 10 years	Beauty of animals and aquariums	Marine	Aesthetics of the animal, If the animal provides any function inside the aquarium	Wild caught in nature	Between 100 and 500 R$	Between 10 and 20 fish	7	No	Aquarism groups on Facebook, whatsapp groups	No	No	More than once a week	No	No	Yes	Sell	No	Internet searches (google, blogs)	Fewer fish will be available for trade in the future due to excessive catch and loss of natural habitats
206	2019-02-11 19:19:56	Hobbysta (ornamental fish breeder only)	Since my childhood	Beauty of animals and aquariums	Freshwater	Origin of the animal	Raised in captivity	Between 100 and 500 R$	Between 20 and 50 fish	2	No	Physical shops and petshops	No	No	Once a week	Yes	You've given it to another aquarist	Yes	Sell	No	Consult specialized websites	More fish will be available for trade in the future due to cultivation
207	2019-02-11 19:23:39	Hobbysta (ornamental fish breeder only)	More than 10 years ago	Encouragement, recommendation or inheritance of friends or family	Freshwater	Aesthetics of the animal, Animal behavior	Raised in captivity	Between 100 and 500 R$	Between 20 and 50 fish	8	No	Physical shops and petshops, Buy directly from suppliers	No	No	Once every 15 days	No	No	Yes	I make a donation	No	aquarism forums, Internet searches (google, blogs), External access, Trial and error, Book consultation and specific literature, Consult specialized websites	Fewer fish will be available for trade in the future due to excessive catch and loss of natural habitats
208	2019-02-11 19:34:04	Hobbysta (ornamental fish breeder only)	Between 5 and 10 years	Beauty of animals and aquariums	Freshwater	Animal behavior	Raised in captivity	Between 100 and 500 R$	Between 20 and 50 fish	12	No	Physical shops and petshops, Online stores (free market, olx, aquarium store websites), Aquarism groups on Facebook, Buy directly from suppliers	No	No	Once a week	Yes	You've given it to another aquarist	Yes	Sell	No	Internet searches (google, blogs), Trial and error, Book consultation and specific literature, Consult specialized websites	More fish will be available for trade in the future due to cultivation
209	2019-02-11 19:34:15	Hobbysta (ornamental fish breeder only)	Between 5 and 10 years	Beauty of animals and aquariums	Freshwater	Animal behavior	Raised in captivity	Between 100 and 500 R$	Between 20 and 50 fish	13	No	Physical shops and petshops, Online stores (free market, olx, aquarium store websites), Aquarism groups on Facebook, Buy directly from suppliers	No	No	Once a week	Yes	You've given it to another aquarist	Yes	Sell	No	Internet searches (google, blogs), Trial and error, Book consultation and specific literature, Consult specialized websites	More fish will be available for trade in the future due to cultivation
210	2019-02-11 19:36:31	Hobbysta (ornamental fish breeder only)	More than 10 years ago	Beauty of animals and aquariums	Freshwater	Aesthetics of the animal	Raised in captivity	Between 100 and 500 R$	Between 20 and 50 fish	7	No	Physical shops and petshops	Yes	No	Once a week	Yes	Kept in the aquarium	Yes	I make a donation	No	aquarism forums, Internet searches (google, blogs), Consult specialized websites	More fish will be available for trade in the future due to cultivation
211	2019-02-11 19:40:49	Hobbysta (ornamental fish breeder only)	Since my childhood	Beauty of animals and aquariums, Encouragement, recommendation or inheritance of friends or family	Freshwater	Animal price, Aesthetics of the animal, Behavior of the animal, If the animal provides any function inside the aquarium	Raised in captivity	Less than 100 R$	Between 5 and 10 fish	6	Yes	Physical shops and petshops	No	No	More than once a week	Yes	Kept in the aquarium	Yes	I make a donation	No	aquarism forums, Courses, Internet searches (google, blogs)	Fewer fish will be available for trade in the future due to excessive catch and loss of natural habitats
212	2019-02-11 19:42:12	Hobbysta (ornamental fish breeder only)	More than 10 years ago	Beauty of animals and aquariums	Marine	Origin of the animal, If the animal provides any function inside the aquarium	Raised in captivity	Between 100 and 500 R$	Between 5 and 10 fish	5	Yes	Physical shops and petshops	No	No	More than once a week	Yes	Kept in the aquarium	Yes	I make a donation	No	aquarism forums, Internet searches (google, blogs), Trial and error, Book consultation and specific literature, Consult specialized websites	More fish will be available for trade in the future due to cultivation
213	2019-02-11 19:54:06	Hobbysta (ornamental fish breeder only)	Since my childhood	Beauty of animals and aquariums	Freshwater	Behavior of the animal, If the animal provides any function inside the aquarium	Raised in captivity	Less than 100 R$	Between 5 and 10 fish	4	No	Physical shops and petshops	No	No	Once a month	Yes	Kept in the aquarium	Yes	I make a donation	Yes	aquarism forums, Internet searches (google, blogs), Consult specialized websites	More fish will be available for trade in the future due to cultivation
214	2019-02-11 19:54:26	Hobbysta (ornamental fish breeder only)	Between 1 and 5 years	Beauty of animals and aquariums	Freshwater	Animal behavior	Raised in captivity	Between 100 and 500 R$	Between 10 and 20 fish	5	No	Buy directly from suppliers	Yes	No	Once every 15 days	Yes	Sold	Yes	Trade with other hobbyists for other fish or aquarium equipment	No	aquarism forums, Consult specialized websites	More fish will be available for trade in the future due to cultivation
215	2019-02-11 19:55:04	Hobbysta and Seller	More than 10 years ago	Beauty of animals and aquariums	The two options	Shop/seller recommendation, Origin of the animal, Animal behavior, Ease in caring for the animal	Raised in captivity	More than 2 thousand R$	Between 20 and 50 fish	0	No	Buy directly from suppliers	Yes	No	More than once a week	Yes	Kept in the aquarium	Yes	Sell	No	aquarism forums, Courses, Internet searches (google, blogs), Trial and error, Book consultation and specific literature, Consult specialized websites	More fish will be available for trade in the future due to cultivation
216	2019-02-11 19:56:35	Hobbysta (ornamental fish breeder only)	Since my childhood	Beauty of animals and aquariums	Freshwater	Aesthetics of the animal	Raised in captivity	Between 100 and 500 R$	Between 20 and 50 fish	12		Physical shops and petshops	No	No	Once a week	Yes	Kept in the aquarium	Yes	Trade with other hobbyists for other fish or aquarium equipment	No	aquarism forums, Internet searches (google, blogs), External access, Trial and error, Book consultation and specific literature, Consult specialized websites	More fish will be available for trade in the future due to cultivation
217	2019-02-11 20:04:45	Hobbysta (ornamental fish breeder only)	Between 1 and 5 years	Beauty of animals and aquariums, Behavior - are easy animals to care for, do not make noise	Freshwater	Behavior of the animal, If the animal provides any function inside the aquarium, Ease in caring for the animal	Raised in captivity	Less than 100 R$	Between 20 and 50 fish	9	No	Physical shops and petshops	Yes	No	Once a month	Yes	Kept in the aquarium	Yes	I make a donation	No	aquarism forums, Internet searches (google, blogs)	More fish will be available for trade in the future due to cultivation
218	2019-02-11 20:07:25	Hobbysta (ornamental fish breeder only)	Since my childhood	Beauty of animals and aquariums	Freshwater	Animal price, Animal behavior, Ease in caring for the animal	Raised in captivity	Less than 100 R$	Between 10 and 20 fish	3	No	Physical shops and petshops, Aquarism groups on Facebook	No	No	Once a week	Yes	Swapped with another aquarist for another fish	Yes	Trade with other hobbyists for other fish or aquarium equipment	No	aquarism forums, Internet searches (google, blogs), Consult specialized websites	Fewer fish will be available for trade in the future due to excessive catch and loss of natural habitats
219	2019-02-11 20:10:20	Hobbysta (ornamental fish breeder only)	Since my childhood	Beauty of animals and aquariums	Freshwater	Aesthetics of the animal	Raised in captivity	Between 100 and 500 R$	Between 5 and 10 fish	3	No	Buy directly from suppliers	No	No	Once a week	Yes	Kept in the aquarium	Yes	I make a donation	No	Internet searches (google, blogs), External access, Trial and error	More fish will be available for trade in the future due to cultivation
220	2019-02-11 20:12:10	Hobbysta (ornamental fish breeder only)	Between 1 and 5 years	Beauty of animals and aquariums	Freshwater	If the animal provides any function inside the aquarium	Raised in captivity	Between 100 and 500 R$	Between 20 and 50 fish	6	No	Physical shops and petshops, Online stores (free market, olx, aquarium store websites)	Yes	No	Once a week	Yes	Swapped with another aquarist for another fish	Yes	Trade with other hobbyists for other fish or aquarium equipment	No	aquarism forums, Internet searches (google, blogs), External access, Consult specialized websites	More fish will be available for trade in the future due to cultivation
221	2019-02-11 20:23:40	Hobbysta (ornamental fish breeder only)	Since my childhood	Interest in ecology and biology (development) of animals/challenge in creating an ecosystem	Freshwater	Origin of the animal, Animal behavior	Raised in captivity	Between 100 and 500 R$	Entre 100 e 500 peixes	9	Yes	Physical shops and petshops, Online stores (free market, olx, aquarium store websites)	No	No	Once a week	Yes	Donated to other aquarists, Swapped with another aquarist for another fish	Yes	Troco com outros aquaristas, I make a donation, Devolve na loja	No	aquarism forums, Internet searches (google, blogs), Book consultation and specific literature, Consult specialized websites, Experiência própria	Fewer fish will be available for trade in the future due to excessive catch and loss of natural habitats
222	2019-02-11 20:24:13	Hobbysta (ornamental fish breeder only)	Since my childhood	Beauty of animals and aquariums	Freshwater	Ease in caring for the animal	Raised in captivity	Less than 100 R$	Less than 5 fish	5	No	Physical shops and petshops, Buy directly from suppliers	No	No	Once every 15 days	Yes	Kept in the aquarium	Yes	Sell	Yes	Internet searches (google, blogs)	More fish will be available for trade in the future due to cultivation
223	2019-02-11 20:31:51	Hobbysta (ornamental fish breeder only)	Since my childhood	Beauty of animals and aquariums, Encouragement, recommendation or inheritance of friends or family, Behavior - are easy animals to care for, do not make noise	Freshwater	Animal price, Shop/seller recommendation, Origin of the animal, Animal behavior	Raised in captivity	Between 100 and 500 R$	Between 10 and 20 fish	9	No	Physical shops and petshops, Capture in nature (lakes, rivers, ocean)	No	No	Once a month	Yes	Kept in the aquarium	Yes	I never fell apart	No	aquarism forums, Internet searches (google, blogs), Trial and error	More fish will be available for trade in the future due to cultivation
224	2019-02-11 20:32:34	Hobbysta (ornamental fish breeder only)	Between 5 and 10 years	Beauty of animals and aquariums	Freshwater	Behavior of the animal, If the animal provides any function inside the aquarium	Raised in captivity	Between 100 and 500 R$	Between 10 and 20 fish	5	No	Physical shops and petshops	No	No	Once a week	Yes	Kept in the aquarium	Yes	Trade with other hobbyists for other fish or aquarium equipment	No	aquarism forums, Internet searches (google, blogs), Trial and error	More fish will be available for trade in the future due to cultivation
225	2019-02-11 20:35:46	Hobbysta (ornamental fish breeder only)	Between 5 and 10 years	Beauty of animals and aquariums, Encouragement, recommendation or inheritance of friends or family	Freshwater	Origin of the animal, Animal behavior	Raised in captivity	Between 100 and 500 R$	Between 20 and 50 fish	14	No	Physical shops and petshops, Online stores (free market, olx, aquarium store websites), Aquarism groups on Facebook	Yes	No	Once every 15 days	Yes	Kept in the aquarium, Sold	Yes	I make a donation	No	aquarism forums, Internet searches (google, blogs), External access, Consult specialized websites	Fewer fish will be available for trade in the future due to excessive catch and loss of natural habitats
226	2019-02-11 20:47:10	Hobbysta (ornamental fish breeder only)	More than 10 years ago	Beauty of animals and aquariums	Freshwater	Origin of the animal, Behavior of the animal, If the animal provides any function inside the aquarium	Raised in captivity	Less than 100 R$	Between 5 and 10 fish	2	No	Physical shops and petshops	Yes	No	Once a month	Yes	Kept in the aquarium	Yes	I make a donation	No	aquarism forums, Internet searches (google, blogs), Consult specialized websites	More fish will be available for trade in the future due to cultivation
227	2019-02-11 20:49:18	Hobbysta (ornamental fish breeder only)	More than 10 years ago	Beauty of animals and aquariums	Freshwater	Animal behavior	Raised in captivity	Less than 100 R$	Between 5 and 10 fish	5	No	Physical shops and petshops	No	No	Once a week	Yes	You've given it to another aquarist	No	I make a donation	No	aquarism forums, Internet searches (google, blogs), Trial and error, Book consultation and specific literature, Consult specialized websites	Fewer fish will be available for trade in the future due to excessive catch and loss of natural habitats
228	2019-02-11 20:49:20	Hobbysta (ornamental fish breeder only)	More than 10 years ago	Beauty of animals and aquariums	Freshwater	Compatibility with my aquarium and my fauna	Raised in captivity	Less than 100 R$	Between 5 and 10 fish	5	Yes	Physical shops and petshops	No	No	Once every 15 days	Yes	You've given it to another aquarist	Yes	I make a donation	No	aquarism forums, Internet searches (google, blogs), Book consultation and specific literature, Amigos aquaristas	More fish will be available for trade in the future due to cultivation
229	2019-02-11 20:50:05	Hobbysta (ornamental fish breeder only)	More than 10 years ago	Beauty of animals and aquariums	Freshwater	Aesthetics of the animal, Behavior of the animal, If the animal provides any function inside the aquarium	Raised in captivity	Between 100 and 500 R$	Between 20 and 50 fish	10	No	Physical shops and petshops	Yes	No	More than once a week	Yes	Kept in the aquarium	No	I make a donation	No	aquarism forums	Fewer fish will be available for trade in the future due to excessive catch and loss of natural habitats
230	2019-02-11 20:50:58	Hobbysta (ornamental fish breeder only)	Less than 1 year ago	Beauty of animals and aquariums, Behavior - are easy animals to care for, do not make noise	Freshwater	Animal price, Shop/seller recommendation, Aesthetics of the animal, Origin of the animal, Animal behavior, Ease in caring for the animal	Raised in captivity	Between 100 and 500 R$	Less than 5 fish	2	No	Physical shops and petshops	Yes	No	Once every 15 days	No	You've given it to another aquarist	No	I make a donation	No	aquarism forums, Internet searches (google, blogs)	Fewer fish will be available for trade in the future due to excessive catch and loss of natural habitats
231	2019-02-11 20:55:56	Hobbysta and Seller	Between 1 and 5 years	Commercial interest - in addition to creating, you sell ornamental fish	Freshwater	Animal price, Aesthetics of the animal, If the animal provides any function inside the aquarium, Ease in caring for the animal	Raised in captivity	Less than 100 R$	Between 20 and 50 fish	2	No	Physical shops and petshops, Aquarism groups on Facebook	No	Yes	Every 6 months	Yes	Sold	Yes	Sell	No	Internet searches (google, blogs), Trial and error	More fish will be available for trade in the future due to cultivation
232	2019-02-11 21:06:47	Hobbysta (ornamental fish breeder only)	Between 1 and 5 years	Behavior - are easy animals to care for, do not make noise	Freshwater	Shop/seller recommendation	Raised in captivity	Less than 100 R$	Between 20 and 50 fish	3	No	Buy directly from suppliers	No	No	Once a week	No	Kept in the aquarium	No	Trade with other hobbyists for other fish or aquarium equipment	No	Internet searches (google, blogs)	More fish will be available for trade in the future due to cultivation
233	2019-02-11 21:09:49	Hobbysta (ornamental fish breeder only)	Since my childhood	Commercial interest - in addition to creating, you sell ornamental fish	Freshwater	Behavior of the animal, If the animal provides any function inside the aquarium	Raised in captivity	Between 100 and 500 R$	Between 10 and 20 fish	5	Yes	Physical shops and petshops, Buy directly from suppliers	No	No	Once a month	Yes	You've given it to another aquarist	Yes	Sell	No	Internet searches (google, blogs)	Fewer fish will be available for trade in the future due to excessive catch and loss of natural habitats
234	2019-02-11 21:10:50	Hobbysta and Seller	Since my childhood	Beauty of animals and aquariums	Freshwater	Aesthetics of the animal, Origin of the animal, Animal behavior	Raised in captivity	Less than 100 R$	Between 20 and 50 fish	10	No	Physical shops and petshops, Online stores (free market, olx, aquarium store websites), Aquarism groups on Facebook	Yes	No	Once a week	Yes	You've given it to another aquarist	No	Trade with other hobbyists for other fish or aquarium equipment	No	aquarism forums, Courses, Internet searches (google, blogs), Trial and error, Book consultation and specific literature, Consult specialized websites	Fewer fish will be available for trade in the future due to excessive catch and loss of natural habitats
235	2019-02-11 21:21:26	Hobbysta (ornamental fish breeder only)	Between 1 and 5 years	Beauty of animals and aquariums	Freshwater	Animal price, Behavior of the animal, If the animal provides any function inside the aquarium	Raised in captivity	Between 500 and 1,000 R$	Between 20 and 50 fish	5	Yes	Physical shops and petshops	No	No	Once a week	Yes	Kept in the aquarium	Yes	I make a donation	No	aquarism forums, Courses, Internet searches (google, blogs), Trial and error, Book consultation and specific literature, Consult specialized websites	More fish will be available for trade in the future due to cultivation
236	2019-02-11 21:22:23	Hobbysta (ornamental fish breeder only)	More than 10 years ago	Beauty of animals and aquariums	Freshwater	Animal behavior	Raised in captivity	Less than 100 R$	Between 20 and 50 fish	4	Yes	Physical shops and petshops	Yes	No	More than once a week	Yes	You've given it to another aquarist	Yes	I make a donation	No	aquarism forums, Internet searches (google, blogs), External access, Book consultation and specific literature	More fish will be available for trade in the future due to cultivation
237	2019-02-11 21:30:18	Hobbysta (ornamental fish breeder only)	Between 1 and 5 years	Beauty of animals and aquariums	Freshwater	Origin of the animal, If the animal provides any function inside the aquarium	Raised in captivity	Less than 100 R$	Between 20 and 50 fish	6	No	Physical shops and petshops, Aquarism groups on Facebook	Yes	No	Once a week	Yes	Kept in the aquarium	Yes	I make a donation	No	Book consultation and specific literature, Consult specialized websites	More fish will be available for trade in the future due to cultivation
238	2019-02-11 21:30:56	Hobbysta (ornamental fish breeder only)	Between 1 and 5 years	Beauty of animals and aquariums	Freshwater	Animal price, If the animal provides any function inside the aquarium	Raised in captivity	Less than 100 R$	Between 10 and 20 fish	6	Yes	Physical shops and petshops, Aquarism groups on Facebook	No	Yes	Once a month	Yes	You've given it to another aquarist	Yes	Trade with other hobbyists for other fish or aquarium equipment	No	aquarism forums, Internet searches (google, blogs), Consult specialized websites	More fish will be available for trade in the future due to cultivation
239	2019-02-11 21:38:24	Hobbysta and Seller	Less than 1 year ago	Passion for fish and aquariums	Freshwater	Animal price, Aesthetics of the animal, Behavior of the animal, If the animal provides any function inside the aquarium, Ease in caring for the animal	Raised in captivity	Between 100 and 500 R$	Entre 50 e 100 peixes	12	Yes	Physical shops and petshops, Aquarism groups on Facebook, Buy directly from suppliers	Yes	Yes	Once a week	Yes	Sold	Yes	Trade with other hobbyists for other fish or aquarium equipment	No	aquarism forums, Internet searches (google, blogs), Book consultation and specific literature, Consult specialized websites	More fish will be available for trade in the future due to cultivation
240	2019-02-11 21:38:26	Hobbysta (ornamental fish breeder only)	Since my childhood	Beauty of animals and aquariums	Freshwater	Animal behavior	Raised in captivity	Between 100 and 500 R$	Between 10 and 20 fish	1	Yes	Physical shops and petshops	No	No	Once a week	Yes	Kept in the aquarium	Yes	I never fell apart	No	aquarism forums, Internet searches (google, blogs), External access, Trial and error, Book consultation and specific literature, Consult specialized websites	More fish will be available for trade in the future due to cultivation
241	2019-02-11 21:48:03	Hobbysta (ornamental fish breeder only)	More than 10 years ago	Beauty of animals and aquariums	The two options	Aesthetics of the animal, Origin of the animal, Behavior of the animal, If the animal provides any function inside the aquarium, Ease in caring for the animal	Indifferent	Between 100 and 500 R$	Between 10 and 20 fish	8	Yes	Physical shops and petshops	No	No	Once a month	No	No	Yes	Trade with other hobbyists for other fish or aquarium equipment	No	External access	Fewer fish will be available for trade in the future due to excessive catch and loss of natural habitats
242	2019-02-11 21:54:40	Hobbysta (ornamental fish breeder only)	More than 10 years ago	Beauty of animals and aquariums	Freshwater	Origin of the animal, Animal behavior	Raised in captivity	Between 100 and 500 R$	Between 20 and 50 fish	15	Yes	Physical shops and petshops	Yes	No	Once a week	Yes	Kept in the aquarium	Yes	I make a donation	No	aquarism forums, Internet searches (google, blogs), External access, Trial and error, Book consultation and specific literature, Consult specialized websites	More fish will be available for trade in the future due to cultivation
243	2019-02-11 21:59:12	Hobbysta and Seller	More than 10 years ago	Beauty of animals and aquariums	The two options	Aesthetics of the animal	Raised in captivity	Between 100 and 500 R$	Between 10 and 20 fish	13	Yes	Physical shops and petshops	No	Yes	More than once a week	Yes	You've given it to another aquarist	No	Sell	No	aquarism forums	Fewer fish will be available for trade in the future due to excessive catch and loss of natural habitats
244	2019-02-11 22:13:25	Hobbysta (ornamental fish breeder only)	More than 10 years ago	Beauty of animals and aquariums	Freshwater	Behavior of the animal, If the animal provides any function inside the aquarium	Raised in captivity	Less than 100 R$	Less than 5 fish	3	No	Physical shops and petshops	No	No	Once a month	No	No	Yes	I make a donation	No	aquarism forums, Internet searches (google, blogs), Trial and error, Consult specialized websites	More fish will be available for trade in the future due to cultivation
245	2019-02-11 22:28:22	Hobbysta and Seller	Since my childhood	Commercial interest - in addition to creating, you sell ornamental fish, Beauty of animals and aquariums	Marine	Origin of the animal, Behavior of the animal, If the animal provides any function inside the aquarium	Raised in captivity	Less than 100 R$	Less than 5 fish	3	Yes	Physical shops and petshops	Yes	No	Once every 15 days	Yes	You've given it to another aquarist	Yes	I make a donation	No	aquarism forums, Courses, Internet searches (google, blogs), External access, Trial and error, Book consultation and specific literature, Consult specialized websites	More fish will be available for trade in the future due to cultivation
246	2019-02-11 22:53:57	Hobbysta and Seller	Since my childhood	Encouragement, recommendation or inheritance of friends or family	Freshwater	Ease in caring for the animal	Raised in captivity	Less than 100 R$	Between 5 and 10 fish	7	No	Physical shops and petshops	No	No	Once every 15 days	Yes	Sold	Yes	I never fell apart	No	Internet searches (google, blogs), amigos do hobby	More fish will be available for trade in the future due to cultivation
247	2019-02-11 23:10:17	Hobbysta (ornamental fish breeder only)	Between 1 and 5 years	Beauty of animals and aquariums	Freshwater	Origin of the animal	Raised in captivity	Between 500 and 1,000 R$	Between 10 and 20 fish	1	No	Buy directly from suppliers	No	No	More than once a week	No	No	Yes	I never fell apart	No	aquarism forums, Internet searches (google, blogs), External access, Trial and error	More fish will be available for trade in the future due to cultivation
248	2019-02-11 23:18:01	Hobbysta (ornamental fish breeder only)	Since my childhood	Beauty of animals and aquariums, Behavior - are easy animals to care for, do not make noise	Freshwater	Animal price, Shop/seller recommendation, Aesthetics of the animal, Origin of the animal, Behavior of the animal, If the animal provides any function inside the aquarium, Ease in caring for the animal	Raised in captivity	I don't spend anything	Nenhum	0	No	Physical shops and petshops, Online stores (free market, olx, aquarium store websites), Aquarism groups on Facebook, Buy directly from suppliers, Capture in nature (lakes, rivers, ocean)	Yes	No	Once a month	Yes	Kept in the aquarium	Yes	Sell	No	aquarism forums, Courses, Internet searches (google, blogs), External access, Trial and error, Book consultation and specific literature, Consult specialized websites	More fish will be available for trade in the future due to cultivation
249	2019-02-11 23:35:27	Hobbysta (ornamental fish breeder only)	Between 1 and 5 years	Beauty of animals and aquariums	Freshwater	Compatibility with my aquarium and my fauna	Raised in captivity	Less than 100 R$	Between 5 and 10 fish	1	No	Physical shops and petshops	No	No	Once a month	Yes	Kept in the aquarium	Yes	I make a donation	No	aquarism forums, Internet searches (google, blogs), Consult specialized websites	More fish will be available for trade in the future due to cultivation
250	2019-02-11 23:51:53	Hobbysta (ornamental fish breeder only)	Since my childhood	Beauty of animals and aquariums	Freshwater	Aesthetics of the animal, Origin of the animal, Animal behavior	Raised in captivity	Between 100 and 500 R$	Between 20 and 50 fish	9	No	Physical shops and petshops, Buy directly from suppliers	No	No	Once a week	Yes	Kept in the aquarium	Yes	I make a donation	No	Trial and error, Book consultation and specific literature, As tentativas me ajudaram. Pois comecei a criar em 1980 quando garoto. Hoje sou um senhor de 50 anos e ainda continuo criando.	More fish will be available for trade in the future due to cultivation
251	2019-02-12 00:26:59	Hobbysta and Seller	Between 1 and 5 years	Commercial interest - in addition to creating, you sell ornamental fish, Beauty of animals and aquariums, Therapy/depression/anxiety/calm	The two options	Origin of the animal, Animal behavior	Raised in captivity	Between 100 and 500 R$	Between 20 and 50 fish	18	Yes	Buy directly from suppliers	Yes	No	Once every 15 days	Yes	You've given it to another aquarist	Yes	I make a donation, Sell	No	aquarism forums, Internet searches (google, blogs)	Fewer fish will be available for trade in the future due to excessive catch and loss of natural habitats
252	2019-02-12 00:27:32	Hobbysta (ornamental fish breeder only)	Between 1 and 5 years	Beauty of animals and aquariums	Freshwater	Animal price, Origin of the animal, Ease in caring for the animal	Raised in captivity	Less than 100 R$	Between 5 and 10 fish	3	No	Physical shops and petshops	No	No	Once a week	Yes	Kept in the aquarium	Yes	I make a donation	No	aquarism forums, Internet searches (google, blogs), Trial and error	Fewer fish will be available for trade in the future due to excessive catch and loss of natural habitats
253	2019-02-12 00:44:02	Hobbysta (ornamental fish breeder only)	Less than 1 year ago	Beauty of animals and aquariums	Freshwater	Aesthetics of the animal, Animal behavior	Raised in captivity	Less than 100 R$	Between 5 and 10 fish	4	No	Physical shops and petshops	Yes	No	Once every 15 days	No	You've given it to another aquarist	Yes	I make a donation	No	aquarism forums, Internet searches (google, blogs), Consult specialized websites	Fewer fish will be available for trade in the future due to excessive catch and loss of natural habitats
254	2019-02-12 00:56:08	Hobbysta (ornamental fish breeder only)	Less than 1 year ago	Beauty of animals and aquariums	Freshwater	Ease in caring for the animal	Raised in captivity	Between 100 and 500 R$	Between 5 and 10 fish	2	No	Physical shops and petshops, Aquarism groups on Facebook	No	No	Once a week	No	No	Yes	Trade with other hobbyists for other fish or aquarium equipment	No	aquarism forums, Internet searches (google, blogs), Consult specialized websites	Fewer fish will be available for trade in the future due to excessive catch and loss of natural habitats
255	2019-02-12 02:07:03	Hobbysta (ornamental fish breeder only)	Between 1 and 5 years	Beauty of animals and aquariums, Encouragement, recommendation or inheritance of friends or family	Freshwater	Animal price, Aesthetics of the animal, Origin of the animal, Behavior of the animal, If the animal provides any function inside the aquarium	Raised in captivity	Less than 100 R$	Between 10 and 20 fish	7	No	Physical shops and petshops	No	No	Once a week	No	No	No	Trade with other hobbyists for other fish or aquarium equipment	No	aquarism forums, Courses, Internet searches (google, blogs), Trial and error, Book consultation and specific literature, Consult specialized websites	Fewer fish will be available for trade in the future due to excessive catch and loss of natural habitats
256	2019-02-12 05:22:55	Hobbysta and Seller	More than 10 years ago	Beauty of animals and aquariums, Behavior - are easy animals to care for, do not make noise	The two options	Aesthetics of the animal, Origin of the animal	Indifferent	Between 100 and 500 R$	Between 20 and 50 fish	20	Yes	Buy directly from suppliers	Yes	No	More than once a week	Yes	Kept in the aquarium, Sold, Donated to other aquarists, Traded with other aquarists	Yes	Sell	No	aquarism forums, Courses, Trial and error, Book consultation and specific literature	More fish will be available for trade in the future due to cultivation
257	2019-02-12 05:36:29	Hobbysta (ornamental fish breeder only)	Since my childhood	Beauty of animals and aquariums, Encouragement, recommendation or inheritance of friends or family	Freshwater	Animal price, Aesthetics of the animal, Behavior of the animal, If the animal provides any function inside the aquarium, Compatibility with my aquarium and my fauna	Raised in captivity	Less than 100 R$	Between 20 and 50 fish	5	No	Physical shops and petshops	No	No	Once a week	Yes	Kept in the aquarium	Yes	Trade with other hobbyists for other fish or aquarium equipment	No	aquarism forums, Courses, Internet searches (google, blogs), Trial and error, Book consultation and specific literature, Consult specialized websites	More fish will be available for trade in the future due to cultivation
258	2019-02-12 05:41:25	Hobbysta (ornamental fish breeder only)	Since my childhood	Therapy/depression/anxiety/calm	Freshwater	Origin of the animal, Animal behavior	Raised in captivity	Between 100 and 500 R$	Between 10 and 20 fish	9	Yes	Physical shops and petshops, Buy directly from suppliers	No	Yes	Once every 15 days	Yes	Kept in the aquarium, Donated to other aquarists	Yes	I make a donation	No	aquarism forums, Internet searches (google, blogs), Trial and error, Book consultation and specific literature, Consult specialized websites, Faço faculdade de veterinária, possui na grade curricular a materia e alguns Courses relacionados	More fish will be available for trade in the future due to cultivation
259	2019-02-12 05:45:07	Hobbysta (ornamental fish breeder only)	Since my childhood	Beauty of animals and aquariums	Freshwater	Ease in caring for the animal	Raised in captivity	Less than 100 R$	Between 20 and 50 fish	10	No	Physical shops and petshops	No	No	Once a week	Yes	Kept in the aquarium	No	Sell	No	Consult specialized websites	More fish will be available for trade in the future due to cultivation
260	2019-02-12 06:14:34	Hobbysta (ornamental fish breeder only)	Since my childhood	Beauty of animals and aquariums	Freshwater	Aesthetics of the animal, Origin of the animal, animal health	Raised in captivity	Between 500 and 1,000 R$	Between 20 and 50 fish	9	No	Physical shops and petshops	No	No	Once every 15 days	Yes	Sold	Yes	Sell	No	aquarism forums, Internet searches (google, blogs), External access, Trial and error, Consult specialized websites	More fish will be available for trade in the future due to cultivation
261	2019-02-12 06:54:21	Hobbysta (ornamental fish breeder only)	Between 1 and 5 years	Beauty of animals and aquariums	Freshwater	Origin of the animal, Animal behavior, Ease in caring for the animal	Raised in captivity	Between 100 and 500 R$	Between 20 and 50 fish	4	Yes	Aquarism groups on Facebook	No	No	More than once a week	Yes	Kept in the aquarium	No	I make a donation	No	aquarism forums, Internet searches (google, blogs), Trial and error, Book consultation and specific literature, Consult specialized websites	More fish will be available for trade in the future due to cultivation
262	2019-02-12 07:11:15	Hobbysta (ornamental fish breeder only)	Between 1 and 5 years	Encouragement, recommendation or inheritance of friends or family	Freshwater	Aesthetics of the animal, Behavior of the animal, If the animal provides any function inside the aquarium	Raised in captivity	Between 100 and 500 R$	Between 10 and 20 fish	3	No	Physical shops and petshops	Yes	No	Once a month	Yes	You've given it to another aquarist	No	I make a donation	No	aquarism forums, Internet searches (google, blogs), Amigos com experiência	Fewer fish will be available for trade in the future due to excessive catch and loss of natural habitats
263	2019-02-12 07:23:52	Hobbysta (ornamental fish breeder only)	Less than 1 year ago	Beauty of animals and aquariums	Freshwater	Aesthetics of the animal	Raised in captivity	Less than 100 R$	Between 10 and 20 fish	1	No	Physical shops and petshops	Yes	No	Once a week	No	No	Yes	I make a donation	No	Internet searches (google, blogs), Consult specialized websites	Fewer fish will be available for trade in the future due to excessive catch and loss of natural habitats
264	2019-02-12 07:33:04	Hobbysta (ornamental fish breeder only)	Between 1 and 5 years	Beauty of animals and aquariums	Marine	Behavior of the animal, If the animal provides any function inside the aquarium	Raised in captivity	Between 100 and 500 R$	Between 5 and 10 fish	6	Yes	Physical shops and petshops, Aquarism groups on Facebook, Buy directly from suppliers	No	No	Once every 15 days	No	No	Yes	Sell	No	aquarism forums, Internet searches (google, blogs)	Fewer fish will be available for trade in the future due to excessive catch and loss of natural habitats
265	2019-02-12 07:38:14	Hobbysta and Seller	More than 10 years ago	Beauty of animals and aquariums	Freshwater	Aesthetics of the animal	Raised in captivity	Between 500 and 1,000 R$	more than a thousand	29	No	Compro de fornecedores, Faço reprodução	No	Yes	Once a week	Yes	Kept in the aquarium, Sold	Yes	Sell	No	aquarism forums, Internet searches (google, blogs), Book consultation and specific literature, Consult specialized websites	More fish will be available for trade in the future due to cultivation
266	2019-02-12 08:19:16	Hobbysta (ornamental fish breeder only)	More than 10 years ago	Beauty of animals and aquariums	Freshwater	Aesthetics of the animal, Animal behavior	Raised in captivity	Less than 100 R$	Between 10 and 20 fish	8	No	Physical shops and petshops, Grupos de whatsapp	No	No	Once a week	Yes	You've given it to another aquarist	Yes	I make a donation	No	aquarism forums, Trial and error	More fish will be available for trade in the future due to cultivation
267	2019-02-12 08:38:39	Hobbysta (ornamental fish breeder only)	Between 1 and 5 years	Beauty of animals and aquariums	Freshwater	Animal price, Aesthetics of the animal, Animal behavior, Ease in caring for the animal	Raised in captivity	Less than 100 R$	Between 10 and 20 fish	5	Yes	Physical shops and petshops	Yes	No	Once every 15 days	No	No	Yes	I make a donation	No	aquarism forums, Internet searches (google, blogs), Trial and error, Consult specialized websites	More fish will be available for trade in the future due to cultivation	On the Internet, With fellow aquarists
268	2019-02-12 09:10:18	Hobbysta (ornamental fish breeder only)	Less than 1 year ago	Beauty of animals and aquariums	Freshwater	Shop/seller recommendation, Animal behavior	Raised in captivity	Less than 100 R$	Less than 5 fish	3	No	Physical shops and petshops	No	No	Once a week	Yes	Kept in the aquarium	Yes	I make a donation	No	aquarism forums, Internet searches (google, blogs), Consult specialized websites	Fewer fish will be available for trade in the future due to excessive catch and loss of natural habitats	With specialized professionals, On the Internet, With fellow aquarists
269	2019-02-12 09:12:51	Hobbysta (ornamental fish breeder only)	Between 1 and 5 years	Beauty of animals and aquariums	Freshwater	Aesthetics of the animal, Origin of the animal, Ease in caring for the animal	Raised in captivity	Less than 100 R$	Less than 5 fish	1	Yes	Physical shops and petshops	No	No	Once a week	Yes	Kept in the aquarium	Yes	I make a donation	No	aquarism forums, Courses, Internet searches (google, blogs), Trial and error, Book consultation and specific literature, Consult specialized websites	Fewer fish will be available for trade in the future due to excessive catch and loss of natural habitats	On the Internet, With fellow aquarists
270	2019-02-12 09:13:24	Hobbysta (ornamental fish breeder only)	Since my childhood	Beauty of animals and aquariums	Freshwater	Aesthetics of the animal	Raised in captivity	Less than 100 R$	Between 20 and 50 fish	2	Yes	Buy directly from suppliers	No	No	More than once a week	Yes	Kept in the aquarium	Yes	I make a donation	No	aquarism forums, Internet searches (google, blogs), Trial and error, Book consultation and specific literature, Consult specialized websites	More fish will be available for trade in the future due to cultivation	On the Internet, With fellow aquarists
271	2019-02-12 09:22:30	Hobbysta (ornamental fish breeder only)	Since my childhood	Beauty of animals and aquariums	The two options	Animal price, Aesthetics of the animal, Behavior of the animal, If the animal provides any function inside the aquarium	Raised in captivity	Less than 100 R$	Less than 5 fish	1	Yes	Physical shops and petshops, Online stores (free market, olx, aquarium store websites), Aquarism groups on Facebook, Buy directly from suppliers	Yes	Yes	Once a week	Yes	Kept in the aquarium, You've given it to another aquarist	Yes	Sell, I make a donation, Trade with other hobbyists for other fish or aquarium equipment	No	aquarism forums, Courses, Internet searches (google, blogs), Trial and error, Book consultation and specific literature, Consult specialized websites	More fish will be available for trade in the future due to cultivation	On the Internet, With fellow aquarists
272	2019-02-12 09:35:07	Hobbysta (ornamental fish breeder only)	Between 1 and 5 years	Interest in ecology and biology (development) of animals/challenge in creating an ecosystem	Freshwater	Origin of the animal	Wild caught in nature	Between 100 and 500 R$	Between 5 and 10 fish	4	No	Physical shops and petshops	No	No	Once a month	Yes	You've given it to another aquarist	Yes	Trade with other hobbyists for other fish or aquarium equipment	No	aquarism forums	Fewer fish will be available for trade in the future due to excessive catch and loss of natural habitats
273	2019-02-12 10:09:39	Hobbysta (ornamental fish breeder only)	Between 1 and 5 years	Beauty of animals and aquariums, Encouragement, recommendation or inheritance of friends or family	Freshwater	Animal price, Aesthetics of the animal, Animal behavior, Ease in caring for the animal	Raised in captivity	Between 100 and 500 R$	Between 20 and 50 fish	8	Yes	Physical shops and petshops, Buy directly from suppliers	No	No	Once a week	Yes	Sold	Yes	I make a donation, Trade with other hobbyists for other fish or aquarium equipment	No	aquarism forums, Internet searches (google, blogs), Trial and error, Consult specialized websites	More fish will be available for trade in the future due to cultivation	On the Internet, With fellow aquarists
274	2019-02-12 10:29:37	Hobbysta (ornamental fish breeder only)	Less than 1 year ago	Commercial interest - in addition to creating, you sell ornamental fish, Beauty of animals and aquariums	Freshwater	Animal price, Aesthetics of the animal	Raised in captivity	Between 100 and 500 R$	Between 5 and 10 fish	5	Yes	Physical shops and petshops, Buy directly from suppliers	No	No	Every 3 months	No	No	Yes	Sell, Trade with other hobbyists for other fish or aquarium equipment	No		More fish will be available for trade in the future due to cultivation	With fellow aquarists, I don't seek treatment
275	2019-02-12 10:39:24	Hobbysta (ornamental fish breeder only)	Between 1 and 5 years	Beauty of animals and aquariums	Freshwater	Behavior of the animal, If the animal provides any function inside the aquarium	Raised in captivity	Less than 100 R$	Between 20 and 50 fish	9	No	Physical shops and petshops, Aquarism groups on Facebook	Yes	No	Once a month	Yes	Kept in the aquarium, Sold, You've given it to another aquarist	Yes	Sell, I make a donation	No	aquarism forums, Internet searches (google, blogs), Consult specialized websites, Youtube	Fewer fish will be available for trade in the future due to excessive catch and loss of natural habitats	On the Internet, With fellow aquarists
276	2019-02-12 10:40:13	Hobbysta (ornamental fish breeder only)	Since my childhood	Beauty of animals and aquariums	Freshwater	Origin of the animal	Raised in captivity	Between 100 and 500 R$	Between 20 and 50 fish	11	Yes	Physical shops and petshops, Buy directly from suppliers	No	No	Once a month	Yes	Kept in the aquarium	No	Sell, I make a donation	No	Book consultation and specific literature, Consult specialized websites	Fewer fish will be available for trade in the future due to excessive catch and loss of natural habitats	With specialized professionals, With fellow aquarists
277	2019-02-12 10:44:22	Seller	Since my childhood	Beauty of animals and aquariums	Freshwater	Aesthetics of the animal, If the animal provides any function inside the aquarium	Raised in captivity	More than 2 thousand R$	more than a thousand	2	No	own reproduction	Yes	No	Once every 15 days	Yes	Sold	Yes	Sell	Yes	Faculty	More fish will be available for trade in the future due to cultivation	With specialized professionals
278	2019-02-12 11:37:46	Hobbysta (ornamental fish breeder only)	Since my childhood	Beauty of animals and aquariums	Freshwater	Origin of the animal, Animal behavior	Raised in captivity	Less than 100 R$	Less than 5 fish	1	Yes	Physical shops and petshops, Aquarism groups on Facebook	Yes	No	Once a week	No	No	Yes	I make a donation, Trade with other hobbyists for other fish or aquarium equipment	No	aquarism forums, Internet searches (google, blogs), Trial and error, Consult specialized websites	Fewer fish will be available for trade in the future due to excessive catch and loss of natural habitats	On the Internet, With fellow aquarists
279	2019-02-12 11:39:15	Hobbysta (ornamental fish breeder only)	Less than 1 year ago	Beauty of animals and aquariums	The two options	Aesthetics of the animal, Compatibility with my aquarium and my fauna	Raised in captivity	Less than 100 R$	Between 20 and 50 fish	7	Yes	Physical shops and petshops, Aquarism groups on Facebook	No	No	Once a week	Yes	Swapped with another aquarist for another fish	No	Trade with other hobbyists for other fish or aquarium equipment	No	aquarism forums, Internet searches (google, blogs), External access, Trial and error, Book consultation and specific literature, Consult specialized websites	More fish will be available for trade in the future due to cultivation	With specialized professionals
280	2019-02-12 12:01:25	Hobbysta (ornamental fish breeder only)	Since my childhood	Beauty of animals and aquariums	Freshwater	Aesthetics of the animal, Behavior of the animal, If the animal provides any function inside the aquarium, Ease in caring for the animal	Raised in captivity	Between 100 and 500 R$	Between 20 and 50 fish	2	No	Physical shops and petshops, Online stores (free market, olx, aquarium store websites), Aquarism groups on Facebook, Buy directly from suppliers	No	No	Once a week	Yes	Kept in the aquarium, You've given it to another aquarist	Yes	I make a donation, Trade with other hobbyists for other fish or aquarium equipment	No	aquarism forums, Courses, Internet searches (google, blogs), Trial and error, Book consultation and specific literature, Consult specialized websites	More fish will be available for trade in the future due to cultivation	With specialized professionals, On the Internet, With fellow aquarists
281	2019-02-12 12:52:24	Hobbysta (ornamental fish breeder only)	Since my childhood	Beauty of animals and aquariums	Freshwater	Animal behavior	Raised in captivity	Less than 100 R$	Nenhum	10	No	Physical shops and petshops, Buy directly from suppliers	No	No	Once every 15 days	Yes	Kept in the aquarium	No	Sell, I make a donation, Trade with other hobbyists for other fish or aquarium equipment	No	aquarism forums, Internet searches (google, blogs), External access, Trial and error, Book consultation and specific literature, Consult specialized websites	More fish will be available for trade in the future due to cultivation	With fellow aquarists
282	2019-02-12 13:45:32	Hobbysta (ornamental fish breeder only)	Since my childhood	Beauty of animals and aquariums	Freshwater	Aesthetics of the animal, Origin of the animal, Behavior of the animal, If the animal provides any function inside the aquarium	Indifferent	Less than 100 R$	more than a thousand	6	Yes	Physical shops and petshops	Yes	No	Once a week	Yes	Kept in the aquarium, You've given it to another aquarist	Yes	I make a donation	No	aquarism forums, Internet searches (google, blogs), Book consultation and specific literature, Consult specialized websites	Fewer fish will be available for trade in the future due to excessive catch and loss of natural habitats	On the Internet, With fellow aquarists
283	2019-02-12 13:50:07	Hobbysta (ornamental fish breeder only)	More than 10 years ago	Beauty of animals and aquariums	Marine	Animal price, Origin of the animal, Animal behavior	Raised in captivity	Between 100 and 500 R$	Between 10 and 20 fish	12	Yes	Physical shops and petshops, Online stores (free market, olx, aquarium store websites)	No	No	Once a month	No	No	Yes	I make a donation, Trade with other hobbyists for other fish or aquarium equipment	No	aquarism forums, Internet searches (google, blogs), Trial and error, Book consultation and specific literature, Consult specialized websites, Dicas de amigos mais experientes.	More fish will be available for trade in the future due to cultivation	With specialized professionals
284	2019-02-12 14:12:01	Hobbysta (ornamental fish breeder only)	Between 1 and 5 years	Beauty of animals and aquariums, Encouragement, recommendation or inheritance of friends or family, Behavior - are easy animals to care for, do not make noise	Freshwater	Animal behavior	Raised in captivity	Less than 100 R$	Less than 5 fish	2	No	Physical shops and petshops	No	No	Once a week	No	No	Yes	I never fell apart	No	aquarism forums, Internet searches (google, blogs), Trial and error, Book consultation and specific literature, Consult specialized websites	Fewer fish will be available for trade in the future due to excessive catch and loss of natural habitats	With specialized professionals, On the Internet, With fellow aquarists
285	2019-02-12 14:30:19	Hobbysta (ornamental fish breeder only)	Since my childhood	Beauty of animals and aquariums, Behavior - are easy animals to care for, do not make noise	Freshwater	Aesthetics of the animal, Origin of the animal, Behavior of the animal, If the animal provides any function inside the aquarium	Raised in captivity	Less than 100 R$	Between 10 and 20 fish	7	No	Physical shops and petshops	Yes	No	Once a week	Yes	Kept in the aquarium	No	I make a donation	No	aquarism forums, Internet searches (google, blogs), Trial and error, Book consultation and specific literature, Consult specialized websites	Fewer fish will be available for trade in the future due to excessive catch and loss of natural habitats	With specialized professionals, On the Internet, With fellow aquarists
286	2019-02-12 15:12:21	Hobbysta (ornamental fish breeder only)	Since my childhood	Passion for fish and aquariums	Freshwater	Origin of the animal, Animal behavior	Raised in captivity	Between 100 and 500 R$	Between 20 and 50 fish	10	No	Physical shops and petshops	No	No	Once a week	Yes	Kept in the aquarium, You've given it to another aquarist, Swapped with another aquarist for another fish	Yes	I make a donation, Trade with other hobbyists for other fish or aquarium equipment	No	aquarism forums, Internet searches (google, blogs), External access, Consult specialized websites	More fish will be available for trade in the future due to cultivation	With specialized professionals, On the Internet, With fellow aquarists
287	2019-02-12 15:36:50	Hobbysta (ornamental fish breeder only)	Since my childhood	Beauty of animals and aquariums	The two options	Animal price, Aesthetics of the animal, Origin of the animal, Behavior of the animal, If the animal provides any function inside the aquarium	Raised in captivity	Between 100 and 500 R$	Between 10 and 20 fish	6	Yes	Physical shops and petshops, Online stores (free market, olx, aquarium store websites), Aquarism groups on Facebook, Buy directly from suppliers	No	No	Once a week	Yes	Sold, You've given it to another aquarist	Yes	Sell, I make a donation, Trade with other hobbyists for other fish or aquarium equipment	No	aquarism forums, Internet searches (google, blogs), Trial and error, Book consultation and specific literature, Consult specialized websites	More fish will be available for trade in the future due to cultivation	With specialized professionals, On the Internet, With fellow aquarists
288	2019-02-12 15:39:17	Hobbysta (ornamental fish breeder only)	Between 1 and 5 years	Beauty of animals and aquariums	The two options	Aesthetics of the animal, Origin of the animal, Animal behavior	Raised in captivity	Between 100 and 500 R$	Between 20 and 50 fish	5	Yes	Physical shops and petshops	No	No	More than once a week	No	No	No	I make a donation	No	aquarism forums, Internet searches (google, blogs), Consult specialized websites	More fish will be available for trade in the future due to cultivation	With specialized professionals
289	2019-02-12 15:42:26	Hobbysta (ornamental fish breeder only)	Less than 1 year ago	Beauty of animals and aquariums	The two options	Animal price, Shop/seller recommendation, Aesthetics of the animal, Animal behavior	Raised in captivity	Between 100 and 500 R$	Between 10 and 20 fish	1	No	Physical shops and petshops	No	No	More than once a week	No	Kept in the aquarium	No	Sell	No	Internet searches (google, blogs), Book consultation and specific literature, Consult specialized websites	More fish will be available for trade in the future due to cultivation
290	2019-02-12 15:46:14	Hobbysta (ornamental fish breeder only)	Between 1 and 5 years	Beauty of animals and aquariums	Freshwater	Animal behavior	Raised in captivity	Less than 100 R$	Between 5 and 10 fish	4	Yes	Physical shops and petshops	No	No	Once a week	Yes	Kept in the aquarium, You've given it to another aquarist	No	I make a donation, Trade with other hobbyists for other fish or aquarium equipment	No	aquarism forums, Internet searches (google, blogs), Trial and error, Book consultation and specific literature, Consult specialized websites	Fewer fish will be available for trade in the future due to excessive catch and loss of natural habitats	On the Internet
291	2019-02-12 15:46:56	Hobbysta (ornamental fish breeder only)	Less than 1 year ago	Beauty of animals and aquariums	Freshwater	Aesthetics of the animal	Raised in captivity	Less than 100 R$	Between 10 and 20 fish	6	No	Physical shops and petshops	No	No	Once a week	No	No	No	I make a donation	No	aquarism forums, Internet searches (google, blogs)	More fish will be available for trade in the future due to cultivation	With specialized professionals, On the Internet
292	2019-02-12 15:47:39	Hobbysta (ornamental fish breeder only)	More than 10 years ago	Beauty of animals and aquariums	Marine	Aesthetics of the animal, Origin of the animal, Animal behavior	Raised in captivity	Between 100 and 500 R$	Between 5 and 10 fish	7	Yes	Physical shops and petshops, Aquarism groups on Facebook	No	No	Once a week	No	No	Yes	Sell, Trade with other hobbyists for other fish or aquarium equipment	No	aquarism forums, Trial and error	Fewer fish will be available for trade in the future due to excessive catch and loss of natural habitats	With fellow aquarists
293	2019-02-12 15:51:49	Hobbysta (ornamental fish breeder only)	Between 1 and 5 years	Beauty of animals and aquariums	Freshwater	Animal price, Aesthetics of the animal, Origin of the animal, Behavior of the animal, If the animal provides any function inside the aquarium	Raised in captivity	Less than 100 R$	Between 20 and 50 fish	7	No	Physical shops and petshops	No	No	Once a week	No	No	Yes	I make a donation	No	aquarism forums, Internet searches (google, blogs)	More fish will be available for trade in the future due to cultivation	On the Internet, With fellow aquarists
294	2019-02-12 15:54:37	Hobbysta (ornamental fish breeder only)	Less than 1 year ago	Beauty of animals and aquariums	Freshwater	Animal behavior	Raised in captivity	Less than 100 R$	Between 10 and 20 fish	4	No	Physical shops and petshops	No	No	Once every 15 days	No	Kept in the aquarium	Yes	Sell	No	Internet searches (google, blogs)	More fish will be available for trade in the future due to cultivation	On the Internet
295	2019-02-12 15:56:48	Hobbysta (ornamental fish breeder only)	Between 1 and 5 years	Beauty of animals and aquariums	Marine	Origin of the animal, Behavior of the animal, If the animal provides any function inside the aquarium	Wild caught in nature	Between 100 and 500 R$	Between 5 and 10 fish	6	Yes	Online stores (free market, olx, aquarium store websites), Aquarism groups on Facebook	Yes	No	Once every 15 days	No	Sold	No	Sell, I make a donation, Trade with other hobbyists for other fish or aquarium equipment	No	aquarism forums, Courses, Internet searches (google, blogs)	Fewer fish will be available for trade in the future due to excessive catch and loss of natural habitats	With specialized professionals, On the Internet, With fellow aquarists
296	2019-02-12 15:59:06	Hobbysta (ornamental fish breeder only)	Less than 1 year ago	Beauty of animals and aquariums	Freshwater	Animal price, Aesthetics of the animal, Behavior of the animal, If the animal provides any function inside the aquarium	Raised in captivity	Less than 100 R$	Between 10 and 20 fish	3	No	Physical shops and petshops, Aquarism groups on Facebook	No	No	Once a week	Yes	Kept in the aquarium	No	I make a donation, Trade with other hobbyists for other fish or aquarium equipment	No	aquarism forums, Internet searches (google, blogs), Trial and error, Book consultation and specific literature, Consult specialized websites	More fish will be available for trade in the future due to cultivation	On the Internet, With fellow aquarists
297	2019-02-12 16:02:41	Hobbysta (ornamental fish breeder only)	Since my childhood	Beauty of animals and aquariums, Encouragement, recommendation or inheritance of friends or family	Freshwater	Animal price, Aesthetics of the animal, Animal behavior	Raised in captivity	Less than 100 R$	Between 10 and 20 fish	7	No	Physical shops and petshops	No	No	Once a month	Yes	Kept in the aquarium	Yes	I make a donation	No	aquarism forums, Internet searches (google, blogs), Trial and error, Consult specialized websites	Fewer fish will be available for trade in the future due to excessive catch and loss of natural habitats	On the Internet
298	2019-02-12 16:04:39	Hobbysta (ornamental fish breeder only)	Between 5 and 10 years	Beauty of animals and aquariums	Freshwater	Animal behavior	Raised in captivity	Between 100 and 500 R$	Between 20 and 50 fish	9	Yes	Physical shops and petshops	No	No	Once every 15 days	Yes	Kept in the aquarium, You've given it to another aquarist, Swapped with another aquarist for another fish	Yes	Sell, I make a donation, Trade with other hobbyists for other fish or aquarium equipment	No	aquarism forums, Internet searches (google, blogs), Book consultation and specific literature, Consult specialized websites	Fewer fish will be available for trade in the future due to excessive catch and loss of natural habitats	On the Internet, With fellow aquarists
299	2019-02-12 16:06:11	Hobbysta and Seller	More than 10 years ago	Beauty of animals and aquariums	Freshwater	Aesthetics of the animal	Raised in captivity	Between 100 and 500 R$	Entre 100 e 500 peixes	3	No	Buy directly from suppliers	Yes	No	More than once a week	Yes	Sold	Yes	Sell	Yes	Book consultation and specific literature	More fish will be available for trade in the future due to cultivation	I treat myself
300	2019-02-12 16:06:42	Hobbysta (ornamental fish breeder only)	Between 1 and 5 years	Beauty of animals and aquariums	Freshwater	Aesthetics of the animal, Animal behavior	Raised in captivity	Less than 100 R$	Between 5 and 10 fish	8	No	Buy directly from suppliers	No	No	Once every 15 days	No	No	Yes	Trade with other hobbyists for other fish or aquarium equipment	No	Trial and error	More fish will be available for trade in the future due to cultivation	With fellow aquarists
301	2019-02-12 16:07:30	Hobbysta (ornamental fish breeder only)	Between 1 and 5 years	Beauty of animals and aquariums	Freshwater	Animal behavior	Raised in captivity	Less than 100 R$	Between 10 and 20 fish	3	No	Physical shops and petshops	Yes	No	Once a month	No	No	Yes	Sell, I make a donation	No	aquarism forums, Internet searches (google, blogs), Trial and error	More fish will be available for trade in the future due to cultivation	On the Internet, With fellow aquarists
302	2019-02-12 16:08:28	Hobbysta (ornamental fish breeder only)	More than 10 years ago	Beauty of animals and aquariums	Freshwater	Animal price, Aesthetics of the animal, Behavior of the animal, If the animal provides any function inside the aquarium	Raised in captivity	Less than 100 R$	Between 20 and 50 fish	7	No	Physical shops and petshops, Aquarism groups on Facebook	No	No	Once a week	Yes	Kept in the aquarium	Yes	I make a donation, Trade with other hobbyists for other fish or aquarium equipment	No	aquarism forums, Internet searches (google, blogs), External access, Trial and error, Consult specialized websites	More fish will be available for trade in the future due to cultivation	On the Internet, With fellow aquarists
303	2019-02-12 16:09:02	Hobbysta and Seller	More than 10 years ago	Encouragement, recommendation or inheritance of friends or family	Freshwater	Aesthetics of the animal, Origin of the animal, Behavior of the animal, If the animal provides any function inside the aquarium	Raised in captivity	Less than 100 R$	Less than 5 fish	2	Yes	Physical shops and petshops	Yes	No	More than once a week	Yes	Kept in the aquarium, Sold	Yes	I make a donation	No	aquarism forums, Courses, Internet searches (google, blogs), External access, Trial and error, Book consultation and specific literature, Consult specialized websites	Fewer fish will be available for trade in the future due to excessive catch and loss of natural habitats	I treat myself
304	2019-02-12 16:12:39	Hobbysta (ornamental fish breeder only)	More than 10 years ago	Beauty of animals and aquariums, Behavior - are easy animals to care for, do not make noise	Freshwater	Origin of the animal, Animal behavior	Raised in captivity	Less than 100 R$	Between 20 and 50 fish	15	No	Physical shops and petshops	No	No	Once a month	Yes	Kept in the aquarium	Yes	I never fell apart	No	aquarism forums, Internet searches (google, blogs), Trial and error, Book consultation and specific literature, Consult specialized websites	More fish will be available for trade in the future due to cultivation	With specialized professionals, On the Internet, With fellow aquarists
305	2019-02-12 16:14:04	Hobbysta (ornamental fish breeder only)	Less than 1 year ago	Behavior - are easy animals to care for, do not make noise	Freshwater	Animal behavior	Raised in captivity	Less than 100 R$	Between 20 and 50 fish	10	No	Physical shops and petshops	No	No	Once a week	Yes	Kept in the aquarium	No	Sell, I make a donation, Trade with other hobbyists for other fish or aquarium equipment	No	aquarism forums, Internet searches (google, blogs), Consult specialized websites	More fish will be available for trade in the future due to cultivation	On the Internet, With fellow aquarists
306	2019-02-12 16:14:58	Hobbysta (ornamental fish breeder only)	Between 1 and 5 years	Encouragement, recommendation or inheritance of friends or family	Freshwater	Animal price, Origin of the animal, Behavior of the animal, If the animal provides any function inside the aquarium	Raised in captivity	Less than 100 R$	Between 20 and 50 fish	9	No	Physical shops and petshops, Buy directly from suppliers	Yes	No	Once every 15 days	Yes	Kept in the aquarium	No	Sell, I make a donation, Trade with other hobbyists for other fish or aquarium equipment	No	Trial and error	Fewer fish will be available for trade in the future due to excessive catch and loss of natural habitats	With fellow aquarists
307	2019-02-12 16:15:29	Hobbysta (ornamental fish breeder only)	Since my childhood	Beauty of animals and aquariums	Freshwater	Animal price, Aesthetics of the animal, Behavior of the animal, If the animal provides any function inside the aquarium	Raised in captivity	Between 100 and 500 R$	Between 20 and 50 fish	18	Yes	Physical shops and petshops	No	No	More than once a week	Yes	died	Yes	I make a donation, Trade with other hobbyists for other fish or aquarium equipment	No	Trial and error, Book consultation and specific literature	Fewer fish will be available for trade in the future due to excessive catch and loss of natural habitats	With specialized professionals, On the Internet, With fellow aquarists
308	2019-02-12 16:16:45	Hobbysta (ornamental fish breeder only)	Since my childhood	Beauty of animals and aquariums	Freshwater	Animal behavior	Raised in captivity	Less than 100 R$	Less than 5 fish	2	No	Physical shops and petshops	No	No	Every 6 months	Yes	Kept in the aquarium	Yes	I make a donation	No	Book consultation and specific literature	More fish will be available for trade in the future due to cultivation	I don't seek treatment
309	2019-02-12 16:17:36	Hobbysta (ornamental fish breeder only)	More than 10 years ago	Beauty of animals and aquariums	Freshwater	Compatibility with my aquarium and my fauna	Raised in captivity	Less than 100 R$	Between 5 and 10 fish	3	No	Physical shops and petshops	Yes	No	Once a week	Yes	Kept in the aquarium	No	I make a donation	No	aquarism forums, Internet searches (google, blogs), Book consultation and specific literature, Consult specialized websites	Fewer fish will be available for trade in the future due to excessive catch and loss of natural habitats	On the Internet, With fellow aquarists
310	2019-02-12 16:18:48	Hobbysta (ornamental fish breeder only)	Between 1 and 5 years	Beauty of animals and aquariums	Freshwater	Animal price, Aesthetics of the animal, Origin of the animal, Animal behavior	Raised in captivity	Between 100 and 500 R$	Between 20 and 50 fish	15	Yes	Physical shops and petshops, Online stores (free market, olx, aquarium store websites), Buy directly from suppliers, Capture in nature (lakes, rivers, ocean)	No	Yes	More than once a week	Yes	Kept in the aquarium, Sold, You've given it to another aquarist	Yes	Sell, I make a donation, Trade with other hobbyists for other fish or aquarium equipment	No	aquarism forums, Internet searches (google, blogs), Trial and error, Book consultation and specific literature, Consult specialized websites	More fish will be available for trade in the future due to cultivation	With fellow aquarists
311	2019-02-12 16:20:31	Hobbysta (ornamental fish breeder only)	Less than 1 year ago	Beauty of animals and aquariums	Freshwater	Aesthetics of the animal, Animal behavior	Raised in captivity	Less than 100 R$	Between 5 and 10 fish	2	No	Physical shops and petshops	Yes	No	Once a week	No	No	No	I make a donation	No	aquarism forums, Internet searches (google, blogs)	More fish will be available for trade in the future due to cultivation
312	2019-02-12 16:21:44	Hobbysta (ornamental fish breeder only)	Less than 1 year ago	Beauty of animals and aquariums	Freshwater	Animal price, Aesthetics of the animal, Ease in caring for the animal	Raised in captivity	Less than 100 R$	Between 10 and 20 fish	3	No	Physical shops and petshops	No	No	Once a week	No	Kept in the aquarium	No	I make a donation	No	aquarism forums, Internet searches (google, blogs), Book consultation and specific literature, Consult specialized websites	Fewer fish will be available for trade in the future due to excessive catch and loss of natural habitats	With fellow aquarists
313	2019-02-12 16:23:35	Hobbysta (ornamental fish breeder only)	Between 1 and 5 years	Beauty of animals and aquariums	Freshwater	Behavior of the animal, If the animal provides any function inside the aquarium	Indifferent	I don't know	Between 10 and 20 fish	7	No	Buy directly from suppliers, Capture in nature (lakes, rivers, ocean)	Yes	Yes	Once every 15 days	No	Kept in the aquarium, Sold, Swapped with another aquarist for another fish	Yes	Trade with other hobbyists for other fish or aquarium equipment	No	Faculdade	More fish will be available for trade in the future due to cultivation	With fellow aquarists
314	2019-02-12 16:24:03	Hobbysta (ornamental fish breeder only)	Less than 1 year ago	Beauty of animals and aquariums, Encouragement, recommendation or inheritance of friends or family	Freshwater	Animal price, Animal behavior, Ease in caring for the animal	Raised in captivity	Less than 100 R$	Between 10 and 20 fish	6	No	Physical shops and petshops	No	No	Once every 15 days	Yes	Swapped with another aquarist for another fish	Yes	I make a donation, Trade with other hobbyists for other fish or aquarium equipment	No	aquarism forums, Internet searches (google, blogs), Trial and error, Consult specialized websites	More fish will be available for trade in the future due to cultivation	With specialized professionals, On the Internet
315	2019-02-12 16:24:18	Hobbysta (ornamental fish breeder only)	Between 1 and 5 years	Encouragement, recommendation or inheritance of friends or family	Freshwater	Aesthetics of the animal, Origin of the animal, Behavior of the animal, If the animal provides any function inside the aquarium	Raised in captivity	Less than 100 R$	Between 20 and 50 fish	3	No	Physical shops and petshops	Yes	No	Once a month	Yes	Kept in the aquarium, You've given it to another aquarist	Yes	I make a donation	No	aquarism forums, Trial and error, Consult specialized websites	More fish will be available for trade in the future due to cultivation	With specialized professionals, On the Internet, With fellow aquarists
316	2019-02-12 16:25:08	Hobbysta (ornamental fish breeder only)	Between 1 and 5 years	Beauty of animals and aquariums	Freshwater	If the animal provides any function inside the aquarium	Raised in captivity	Between 100 and 500 R$	Between 20 and 50 fish	8	Yes	Physical shops and petshops, Aquarism groups on Facebook	Yes	No	More than once a week	Yes	Kept in the aquarium, Swapped with another aquarist for another fish	No	Trade with other hobbyists for other fish or aquarium equipment	No	aquarism forums, Internet searches (google, blogs), Book consultation and specific literature, Consult specialized websites	More fish will be available for trade in the future due to cultivation	With fellow aquarists
317	2019-02-12 16:25:17	Hobbysta (ornamental fish breeder only)	Since my childhood	Beauty of animals and aquariums	The two options	Animal price, Aesthetics of the animal, Origin of the animal, Animal behavior	Raised in captivity	Between 100 and 500 R$	Between 20 and 50 fish	12	Yes	Physical shops and petshops, Aquarism groups on Facebook, Grupos de WhatsApp	No	Yes	Once every 15 days	Yes	Kept in the aquarium, Sold, You've given it to another aquarist, Swapped with another aquarist for another fish	Yes	Sell, I make a donation, Trade with other hobbyists for other fish or aquarium equipment	No	aquarism forums, Internet searches (google, blogs), Trial and error, Book consultation and specific literature, Consult specialized websites	More fish will be available for trade in the future due to cultivation	On the Internet, With fellow aquarists
318	2019-02-12 16:28:01	Hobbysta (ornamental fish breeder only)	Between 1 and 5 years	Beauty of animals and aquariums	Freshwater	Aesthetics of the animal	Raised in captivity	Between 500 and 1,000 R$	Between 20 and 50 fish	4	No	Online stores (free market, olx, aquarium store websites), Buy directly from suppliers	Yes	No	More than once a week	No	Kept in the aquarium	Yes	I make a donation, Trade with other hobbyists for other fish or aquarium equipment	No	aquarism forums, Internet searches (google, blogs), Consult specialized websites	More fish will be available for trade in the future due to cultivation	With specialized professionals
319	2019-02-12 16:28:41	Hobbysta (ornamental fish breeder only)	Between 1 and 5 years	Beauty of animals and aquariums	Freshwater	Animal price, Aesthetics of the animal, Behavior of the animal, If the animal provides any function inside the aquarium	Raised in captivity	Less than 100 R$	Between 5 and 10 fish	4	No	Physical shops and petshops	No	No	Once every 15 days	Yes	Kept in the aquarium	Yes	I never fell apart	No	aquarism forums, Internet searches (google, blogs), Trial and error, Consult specialized websites	More fish will be available for trade in the future due to cultivation	With specialized professionals, On the Internet, With fellow aquarists
320	2019-02-12 16:29:32	Hobbysta (ornamental fish breeder only)	More than 10 years ago	Beauty of animals and aquariums	The two options	Behavior of the animal, If the animal provides any function inside the aquarium	Wild caught in nature	Between 100 and 500 R$	Between 5 and 10 fish	6	Yes	Physical shops and petshops, Aquarism groups on Facebook	No	No	Once every 15 days	Yes	Sold	Yes	Sell, I make a donation, Trade with other hobbyists for other fish or aquarium equipment	No	aquarism forums, Internet searches (google, blogs), Consult specialized websites	More fish will be available for trade in the future due to cultivation	On the Internet, With fellow aquarists
321	2019-02-12 16:30:14	Hobbysta (ornamental fish breeder only)	Between 1 and 5 years	Beauty of animals and aquariums	Freshwater	If the animal provides any function inside the aquarium	Raised in captivity	Less than 100 R$	Less than 5 fish	1	Yes	Physical shops and petshops	Yes	No	Once a week	No	No	Yes	I never fell apart	No	aquarism forums, Internet searches (google, blogs), Trial and error, Consult specialized websites	More fish will be available for trade in the future due to cultivation	On the Internet, With fellow aquarists
322	2019-02-12 16:30:42	Hobbysta (ornamental fish breeder only)	Between 1 and 5 years	Beauty of animals and aquariums, Encouragement, recommendation or inheritance of friends or family	Freshwater	Aesthetics of the animal, Origin of the animal, Animal behavior	Raised in captivity	Between 100 and 500 R$	Between 20 and 50 fish	9	No	Physical shops and petshops, Aquarism groups on Facebook	No	No	Once a week	Yes	Kept in the aquarium, Swapped with another aquarist for another fish	Yes	Sell, I make a donation, Trade with other hobbyists for other fish or aquarium equipment	No	aquarism forums, Internet searches (google, blogs), Trial and error	More fish will be available for trade in the future due to cultivation	With specialized professionals, On the Internet, With fellow aquarists
323	2019-02-12 16:31:14	Hobbysta (ornamental fish breeder only)	More than 10 years ago	Beauty of animals and aquariums	Freshwater	Animal behavior, Compatibility with my aquarium and my fauna	Raised in captivity	Less than 100 R$	Between 20 and 50 fish	8	No	Buy directly from suppliers	No	No	Once a week	Yes	Kept in the aquarium	No	Trade with other hobbyists for other fish or aquarium equipment	No	Internet searches (google, blogs), Trial and error	More fish will be available for trade in the future due to cultivation
324	2019-02-12 16:31:37	Hobbysta and Seller	Between 1 and 5 years	Beauty of animals and aquariums, Passion for fish and aquariums	Freshwater	Shop/seller recommendation, Aesthetics of the animal, Origin of the animal	Raised in captivity	Between 500 and 1,000 R$	Between 20 and 50 fish	1	Yes	Physical shops and petshops, Buy directly from suppliers	Yes	No	More than once a week	Yes	Kept in the aquarium, You've given it to another aquarist	No	I make a donation, Trade with other hobbyists for other fish or aquarium equipment	No	aquarism forums, Internet searches (google, blogs), Trial and error	More fish will be available for trade in the future due to cultivation	On the Internet, With fellow aquarists
325	2019-02-12 16:32:43	Hobbysta (ornamental fish breeder only)	Between 1 and 5 years	Beauty of animals and aquariums	Freshwater	Animal behavior	Raised in captivity	Less than 100 R$	Between 20 and 50 fish	8	No	Physical shops and petshops	No	No	Once a week	No	No	Yes	I never fell apart	No	Internet searches (google, blogs), Pesquisei por 1 ano sobre aquarismo, sendo assim montei meu aquario comunitário em paz e com consciência	Fewer fish will be available for trade in the future due to excessive catch and loss of natural habitats	With fellow aquarists, With fellow aquarists
326	2019-02-12 16:32:44	Hobbysta (ornamental fish breeder only)	Between 1 and 5 years	Beauty of animals and aquariums	Freshwater	Animal price	Raised in captivity	Between 100 and 500 R$	Between 20 and 50 fish	5	No	Physical shops and petshops	Yes	No	Once a week	Yes	Kept in the aquarium	Yes	Trade with other hobbyists for other fish or aquarium equipment	No	Internet searches (google, blogs), Trial and error	More fish will be available for trade in the future due to cultivation	On the Internet, With fellow aquarists
327	2019-02-12 16:32:44	Hobbysta (ornamental fish breeder only)	Between 1 and 5 years	Beauty of animals and aquariums	Freshwater	Aesthetics of the animal	Raised in captivity	Between 100 and 500 R$	Less than 5 fish	1	No	Physical shops and petshops, Online stores (free market, olx, aquarium store websites)	No	No	Once every 15 days	Yes	died	Yes	I make a donation	No	aquarism forums, Internet searches (google, blogs), Trial and error, Consult specialized websites	Fewer fish will be available for trade in the future due to excessive catch and loss of natural habitats	With specialized professionals, On the Internet, With fellow aquarists
328	2019-02-12 16:34:21	Hobbysta (ornamental fish breeder only)	Between 1 and 5 years	Beauty of animals and aquariums	Freshwater	Animal price, Aesthetics of the animal, Behavior of the animal, If the animal provides any function inside the aquarium	Raised in captivity	Less than 100 R$	Between 10 and 20 fish	4	Yes	Physical shops and petshops, Aquarism groups on Facebook	No	No	Once a week	Yes	You've given it to another aquarist	Yes	I make a donation	No	aquarism forums, Internet searches (google, blogs), Trial and error, Consult specialized websites	More fish will be available for trade in the future due to cultivation	On the Internet, With fellow aquarists
329	2019-02-12 16:36:40	Hobbysta (ornamental fish breeder only)	Between 1 and 5 years	Therapy/depression/anxiety/calm	Marine	Animal behavior	Indifferent	Between 100 and 500 R$	Between 5 and 10 fish	7	Yes	Physical shops and petshops	Yes	No	Once a week	No	No	No	I never fell apart	No	aquarism forums, Consult specialized websites	More fish will be available for trade in the future due to cultivation	Never happened
330	2019-02-12 16:36:47	Hobbysta (ornamental fish breeder only)	Less than 1 year ago	Passion for fish and aquariums	Freshwater	Animal behavior	Raised in captivity	Less than 100 R$	Between 10 and 20 fish	5	No	Physical shops and petshops	Yes	No	Once a week	No	No	No	I make a donation	No	aquarism forums, Internet searches (google, blogs), External access, Trial and error, Consult specialized websites	Fewer fish will be available for trade in the future due to excessive catch and loss of natural habitats	On the Internet, With fellow aquarists
331	2019-02-12 16:38:20	Hobbysta (ornamental fish breeder only)	Between 1 and 5 years	Beauty of animals and aquariums, Therapy/depression/anxiety/calm	Marine	Animal price, Origin of the animal, Animal behavior, Ease in caring for the animal	Raised in captivity	Between 100 and 500 R$	Less than 5 fish	2	Yes	Physical shops and petshops	No	No	More than once a week	No	Kept in the aquarium, Sold	Yes	Sell, I make a donation, Trade with other hobbyists for other fish or aquarium equipment	No	Internet searches (google, blogs), Book consultation and specific literature, Consult specialized websites	More fish will be available for trade in the future due to cultivation	On the Internet, With fellow aquarists
332	2019-02-12 16:39:50	Hobbysta (ornamental fish breeder only)	Between 1 and 5 years	Beauty of animals and aquariums, Encouragement, recommendation or inheritance of friends or family	Freshwater	Animal price, Aesthetics of the animal, Behavior of the animal, If the animal provides any function inside the aquarium	Raised in captivity	Less than 100 R$	Between 20 and 50 fish	3	No	Physical shops and petshops, Capture in nature (lakes, rivers, ocean)	No	No	Once a month	Yes	Kept in the aquarium	No	I make a donation, Trade with other hobbyists for other fish or aquarium equipment	Yes	aquarism forums, Internet searches (google, blogs), Trial and error	More fish will be available for trade in the future due to cultivation	On the Internet, With fellow aquarists
333	2019-02-12 16:40:13	Hobbysta (ornamental fish breeder only)	More than 10 years ago	Therapy/depression/anxiety/calm	Freshwater	Aesthetics of the animal, Compatibility with my aquarium and my fauna	Raised in captivity	Less than 100 R$	Between 5 and 10 fish	1	No	Physical shops and petshops, Buy directly from suppliers	No	No	Once every 15 days	No	No	Yes	I never fell apart	No	aquarism forums, Internet searches (google, blogs), Trial and error, Book consultation and specific literature, Consult specialized websites	More fish will be available for trade in the future due to cultivation	With fellow aquarists, I treat myself
334	2019-02-12 16:40:40	Hobbysta (ornamental fish breeder only)	More than 10 years ago	Beauty of animals and aquariums	Freshwater	Aesthetics of the animal, Origin of the animal, Animal behavior	Raised in captivity	Between 100 and 500 R$	Between 20 and 50 fish	3	Yes	Physical shops and petshops, Online stores (free market, olx, aquarium store websites), Aquarism groups on Facebook, Buy directly from suppliers	No	No	Once a week	Yes	Kept in the aquarium, Sold, You've given it to another aquarist, Swapped with another aquarist for another fish	Yes	Sell, I make a donation, Trade with other hobbyists for other fish or aquarium equipment	No	aquarism forums, Courses, Internet searches (google, blogs), Trial and error, Book consultation and specific literature, Consult specialized websites, Amigos aquaristas.	Fewer fish will be available for trade in the future due to excessive catch and loss of natural habitats	With specialized professionals, On the Internet, With fellow aquarists
335	2019-02-12 16:41:30	Hobbysta (ornamental fish breeder only)	Since my childhood	Beauty of animals and aquariums	Freshwater	Ease in caring for the animal	Raised in captivity	Less than 100 R$	Less than 5 fish	2	Yes	Physical shops and petshops	No	No	Once a week	Yes	Kept in the aquarium	Yes	I make a donation	No	Book consultation and specific literature	Fewer fish will be available for trade in the future due to excessive catch and loss of natural habitats	With fellow aquarists
336	2019-02-12 16:41:46	Hobbysta (ornamental fish breeder only)	Less than 1 year ago	Beauty of animals and aquariums	Freshwater	Aesthetics of the animal, Origin of the animal, Animal behavior, Ease in caring for the animal	Raised in captivity	Between 100 and 500 R$	Less than 5 fish	3	No	Physical shops and petshops	Yes	No	Once a month	No	You've given it to another aquarist	No	I make a donation	No	aquarism forums, Internet searches (google, blogs), Consult specialized websites	More fish will be available for trade in the future due to cultivation	With specialized professionals, On the Internet, With fellow aquarists
337	2019-02-12 16:43:04	Hobbysta (ornamental fish breeder only)	Between 1 and 5 years	Commercial interest - in addition to creating, you sell ornamental fish	Freshwater	Aesthetics of the animal	Raised in captivity	Less than 100 R$	Between 5 and 10 fish	3	No	Physical shops and petshops	No	No	Once every 15 days	Yes	Swapped with another aquarist for another fish	No	Trade with other hobbyists for other fish or aquarium equipment	No	Internet searches (google, blogs), Book consultation and specific literature	More fish will be available for trade in the future due to cultivation	On the Internet
338	2019-02-12 16:43:35	Hobbysta (ornamental fish breeder only)	Between 1 and 5 years	Beauty of animals and aquariums	Freshwater	Aesthetics of the animal, Animal behavior	Raised in captivity	Less than 100 R$	Between 20 and 50 fish	4	No	Physical shops and petshops, Online stores (free market, olx, aquarium store websites)	No	No	More than once a week	No	No	Yes	Sell, I make a donation, Trade with other hobbyists for other fish or aquarium equipment	No	aquarism forums, Internet searches (google, blogs), Trial and error, Consult specialized websites	Fewer fish will be available for trade in the future due to excessive catch and loss of natural habitats	With specialized professionals, On the Internet, With fellow aquarists
339	2019-02-12 16:43:51	Hobbysta (ornamental fish breeder only)	Less than 1 year ago	Passion for fish and aquariums	Freshwater	Ease in caring for the animal	Raised in captivity	Less than 100 R$	Less than 5 fish	1	No	Physical shops and petshops	Yes	No	Once a week	No	No	No	I make a donation	No	Internet searches (google, blogs)	Fewer fish will be available for trade in the future due to excessive catch and loss of natural habitats	With specialized professionals
340	2019-02-12 16:46:26	Hobbysta and Seller	Since my childhood	Beauty of animals and aquariums	Freshwater	Aesthetics of the animal	Raised in captivity	Less than 100 R$	Between 20 and 50 fish	10	Yes	Online stores (free market, olx, aquarium store websites)	Yes	No	Once every 15 days	Yes	Sold, Swapped with another aquarist for another fish	Yes	Sell	No	aquarism forums, Book consultation and specific literature, Consult specialized websites	More fish will be available for trade in the future due to cultivation	On the Internet
341	2019-02-12 16:46:44	Hobbysta (ornamental fish breeder only)	Less than 1 year ago	Beauty of animals and aquariums	Freshwater	Animal price	Raised in captivity	Between 100 and 500 R$	Less than 5 fish	1	No	Physical shops and petshops	No	No	Once a week	No	No	No	I make a donation	No	aquarism forums, Internet searches (google, blogs), Consult specialized websites	More fish will be available for trade in the future due to cultivation	With specialized professionals, On the Internet
342	2019-02-12 16:49:22	Hobbysta (ornamental fish breeder only)	Less than 1 year ago	Therapy/depression/anxiety/calm	Freshwater	Animal behavior	Raised in captivity	Between 100 and 500 R$	Between 5 and 10 fish	4	No	Physical shops and petshops	No	No	More than once a week	Yes	Kept in the aquarium	No	I make a donation, Devolvo à loja	No	aquarism forums, Internet searches (google, blogs), Trial and error	More fish will be available for trade in the future due to cultivation	On the Internet
343	2019-02-12 16:49:57	Hobbysta (ornamental fish breeder only)	Between 5 and 10 years	Beauty of animals and aquariums	Freshwater	Aesthetics of the animal	Raised in captivity	Less than 100 R$	Between 20 and 50 fish	4	No	Buy directly from suppliers	No	No	Once a month	Yes	Kept in the aquarium, You've given it to another aquarist	Yes	I make a donation	No	aquarism forums, Internet searches (google, blogs), Trial and error	Fewer fish will be available for trade in the future due to excessive catch and loss of natural habitats	On the Internet, With fellow aquarists
344	2019-02-12 16:50:33	Hobbysta (ornamental fish breeder only)	Between 1 and 5 years	Beauty of animals and aquariums, Encouragement, recommendation or inheritance of friends or family	Freshwater	Animal price, Origin of the animal, Behavior of the animal, If the animal provides any function inside the aquarium	Raised in captivity	Less than 100 R$	Between 20 and 50 fish	6	No	Physical shops and petshops	No	No	Once a month	Yes	Kept in the aquarium, You've given it to another aquarist	Yes	I make a donation, Trade with other hobbyists for other fish or aquarium equipment	No	aquarism forums, Internet searches (google, blogs), Trial and error	More fish will be available for trade in the future due to cultivation	On the Internet, With fellow aquarists
345	2019-02-12 16:50:38	Hobbysta (ornamental fish breeder only)	Between 1 and 5 years	Therapy/depression/anxiety/calm	Freshwater	Animal behavior	Raised in captivity	Between 100 and 500 R$	Between 20 and 50 fish	2	No	Buy directly from suppliers	No	No	Once every 15 days	Yes	Kept in the aquarium	Yes	I make a donation	No	aquarism forums, Internet searches (google, blogs), Trial and error	Fewer fish will be available for trade in the future due to excessive catch and loss of natural habitats	On the Internet, With fellow aquarists
346	2019-02-12 16:50:58	Hobbysta (ornamental fish breeder only)	Since my childhood	Commercial interest - in addition to creating, you sell ornamental fish, Beauty of animals and aquariums, Encouragement, recommendation or inheritance of friends or family	The two options	Animal price, Aesthetics of the animal, Animal behavior, Ease in caring for the animal	Raised in captivity	Between 500 and 1,000 R$	Between 20 and 50 fish	0	No	Physical shops and petshops, Aquarism groups on Facebook	No	No	Once a week	Yes	Kept in the aquarium, You've given it to another aquarist	Yes	I make a donation, Trade with other hobbyists for other fish or aquarium equipment	No	aquarism forums, Internet searches (google, blogs)	More fish will be available for trade in the future due to cultivation	On the Internet
347	2019-02-12 16:52:22	Hobbysta (ornamental fish breeder only)	Since my childhood	Beauty of animals and aquariums	Marine	Origin of the animal, If the animal provides any function inside the aquarium	Raised in captivity	Between 100 and 500 R$	Less than 5 fish	3	Yes	Aquarism groups on Facebook, Buy directly from suppliers	No	No	More than once a week	No	No	No	Trade with other hobbyists for other fish or aquarium equipment	No	aquarism forums, Auxilio de outros aquaristas e lojistas	Fewer fish will be available for trade in the future due to excessive catch and loss of natural habitats	Never happened
348	2019-02-12 16:53:29	Hobbysta (ornamental fish breeder only)	Between 1 and 5 years	Encouragement, recommendation or inheritance of friends or family	Freshwater	Aesthetics of the animal, Ease in caring for the animal	Raised in captivity	Less than 100 R$	Less than 5 fish	1	No	Physical shops and petshops	No	No	Once every 15 days	Yes	Kept in the aquarium	Yes	I never fell apart	No	aquarism forums, Internet searches (google, blogs), Trial and error, Consult specialized websites	Fewer fish will be available for trade in the future due to excessive catch and loss of natural habitats	On the Internet, With fellow aquarists
349	2019-02-12 16:54:33	Hobbysta (ornamental fish breeder only)	Between 1 and 5 years	Beauty of animals and aquariums	Marine	Ease in caring for the animal	Raised in captivity	Between 100 and 500 R$	Less than 5 fish	1	No	Physical shops and petshops	No	No	Once a week	Yes	Kept in the aquarium	Yes	Sell, I make a donation	No	aquarism forums, Internet searches (google, blogs), Trial and error, Book consultation and specific literature, Consult specialized websites	Fewer fish will be available for trade in the future due to excessive catch and loss of natural habitats	With specialized professionals, On the Internet, With fellow aquarists
350	2019-02-12 16:54:36	Hobbysta (ornamental fish breeder only)	Between 5 and 10 years	Beauty of animals and aquariums	Freshwater	Animal behavior	Raised in captivity	Less than 100 R$	Between 20 and 50 fish	8	No	Physical shops and petshops, Buy directly from suppliers	No	No	Once a month	Yes	Kept in the aquarium	Yes	Sell, I make a donation, Trade with other hobbyists for other fish or aquarium equipment	No	aquarism forums, Courses, Internet searches (google, blogs), Trial and error, Book consultation and specific literature, Consult specialized websites, Palestras	More fish will be available for trade in the future due to cultivation	With specialized professionals, On the Internet, With fellow aquarists
351	2019-02-12 16:57:14	Hobbysta (ornamental fish breeder only)	Between 5 and 10 years	Beauty of animals and aquariums	Freshwater	Animal price, Shop/seller recommendation, Aesthetics of the animal, Origin of the animal, Behavior of the animal, If the animal provides any function inside the aquarium, Ease in caring for the animal	Raised in captivity	Less than 100 R$	Between 10 and 20 fish	3	No	Physical shops and petshops	Yes	No	Once every 15 days	Yes	Kept in the aquarium	Yes	I never fell apart	No	aquarism forums, Internet searches (google, blogs)	More fish will be available for trade in the future due to cultivation	On the Internet, With fellow aquarists
352	2019-02-12 16:57:19	Hobbysta (ornamental fish breeder only)	Between 5 and 10 years	Commercial interest - in addition to creating, you sell ornamental fish, Beauty of animals and aquariums	Freshwater	Aesthetics of the animal, Behavior of the animal, If the animal provides any function inside the aquarium	Raised in captivity	Less than 100 R$	Between 10 and 20 fish	5	No	Physical shops and petshops, Online stores (free market, olx, aquarium store websites)	No	No	Once a week	Yes	Kept in the aquarium	Yes	Sell, I make a donation	No	aquarism forums, Internet searches (google, blogs), Book consultation and specific literature	More fish will be available for trade in the future due to cultivation	On the Internet, With fellow aquarists
353	2019-02-12 16:58:17	Hobbysta (ornamental fish breeder only)	More than 10 years ago	Beauty of animals and aquariums	Freshwater	Animal price, Aesthetics of the animal, Origin of the animal, Behavior of the animal, If the animal provides any function inside the aquarium	Raised in captivity	Less than 100 R$	Between 10 and 20 fish	7	No	Physical shops and petshops	No	No	Once a month	Yes	You've given it to another aquarist, Swapped with another aquarist for another fish	Yes	Trade with other hobbyists for other fish or aquarium equipment	No	aquarism forums, Internet searches (google, blogs), Trial and error, Consult specialized websites, Lojistas	Fewer fish will be available for trade in the future due to excessive catch and loss of natural habitats	On the Internet, With specialized professionals
354	2019-02-12 16:58:45	Hobbysta (ornamental fish breeder only)	Between 1 and 5 years	Beauty of animals and aquariums	Freshwater	Aesthetics of the animal	Raised in captivity	Less than 100 R$	Between 20 and 50 fish	13	Yes	Physical shops and petshops	No	No	Once a week	No	Kept in the aquarium	Yes	I never fell apart	No	aquarism forums, Internet searches (google, blogs), Trial and error	Fewer fish will be available for trade in the future due to excessive catch and loss of natural habitats	On the Internet, With fellow aquarists
355	2019-02-12 17:00:28	Hobbysta (ornamental fish breeder only)	More than 10 years ago	Beauty of animals and aquariums, Encouragement, recommendation or inheritance of friends or family	Freshwater	Animal price, Aesthetics of the animal, If the animal provides any function inside the aquarium, Ease in caring for the animal	Raised in captivity	Between 100 and 500 R$	Between 20 and 50 fish	6	Yes	Physical shops and petshops, Online stores (free market, olx, aquarium store websites)	No	No	Once a week	Yes	Kept in the aquarium	Yes	I make a donation, Trade with other hobbyists for other fish or aquarium equipment	No	aquarism forums, Internet searches (google, blogs), Trial and error, Consult specialized websites	Fewer fish will be available for trade in the future due to excessive catch and loss of natural habitats	On the Internet, With fellow aquarists
356	2019-02-12 17:01:18	Hobbysta (ornamental fish breeder only)	Since my childhood	Beauty of animals and aquariums	Freshwater	Animal behavior	Raised in captivity	Between 100 and 500 R$	Between 20 and 50 fish	14	No	Aquarism groups on Facebook, Buy directly from suppliers	No	No	Once a week	Yes	Kept in the aquarium, Sold	Yes	Sell, I make a donation, Trade with other hobbyists for other fish or aquarium equipment	No	aquarism forums, Internet searches (google, blogs), Trial and error, Book consultation and specific literature, Consult specialized websites	More fish will be available for trade in the future due to cultivation	With specialized professionals, On the Internet, With fellow aquarists
357	2019-02-12 17:01:41	Hobbysta (ornamental fish breeder only)	Since my childhood	Beauty of animals and aquariums	Freshwater	Aesthetics of the animal	Raised in captivity	Between 100 and 500 R$	Between 20 and 50 fish	2	Yes	Physical shops and petshops, Online stores (free market, olx, aquarium store websites)	Yes	No	Once a week	Yes	Kept in the aquarium, Sold	Yes	Sell, I make a donation	No	aquarism forums, Internet searches (google, blogs), Trial and error, Consult specialized websites	More fish will be available for trade in the future due to cultivation	With specialized professionals, On the Internet, With fellow aquarists
358	2019-02-12 17:02:33	Hobbysta (ornamental fish breeder only)	Atualmente não crio mais, por falta de espaço.	Beauty of animals and aquariums	Freshwater	Origin of the animal, Animal behavior	Raised in captivity	I don't spend anything	Nenhum	1	No	Physical shops and petshops	No	No	Once every 15 days	No	No	Yes	I make a donation	No	aquarism forums, Internet searches (google, blogs), Consult specialized websites	Fewer fish will be available for trade in the future due to excessive catch and loss of natural habitats	On the Internet, With fellow aquarists
359	2019-02-12 17:04:40	Hobbysta (ornamental fish breeder only)	Between 5 and 10 years	Beauty of animals and aquariums	Freshwater	Animal price, Shop/seller recommendation, Aesthetics of the animal, Origin of the animal, Animal behavior	Raised in captivity	Less than 100 R$	Between 5 and 10 fish	3	No	Physical shops and petshops	No	No	Once every 15 days	Yes	Kept in the aquarium, Sold, You've given it to another aquarist	Yes	Sell, I make a donation, Trade with other hobbyists for other fish or aquarium equipment	Yes	aquarism forums, Courses, Internet searches (google, blogs), Trial and error, Book consultation and specific literature, Consult specialized websites	More fish will be available for trade in the future due to cultivation	With fellow aquarists
360	2019-02-12 17:05:21	Hobbysta (ornamental fish breeder only)	Between 1 and 5 years	Beauty of animals and aquariums	Freshwater	Aesthetics of the animal, Origin of the animal, Behavior of the animal, If the animal provides any function inside the aquarium	Raised in captivity	Less than 100 R$	Between 20 and 50 fish	11	Yes	Physical shops and petshops	No	No	Once every 15 days	No	No	Yes	Release in nature, Dependendo do animal	Yes	aquarism forums, Internet searches (google, blogs), Trial and error, Consult specialized websites	More fish will be available for trade in the future due to cultivation	On the Internet, With fellow aquarists
361	2019-02-12 17:07:00	Hobbysta (ornamental fish breeder only)	Between 5 and 10 years	Commercial interest - in addition to creating, you sell ornamental fish	Freshwater	Animal behavior	Raised in captivity	Less than 100 R$	Less than 5 fish	1	No	Physical shops and petshops	No	No	Once every 15 days	Yes	Kept in the aquarium	Yes	I make a donation	No	aquarism forums, Internet searches (google, blogs), Trial and error, Consult specialized websites	Fewer fish will be available for trade in the future due to excessive catch and loss of natural habitats	With specialized professionals, On the Internet, With fellow aquarists
362	2019-02-12 17:07:00	Hobbysta (ornamental fish breeder only)	Less than 1 year ago	Beauty of animals and aquariums	Freshwater	Aesthetics of the animal, Animal behavior	Raised in captivity	Less than 100 R$	Between 10 and 20 fish	5	Yes	Physical shops and petshops	No	No	Once a week	Yes	Kept in the aquarium	Yes	Trade with other hobbyists for other fish or aquarium equipment	No	aquarism forums, Internet searches (google, blogs)	More fish will be available for trade in the future due to cultivation	With specialized professionals, With fellow aquarists
363	2019-02-12 17:07:48	Hobbysta (ornamental fish breeder only)	More than 10 years ago	Beauty of animals and aquariums	Freshwater	If the animal provides any function inside the aquarium	Raised in captivity	Less than 100 R$	Between 20 and 50 fish	7	Yes	Physical shops and petshops, Aquarism groups on Facebook	No	No	Once a week	Yes	Kept in the aquarium, Swapped with another aquarist for another fish	Yes	Trade with other hobbyists for other fish or aquarium equipment	No	aquarism forums, Courses, Internet searches (google, blogs), External access, Trial and error, Book consultation and specific literature, Consult specialized websites	More fish will be available for trade in the future due to cultivation	With specialized professionals
364	2019-02-12 17:09:26	Hobbysta (ornamental fish breeder only)	Since my childhood	Beauty of animals and aquariums, fish behavior	Freshwater	Aesthetics of the animal, Animal behavior	Raised in captivity	Between 100 and 500 R$	Between 10 and 20 fish	8	No	Physical shops and petshops, Online stores (free market, olx, aquarium store websites), Aquarism groups on Facebook	Yes	No	More than once a week	Yes	Kept in the aquarium	Yes	Sell, I make a donation, Trade with other hobbyists for other fish or aquarium equipment	No	aquarism forums, Internet searches (google, blogs), Book consultation and specific literature, Consult specialized websites, Meus pais.	More fish will be available for trade in the future due to cultivation	With specialized professionals, On the Internet, With fellow aquarists
365	2019-02-12 17:10:37	Hobbysta (ornamental fish breeder only)	Between 5 and 10 years	Beauty of animals and aquariums	Freshwater	Compatibility with my aquarium and my fauna	Raised in captivity	Less than 100 R$	Between 10 and 20 fish	3	No	Physical shops and petshops	No	No	Once a week	No	Kept in the aquarium	Yes	I make a donation	No	aquarism forums, Internet searches (google, blogs), Consult specialized websites	More fish will be available for trade in the future due to cultivation	On the Internet
366	2019-02-12 17:11:46	Hobbysta (ornamental fish breeder only)	Since my childhood	Beauty of animals and aquariums	Freshwater	Animal behavior	Raised in captivity	Less than 100 R$	Between 5 and 10 fish	4	No	Physical shops and petshops, Online stores (free market, olx, aquarium store websites), Aquarism groups on Facebook	Yes	No	Once every 15 days	No	No	No	I make a donation	No	Internet searches (google, blogs), Book consultation and specific literature, Consult specialized websites	More fish will be available for trade in the future due to cultivation	On the Internet, With fellow aquarists
367	2019-02-12 17:11:49	Hobbysta (ornamental fish breeder only)	Since my childhood	Beauty of animals and aquariums	Freshwater	Origin of the animal, Behavior of the animal, If the animal provides any function inside the aquarium	Raised in captivity	Less than 100 R$	Between 10 and 20 fish	6	No	Physical shops and petshops	No	No	Once every 15 days	No	No	No	I make a donation	No	aquarism forums, Internet searches (google, blogs), Trial and error, Book consultation and specific literature, Consult specialized websites	Fewer fish will be available for trade in the future due to excessive catch and loss of natural habitats	With specialized professionals, On the Internet, With fellow aquarists
368	2019-02-12 17:12:04	Hobbysta (ornamental fish breeder only)	Between 1 and 5 years	Beauty of animals and aquariums	Freshwater	Animal behavior	Raised in captivity	Between 100 and 500 R$	Between 20 and 50 fish	6	No	Physical shops and petshops, Aquarism groups on Facebook, Buy directly from suppliers	No	No	Once a month	Yes	Sold	Yes	Sell	No	Internet searches (google, blogs), Consult specialized websites	Fewer fish will be available for trade in the future due to excessive catch and loss of natural habitats	With specialized professionals, On the Internet
369	2019-02-12 17:12:23	Hobbysta (ornamental fish breeder only)	Less than 1 year ago	Beauty of animals and aquariums	Freshwater	Aesthetics of the animal, Animal behavior	Raised in captivity	Less than 100 R$	Between 10 and 20 fish	4	No	Physical shops and petshops	Yes	No	Once a week	No	Kept in the aquarium	No	I make a donation	No	aquarism forums, Internet searches (google, blogs), Trial and error, Consult specialized websites	More fish will be available for trade in the future due to cultivation	On the Internet
370	2019-02-12 17:12:55	Hobbysta (ornamental fish breeder only)	Between 1 and 5 years	Beauty of animals and aquariums	The two options	Aesthetics of the animal, Behavior of the animal, If the animal provides any function inside the aquarium	Raised in captivity	Less than 100 R$	Between 5 and 10 fish	3	No	Physical shops and petshops	No	No	Once a month	No	No	Yes	I make a donation	No	aquarism forums, Internet searches (google, blogs), Consult specialized websites	More fish will be available for trade in the future due to cultivation	On the Internet, With fellow aquarists
371	2019-02-12 17:13:14	Hobbysta (ornamental fish breeder only)	Less than 1 year ago	Beauty of animals and aquariums	Freshwater	Animal behavior	Raised in captivity	Less than 100 R$	Between 10 and 20 fish	8	Yes	Physical shops and petshops, Aquarism groups on Facebook	No	No	Once every 15 days	No	Kept in the aquarium, You've given it to another aquarist	Yes	I make a donation	No	aquarism forums, Internet searches (google, blogs), Consult specialized websites	Fewer fish will be available for trade in the future due to excessive catch and loss of natural habitats	With specialized professionals, With fellow aquarists
372	2019-02-12 17:16:15	Hobbysta (ornamental fish breeder only)	Between 1 and 5 years	Beauty of animals and aquariums	Freshwater	Aesthetics of the animal	Raised in captivity	Less than 100 R$	Between 20 and 50 fish	9	No	Physical shops and petshops	No	No	Once a week	No	Kept in the aquarium	No	Release in nature	Yes	Internet searches (google, blogs), Trial and error	Fewer fish will be available for trade in the future due to excessive catch and loss of natural habitats
373	2019-02-12 17:18:04	Hobbysta (ornamental fish breeder only)	Since my childhood	Beauty of animals and aquariums	Freshwater	Animal price, Aesthetics of the animal, Animal behavior	Raised in captivity	Less than 100 R$	Between 5 and 10 fish	1	No	Physical shops and petshops	No	No	Once a month	Yes	Kept in the aquarium	Yes	Trade with other hobbyists for other fish or aquarium equipment	No	aquarism forums, Internet searches (google, blogs)	Fewer fish will be available for trade in the future due to excessive catch and loss of natural habitats	With fellow aquarists
374	2019-02-12 17:18:18	Hobbysta (ornamental fish breeder only)	Between 1 and 5 years	Beauty of animals and aquariums	Freshwater	Behavior of the animal, If the animal provides any function inside the aquarium	Raised in captivity	Less than 100 R$	Between 5 and 10 fish	3	No	Physical shops and petshops	No	No	Once every 15 days	No	No	Yes	Sell, I make a donation	No	aquarism forums, Internet searches (google, blogs), Trial and error	Fewer fish will be available for trade in the future due to excessive catch and loss of natural habitats	With specialized professionals, On the Internet
375	2019-02-12 17:19:13	Hobbysta (ornamental fish breeder only)	Less than 1 year ago	Beauty of animals and aquariums	Freshwater	Aesthetics of the animal, Origin of the animal, Animal behavior, Ease in caring for the animal	Raised in captivity	Between 500 and 1,000 R$	Between 10 and 20 fish	4	No	Physical shops and petshops	No	No	Once every 15 days	No	No	Yes	I never fell apart	No	aquarism forums, Internet searches (google, blogs), lojistas	Fewer fish will be available for trade in the future due to excessive catch and loss of natural habitats	With specialized professionals, On the Internet, With fellow aquarists
376	2019-02-12 17:19:56	Hobbysta (ornamental fish breeder only)	Less than 1 year ago	Beauty of animals and aquariums	Freshwater	Compatibility with my aquarium and my fauna	Raised in captivity	Less than 100 R$	Between 5 and 10 fish	3	No	Physical shops and petshops	Yes	No	Once every 15 days	No	No	No	I make a donation	No	aquarism forums	Fewer fish will be available for trade in the future due to excessive catch and loss of natural habitats	With fellow aquarists
377	2019-02-12 17:22:50	Hobbysta (ornamental fish breeder only)	Less than 1 year ago	Beauty of animals and aquariums	Freshwater	Aesthetics of the animal, Behavior of the animal, If the animal provides any function inside the aquarium	Raised in captivity	Between 100 and 500 R$	Between 10 and 20 fish	5	Yes	Physical shops and petshops	No	No	Once every 15 days	No	No	Yes	I make a donation, Trade with other hobbyists for other fish or aquarium equipment	No	aquarism forums, Internet searches (google, blogs), Trial and error, Book consultation and specific literature, Consult specialized websites, Experiência do meu pai.	Fewer fish will be available for trade in the future due to excessive catch and loss of natural habitats	With specialized professionals
378	2019-02-12 17:24:59	Hobbysta (ornamental fish breeder only)	Between 1 and 5 years	Beauty of animals and aquariums	Freshwater	Aesthetics of the animal, Animal behavior	Raised in captivity	Less than 100 R$	Between 20 and 50 fish	4	No	Physical shops and petshops, Online stores (free market, olx, aquarium store websites), Aquarism groups on Facebook, Buy directly from suppliers	Yes	No	Once a week	Yes	died	Yes	Sell, I make a donation, Trade with other hobbyists for other fish or aquarium equipment	No	aquarism forums, Internet searches (google, blogs), Trial and error, Consult specialized websites, contato com amigos	More fish will be available for trade in the future due to cultivation	On the Internet, With fellow aquarists
379	2019-02-12 17:27:21	Hobbysta (ornamental fish breeder only)	Less than 1 year ago	Beauty of animals and aquariums	Freshwater	Aesthetics of the animal, Behavior of the animal, If the animal provides any function inside the aquarium	Raised in captivity	Less than 100 R$	Between 10 and 20 fish	2	No	Physical shops and petshops	No	No	Once a week	No	No	No	I make a donation	No	aquarism forums, Internet searches (google, blogs), Trial and error, Consult specialized websites	More fish will be available for trade in the future due to cultivation	With fellow aquarists
380	2019-02-12 17:27:30	Hobbysta (ornamental fish breeder only)	Between 5 and 10 years	Encouragement, recommendation or inheritance of friends or family	Freshwater	Compatibility with my aquarium and my fauna	Raised in captivity	Less than 100 R$	Between 10 and 20 fish	6	No	Physical shops and petshops, Grupos de WhatsApp	No	Yes	Once a week	Yes	You've given it to another aquarist	Yes	I make a donation	No	aquarism forums, Internet searches (google, blogs), Book consultation and specific literature	More fish will be available for trade in the future due to cultivation	With specialized professionals, With fellow aquarists
381	2019-02-12 17:28:28	Hobbysta (ornamental fish breeder only)	Less than 1 year ago	Beauty of animals and aquariums	Freshwater	Origin of the animal, Animal behavior	Raised in captivity	Between 500 and 1,000 R$	Between 5 and 10 fish	4	No	Physical shops and petshops	No	No	Once a week	Yes	Swapped with another aquarist for another fish	Yes	Trade with other hobbyists for other fish or aquarium equipment	No	aquarism forums, Internet searches (google, blogs)	More fish will be available for trade in the future due to cultivation	On the Internet
382	2019-02-12 17:29:51	Hobbysta (ornamental fish breeder only)	Between 1 and 5 years	Beauty of animals and aquariums	Freshwater	Aesthetics of the animal, Animal behavior	Raised in captivity	Less than 100 R$	Between 20 and 50 fish	5	No	Physical shops and petshops	No	No	Once every 15 days	Yes	Kept in the aquarium	Yes	I never fell apart	No	aquarism forums, Internet searches (google, blogs)	More fish will be available for trade in the future due to cultivation	On the Internet, With fellow aquarists
383	2019-02-12 17:30:32	Hobbysta (ornamental fish breeder only)	Less than 1 year ago	Beauty of animals and aquariums	Freshwater	Aesthetics of the animal	Raised in captivity	Less than 100 R$	Between 5 and 10 fish	2	No	Physical shops and petshops	No	No	Once a week	No	No	Yes	Trade with other hobbyists for other fish or aquarium equipment	No	Internet searches (google, blogs)	More fish will be available for trade in the future due to cultivation	With specialized professionals, On the Internet
384	2019-02-12 17:31:47	Hobbysta (ornamental fish breeder only)	Between 5 and 10 years	Beauty of animals and aquariums, Behavior - are easy animals to care for, do not make noise	Freshwater	Animal price, Aesthetics of the animal, Origin of the animal, Animal behavior, Ease in caring for the animal	Raised in captivity	Less than 100 R$	Between 10 and 20 fish	6	No	Physical shops and petshops	No	No	Once every 15 days	Yes	Kept in the aquarium	Yes	I make a donation	No	aquarism forums, Internet searches (google, blogs), Trial and error	Fewer fish will be available for trade in the future due to excessive catch and loss of natural habitats	On the Internet, With fellow aquarists
385	2019-02-12 17:32:08	Hobbysta (ornamental fish breeder only)	More than 10 years ago	Beauty of animals and aquariums	Freshwater	Aesthetics of the animal, Origin of the animal, Animal behavior	Raised in captivity	Between 100 and 500 R$	Between 10 and 20 fish	2	No	Physical shops and petshops	No	No	Once every 15 days	Yes	Kept in the aquarium, You've given it to another aquarist	Yes	I make a donation	No	aquarism forums, Internet searches (google, blogs), Book consultation and specific literature, Consult specialized websites	More fish will be available for trade in the future due to cultivation	With specialized professionals
386	2019-02-12 17:33:22	Hobbysta (ornamental fish breeder only)	Between 1 and 5 years	Beauty of animals and aquariums	The two options	Animal price, Aesthetics of the animal, Origin of the animal, Behavior of the animal, If the animal provides any function inside the aquarium	Raised in captivity	Less than 100 R$	Between 20 and 50 fish	11	Yes	Physical shops and petshops, Buy directly from suppliers	No	No	Once every 15 days	No	No	Yes	I make a donation	No	aquarism forums, Internet searches (google, blogs), External access, Trial and error, Consult specialized websites	More fish will be available for trade in the future due to cultivation	On the Internet, With fellow aquarists
387	2019-02-12 17:34:21	Hobbysta (ornamental fish breeder only)	Between 5 and 10 years	Beauty of animals and aquariums	Freshwater	If the animal provides any function inside the aquarium	Wild caught in nature	Less than 100 R$	Between 10 and 20 fish	5	No	Physical shops and petshops	Yes	No	Once a week	Yes	Kept in the aquarium	Yes	Sell, I make a donation, Trade with other hobbyists for other fish or aquarium equipment	No	aquarism forums, Internet searches (google, blogs), External access, Trial and error, Consult specialized websites	Fewer fish will be available for trade in the future due to excessive catch and loss of natural habitats	On the Internet, With fellow aquarists
388	2019-02-12 17:35:08	Hobbysta (ornamental fish breeder only)	Less than 1 year ago	Behavior - are easy animals to care for, do not make noise	Freshwater	Animal behavior	Raised in captivity	Between 100 and 500 R$	Between 20 and 50 fish	13	Yes	Physical shops and petshops	No	No	Once every 15 days	Yes	Kept in the aquarium	Yes	Trade with other hobbyists for other fish or aquarium equipment	No	aquarism forums, Internet searches (google, blogs), Consult specialized websites	More fish will be available for trade in the future due to cultivation	With specialized professionals, On the Internet, With fellow aquarists
389	2019-02-12 17:36:29	Hobbysta (ornamental fish breeder only)	Since my childhood	Behavior - are easy animals to care for, do not make noise	Freshwater	Ease in caring for the animal	Raised in captivity	Less than 100 R$	Between 5 and 10 fish	2	No	Physical shops and petshops	No	No	Once every 15 days	Yes	Kept in the aquarium	Yes	I make a donation	No	aquarism forums, Internet searches (google, blogs)	More fish will be available for trade in the future due to cultivation	On the Internet
390	2019-02-12 17:38:53	Hobbysta (ornamental fish breeder only)	More than 10 years ago	Beauty of animals and aquariums	The two options	Animal price, Shop/seller recommendation, Aesthetics of the animal, Origin of the animal, Behavior of the animal, If the animal provides any function inside the aquarium	Raised in captivity	Between 100 and 500 R$	Between 5 and 10 fish	5	Yes	Online stores (free market, olx, aquarium store websites)	No	No	More than once a week	Yes	Kept in the aquarium, You've given it to another aquarist	Yes	I make a donation, Trade with other hobbyists for other fish or aquarium equipment	No	aquarism forums	More fish will be available for trade in the future due to cultivation	On the Internet, With fellow aquarists
391	2019-02-12 17:40:56	Hobbysta and Seller	More than 10 years ago	Beauty of animals and aquariums	Freshwater	Aesthetics of the animal, Origin of the animal, Behavior of the animal, If the animal provides any function inside the aquarium	Raised in captivity	Between 100 and 500 R$	Between 20 and 50 fish	9	No	Physical shops and petshops, Online stores (free market, olx, aquarium store websites), Buy directly from suppliers	No	No	More than once a week	Yes	Sold	Yes	Sell, I make a donation, Trade with other hobbyists for other fish or aquarium equipment	No	aquarism forums, Internet searches (google, blogs), External access, Trial and error, Book consultation and specific literature, Consult specialized websites	More fish will be available for trade in the future due to cultivation	On the Internet, With fellow aquarists
392	2019-02-12 17:41:44	Hobbysta (ornamental fish breeder only)	Since my childhood	Beauty of animals and aquariums	Freshwater	Shop/seller recommendation, Origin of the animal, Animal behavior	Raised in captivity	Between 100 and 500 R$	Entre 50 e 100 peixes	22	Yes	Physical shops and petshops	No	No	Once every 15 days	Yes	Kept in the aquarium, You've given it to another aquarist	Yes	I make a donation	No	aquarism forums, Courses, Faculdade	More fish will be available for trade in the future due to cultivation	With specialized professionals, On the Internet, With fellow aquarists
393	2019-02-12 17:41:53	Hobbysta (ornamental fish breeder only)	Between 1 and 5 years	Beauty of animals and aquariums, Behavior - are easy animals to care for, do not make noise	Freshwater	Animal price, Behavior of the animal, If the animal provides any function inside the aquarium, Ease in caring for the animal	Raised in captivity	Less than 100 R$	Between 5 and 10 fish	3	No	Physical shops and petshops	No	No	Once a month	No	No	Yes	Sell, I make a donation	No	aquarism forums, Internet searches (google, blogs), Trial and error, Consult specialized websites	More fish will be available for trade in the future due to cultivation	With specialized professionals, On the Internet
394	2019-02-12 17:42:12	Hobbysta (ornamental fish breeder only)	More than 10 years ago	Beauty of animals and aquariums	Freshwater	Behavior of the animal, If the animal provides any function inside the aquarium, Ease in caring for the animal	Raised in captivity	Between 100 and 500 R$	Between 20 and 50 fish	8	No	Buy directly from suppliers	Yes	No	Once a week	No	No	Yes	I never fell apart	No	aquarism forums, Internet searches (google, blogs), Trial and error, Consult specialized websites	Fewer fish will be available for trade in the future due to excessive catch and loss of natural habitats	On the Internet
395	2019-02-12 17:43:19	Hobbysta (ornamental fish breeder only)	Since my childhood	Beauty of animals and aquariums	Freshwater	Aesthetics of the animal, Origin of the animal, Behavior of the animal, If the animal provides any function inside the aquarium	Raised in captivity	Between 100 and 500 R$	Between 20 and 50 fish	5	Yes	Physical shops and petshops	Yes	No	Once a month	No	Kept in the aquarium	No	I make a donation	No	Trial and error	Fewer fish will be available for trade in the future due to excessive catch and loss of natural habitats	With fellow aquarists
396	2019-02-12 17:43:25	Hobbysta (ornamental fish breeder only)	Since my childhood	Beauty of animals and aquariums	Freshwater	Animal price, Shop/seller recommendation, Origin of the animal	Raised in captivity	Less than 100 R$	Between 20 and 50 fish	6	Yes	Physical shops and petshops, Online stores (free market, olx, aquarium store websites), Aquarism groups on Facebook, Buy directly from suppliers	No	No	Once every 15 days	Yes	Kept in the aquarium	Yes	Sell, I make a donation, Trade with other hobbyists for other fish or aquarium equipment	No	aquarism forums, Trial and error, Book consultation and specific literature, Consult specialized websites	More fish will be available for trade in the future due to cultivation	With fellow aquarists
397	2019-02-12 17:43:25	Hobbysta (ornamental fish breeder only)	Between 1 and 5 years	Beauty of animals and aquariums	Freshwater	Aesthetics of the animal	Raised in captivity	Between 100 and 500 R$	more than a thousand	30	No	Physical shops and petshops	No	No	Once a week	Yes	Kept in the aquarium	No	Sell, I make a donation, Trade with other hobbyists for other fish or aquarium equipment	No	Courses, Internet searches (google, blogs), Consult specialized websites	Fewer fish will be available for trade in the future due to excessive catch and loss of natural habitats
398	2019-02-12 17:43:30	Hobbysta and Seller	More than 10 years ago	Commercial interest - in addition to creating, you sell ornamental fish	Freshwater	Shop/seller recommendation, Aesthetics of the animal	Raised in captivity	Between 500 and 1,000 R$	Between 500 and 1000 fish	11	No	Physical shops and petshops, Aquarism groups on Facebook	Yes	No	Once every 15 days	Yes	Sold, Swapped with another aquarist for another fish	No	I make a donation	No	Trial and error, Consult specialized websites	Fewer fish will be available for trade in the future due to excessive catch and loss of natural habitats	With fellow aquarists
399	2019-02-12 17:43:50	Hobbysta (ornamental fish breeder only)	More than 10 years ago	Beauty of animals and aquariums	Freshwater	Aesthetics of the animal, Animal behavior	Raised in captivity	Less than 100 R$	Between 10 and 20 fish	4	Yes	Physical shops and petshops	No	No	Once every 15 days	Yes	Kept in the aquarium, You've given it to another aquarist	Yes	I make a donation	No	aquarism forums, Internet searches (google, blogs), Trial and error	More fish will be available for trade in the future due to cultivation	On the Internet, With fellow aquarists
400	2019-02-12 17:44:30	Hobbysta (ornamental fish breeder only)	Since my childhood	Beauty of animals and aquariums	Freshwater	Shop/seller recommendation, Aesthetics of the animal, Origin of the animal, Behavior of the animal, If the animal provides any function inside the aquarium	Raised in captivity	Between 100 and 500 R$	Between 10 and 20 fish	5	No	Physical shops and petshops, Online stores (free market, olx, aquarium store websites)	No	No	Once every 15 days	Yes	Kept in the aquarium	Yes	I make a donation	No	aquarism forums, Internet searches (google, blogs)	Fewer fish will be available for trade in the future due to excessive catch and loss of natural habitats	On the Internet
401	2019-02-12 17:46:42	Hobbysta (ornamental fish breeder only)	Between 5 and 10 years	Behavior - are easy animals to care for, do not make noise	Freshwater	Animal price, Behavior of the animal, If the animal provides any function inside the aquarium	Wild caught in nature	Less than 100 R$	Between 20 and 50 fish	9	Yes	Physical shops and petshops	No	Yes	Once a week	Yes	Kept in the aquarium	Yes	Sell, I make a donation, Trade with other hobbyists for other fish or aquarium equipment, Release in nature	Yes	aquarism forums, Internet searches (google, blogs), Trial and error	More fish will be available for trade in the future due to cultivation	On the Internet
402	2019-02-12 17:47:00	Hobbysta (ornamental fish breeder only)	More than 10 years ago	Beauty of animals and aquariums	Freshwater	Origin of the animal	Raised in captivity	Less than 100 R$	Between 10 and 20 fish	6	Yes	Physical shops and petshops	Yes	No	Once a week	Yes	Kept in the aquarium	Yes	I make a donation	No	aquarism forums, Internet searches (google, blogs), Trial and error, Book consultation and specific literature, Consult specialized websites	More fish will be available for trade in the future due to cultivation	On the Internet, With fellow aquarists
403	2019-02-12 17:48:14	Hobbysta (ornamental fish breeder only)	Since my childhood	Encouragement, recommendation or inheritance of friends or family	Freshwater	Compatibility with my aquarium and my fauna	Raised in captivity	Less than 100 R$	Between 20 and 50 fish	10	Yes	Physical shops and petshops	No	Yes	Once a week	Yes	Kept in the aquarium	No	I never fell apart	No	aquarism forums, Internet searches (google, blogs), Trial and error, Consult specialized websites, Meu pai me ensinou muito. Ele sempre teve aquario.	Fewer fish will be available for trade in the future due to excessive catch and loss of natural habitats
404	2019-02-12 17:48:53	Hobbysta (ornamental fish breeder only)	Between 5 and 10 years	Beauty of animals and aquariums	Freshwater	Origin of the animal	Raised in captivity	Less than 100 R$	Between 20 and 50 fish	6	No	Physical shops and petshops	Yes	No	Once a week	Yes	Kept in the aquarium	Yes	I make a donation	No	Internet searches (google, blogs), Trial and error, Consult specialized websites	More fish will be available for trade in the future due to cultivation	With specialized professionals, On the Internet, With fellow aquarists
405	2019-02-12 17:49:08	Hobbysta (ornamental fish breeder only)	More than 10 years ago	Beauty of animals and aquariums	Freshwater	Aesthetics of the animal, Origin of the animal, Behavior of the animal, If the animal provides any function inside the aquarium	Raised in captivity	Less than 100 R$	Between 5 and 10 fish	4	No	Physical shops and petshops	Yes	No	Once a week	No	No	Yes	I never fell apart	No	aquarism forums, Internet searches (google, blogs), Trial and error, Book consultation and specific literature	Fewer fish will be available for trade in the future due to excessive catch and loss of natural habitats	On the Internet
406	2019-02-12 17:49:42	Hobbysta (ornamental fish breeder only)	Between 5 and 10 years	Beauty of animals and aquariums, Interesse na ecologia e biologia	Freshwater	Aesthetics of the animal, Behavior of the animal, If the animal provides any function inside the aquarium, Compatibility with my aquarium and my fauna	Raised in captivity	Between 100 and 500 R$	Between 10 and 20 fish	5	No	Physical shops and petshops	Yes	No	Once every 15 days	No	No	Yes	I make a donation	No	aquarism forums, Internet searches (google, blogs), Trial and error, Book consultation and specific literature, Consult specialized websites	Fewer fish will be available for trade in the future due to excessive catch and loss of natural habitats	On the Internet, With fellow aquarists
407	2019-02-12 17:50:56	Hobbysta (ornamental fish breeder only)	Between 1 and 5 years	Beauty of animals and aquariums	Freshwater	Aesthetics of the animal	Raised in captivity	Less than 100 R$	Between 10 and 20 fish	6	No	Physical shops and petshops	No	No	Once every 15 days	Yes	You've given it to another aquarist	Yes	Sell, I make a donation, Trade with other hobbyists for other fish or aquarium equipment	No	aquarism forums, Internet searches (google, blogs), Trial and error, Consult specialized websites	Fewer fish will be available for trade in the future due to excessive catch and loss of natural habitats	With specialized professionals, On the Internet, With fellow aquarists
408	2019-02-12 17:51:02	Hobbysta (ornamental fish breeder only)	Between 5 and 10 years	Passion for fish and aquariums	Freshwater	Aesthetics of the animal, Origin of the animal, Animal behavior	Raised in captivity	Between 100 and 500 R$	Entre 50 e 100 peixes	1	No	Buy directly from suppliers	No	No	Once a week	Yes	Kept in the aquarium, Sold	Yes	Sell, I make a donation	No	aquarism forums, Internet searches (google, blogs), External access, Trial and error, Consult specialized websites	More fish will be available for trade in the future due to cultivation	I treat myself
409	2019-02-12 17:51:35	Hobbysta (ornamental fish breeder only)	Since my childhood	Beauty of animals and aquariums	Freshwater	Fauna	Raised in captivity	Between 100 and 500 R$	Less than 5 fish	4	No	Physical shops and petshops, Aquarism groups on Facebook	No	No	Once a week	Yes	Kept in the aquarium	Yes	Sell, I make a donation	No	aquarism forums, Trial and error	More fish will be available for trade in the future due to cultivation	With specialized professionals, With fellow aquarists
410	2019-02-12 17:51:46	Hobbysta (ornamental fish breeder only)	Since my childhood	Beauty of animals and aquariums	Freshwater	Aesthetics of the animal, Behavior of the animal, If the animal provides any function inside the aquarium, Ease in caring for the animal	Raised in captivity	Less than 100 R$	Between 10 and 20 fish	6	Yes	Physical shops and petshops	No	No	Once a month	Yes	Kept in the aquarium	Yes	I make a donation	No	Internet searches (google, blogs), Consult specialized websites	Fewer fish will be available for trade in the future due to excessive catch and loss of natural habitats	On the Internet
411	2019-02-12 17:53:14	Hobbysta (ornamental fish breeder only)	Between 1 and 5 years	Beauty of animals and aquariums	Freshwater	Origin of the animal, Behavior of the animal, If the animal provides any function inside the aquarium, Ease in caring for the animal	Raised in captivity	Between 500 and 1,000 R$	Between 20 and 50 fish	16	No	Physical shops and petshops, Buy directly from suppliers	Yes	No	Once every 15 days	No	Kept in the aquarium	No	Sell, I make a donation, Trade with other hobbyists for other fish or aquarium equipment	No	aquarism forums, Courses, Internet searches (google, blogs), Trial and error, Book consultation and specific literature, Consult specialized websites	More fish will be available for trade in the future due to cultivation	With specialized professionals, On the Internet, With fellow aquarists
412	2019-02-12 17:54:17	Hobbysta (ornamental fish breeder only)	Less than 1 year ago	Beauty of animals and aquariums	Freshwater	Aesthetics of the animal, Animal behavior, Ease in caring for the animal	Raised in captivity	Less than 100 R$	Between 10 and 20 fish	6	No	Physical shops and petshops	No	No	Once a week	No	No	No	I make a donation, Trade with other hobbyists for other fish or aquarium equipment	No	Internet searches (google, blogs), Trial and error	Fewer fish will be available for trade in the future due to excessive catch and loss of natural habitats	On the Internet, With fellow aquarists
413	2019-02-12 17:54:27	Hobbysta (ornamental fish breeder only)	Between 1 and 5 years	Beauty of animals and aquariums	Freshwater	Aesthetics of the animal, Origin of the animal, If the animal provides any function inside the aquarium	Raised in captivity	Between 100 and 500 R$	Between 20 and 50 fish	17	No	Physical shops and petshops, Buy directly from suppliers	Yes	No	Once a week	No	No	Yes	Sell, Trade with other hobbyists for other fish or aquarium equipment	No	aquarism forums, Internet searches (google, blogs)	More fish will be available for trade in the future due to cultivation	With specialized professionals
414	2019-02-12 17:54:30	Hobbysta (ornamental fish breeder only)	Between 1 and 5 years	Encouragement, recommendation or inheritance of friends or family	Freshwater	Animal behavior	Raised in captivity	Less than 100 R$	Between 10 and 20 fish	9	No	Physical shops and petshops	No	No	Once a week	No	No	Yes	I never fell apart	No	aquarism forums, Internet searches (google, blogs), Consult specialized websites, Conversa com lojista	Fewer fish will be available for trade in the future due to excessive catch and loss of natural habitats	On the Internet, With fellow aquarists
415	2019-02-12 17:55:39	fish farmer/aqua farmer	More than 10 years ago	Interest in ecology and biology (development) of animals/challenge in creating an ecosystem	Freshwater	Origin of the animal	Raised in captivity	Less than 100 R$	Between 500 and 1000 fish	0	No	Buy directly from suppliers	Yes	No	Once a month	Yes	Sold	Yes	Sell	No	Courses, Book consultation and specific literature	More fish will be available for trade in the future due to cultivation	With specialized professionals
416	2019-02-12 17:57:21	Hobbysta (ornamental fish breeder only)	Since my childhood	Beauty of animals and aquariums	Freshwater	Aesthetics of the animal, Origin of the animal, Behavior of the animal, If the animal provides any function inside the aquarium, Ease in caring for the animal	Raised in captivity	Less than 100 R$	Between 5 and 10 fish	1	No	Physical shops and petshops	Yes	No	Once every 15 days	Yes	Kept in the aquarium	Yes	I make a donation	No	aquarism forums, Courses, Internet searches (google, blogs), Trial and error, Book consultation and specific literature, Com meu irmão	More fish will be available for trade in the future due to cultivation	On the Internet
417	2019-02-12 18:00:30	Hobbysta (ornamental fish breeder only)	Less than 1 year ago	Beauty of animals and aquariums	Freshwater	Animal price, Animal behavior, Ease in caring for the animal	Raised in captivity	Less than 100 R$	Between 5 and 10 fish	2	No	Physical shops and petshops	No	No	Once every 15 days	No	No	No	I never fell apart	No	aquarism forums, Internet searches (google, blogs)	More fish will be available for trade in the future due to cultivation
418	2019-02-12 18:01:10	Hobbysta (ornamental fish breeder only)	Between 1 and 5 years	Beauty of animals and aquariums	Freshwater	Aesthetics of the animal, Animal behavior	Raised in captivity	Less than 100 R$	Between 20 and 50 fish	5	Yes	Physical shops and petshops, Online stores (free market, olx, aquarium store websites)	Yes	No	More than once a week	Yes	Kept in the aquarium	Yes	I make a donation, Trade with other hobbyists for other fish or aquarium equipment	No	aquarism forums, Internet searches (google, blogs), Book consultation and specific literature, Consult specialized websites	Fewer fish will be available for trade in the future due to excessive catch and loss of natural habitats	With specialized professionals, With fellow aquarists
419	2019-02-12 18:02:27	Hobbysta (ornamental fish breeder only)	Between 5 and 10 years	Beauty of animals and aquariums	Freshwater	Animal behavior	Raised in captivity	Less than 100 R$	Between 20 and 50 fish	6	No	Buy directly from suppliers	No	No	Once a week	Yes	Kept in the aquarium	No	Release in nature	No	aquarism forums, Internet searches (google, blogs), Trial and error, Book consultation and specific literature, Consult specialized websites	More fish will be available for trade in the future due to cultivation	On the Internet
420	2019-02-12 18:02:37	Hobbysta (ornamental fish breeder only)	Between 1 and 5 years	Beauty of animals and aquariums, Encouragement, recommendation or inheritance of friends or family	Freshwater	Animal price, Aesthetics of the animal, Origin of the animal	Raised in captivity	Between 100 and 500 R$	Entre 100 e 500 peixes	3	No	Physical shops and petshops, Aquarism groups on Facebook	No	No	Once a month	Yes	Kept in the aquarium, You've given it to another aquarist, Swapped with another aquarist for another fish	Yes	I make a donation, Trade with other hobbyists for other fish or aquarium equipment	No	aquarism forums, Internet searches (google, blogs), Trial and error, Consult specialized websites	Fewer fish will be available for trade in the future due to excessive catch and loss of natural habitats	With specialized professionals, On the Internet, With fellow aquarists
421	2019-02-12 18:04:27	Hobbysta (ornamental fish breeder only)	Less than 1 year ago	Beauty of animals and aquariums	Freshwater	Origin of the animal, Animal behavior	Raised in captivity	Less than 100 R$	Between 20 and 50 fish	7	Yes	Physical shops and petshops	No	No	Once a week	Yes	Kept in the aquarium	No	I make a donation	No	Internet searches (google, blogs), Consult specialized websites	Fewer fish will be available for trade in the future due to excessive catch and loss of natural habitats
422	2019-02-12 18:05:39	Hobbysta (ornamental fish breeder only)	Less than 1 year ago	Beauty of animals and aquariums	Freshwater	Animal behavior	Raised in captivity	Less than 100 R$	Between 5 and 10 fish	3	Yes	Physical shops and petshops	No	No	Once a week	No	No	No	I make a donation	No	Internet searches (google, blogs), youtube	More fish will be available for trade in the future due to cultivation	With specialized professionals, On the Internet, With fellow aquarists
423	2019-02-12 18:06:18	Hobbysta (ornamental fish breeder only)	More than 10 years ago	Beauty of animals and aquariums	Freshwater	Animal behavior	Raised in captivity	Between 100 and 500 R$	Between 20 and 50 fish	6	No	Buy directly from suppliers	No	No	Every 2 months	Yes	Kept in the aquarium, You've given it to another aquarist	Yes	I make a donation	No	Courses, External access, Trial and error, Book consultation and specific literature, Consult specialized websites	More fish will be available for trade in the future due to cultivation	On the Internet
424	2019-02-12 18:06:26	Hobbysta (ornamental fish breeder only)	Since my childhood	Beauty of animals and aquariums	Freshwater	Origin of the animal	Raised in captivity	Between 100 and 500 R$	more than a thousand	13	Yes	Physical shops and petshops, Aquarism groups on Facebook, Buy directly from suppliers	No	No	Once a week	Yes	Kept in the aquarium	Yes	I make a donation, Trade with other hobbyists for other fish or aquarium equipment	No	aquarism forums, Courses, Trial and error, Book consultation and specific literature, Consult specialized websites	More fish will be available for trade in the future due to cultivation	With fellow aquarists
425	2019-02-12 18:06:47	Hobbysta (ornamental fish breeder only)	Since my childhood	Beauty of animals and aquariums	Freshwater	Aesthetics of the animal	Raised in captivity	Between 100 and 500 R$	Between 20 and 50 fish	19	Yes	Physical shops and petshops, Capture in nature (lakes, rivers, ocean)	No	Yes	Once a week	Yes	Kept in the aquarium	Yes	I make a donation	Yes	aquarism forums, Internet searches (google, blogs), Book consultation and specific literature, Consult specialized websites	More fish will be available for trade in the future due to cultivation	On the Internet
426	2019-02-12 18:08:08	Hobbysta (ornamental fish breeder only)	Less than 1 year ago	Beauty of animals and aquariums	Freshwater	Origin of the animal	Raised in captivity	Less than 100 R$	Between 20 and 50 fish	2	No	Physical shops and petshops	No	No	More than once a week	Yes	Kept in the aquarium	No	Sell, I make a donation	No	aquarism forums, Internet searches (google, blogs), Trial and error	More fish will be available for trade in the future due to cultivation	On the Internet
427	2019-02-12 18:07:42	Hobbysta (ornamental fish breeder only)	More than 10 years ago	Beauty of animals and aquariums	Freshwater	Animal behavior	Raised in captivity	Between 100 and 500 R$	Between 20 and 50 fish	3	No	Physical shops and petshops	No	No	Once a week	Yes	Kept in the aquarium	Yes	I make a donation	No	Internet searches (google, blogs)	More fish will be available for trade in the future due to cultivation	With specialized professionals
428	2019-02-12 18:09:52	Hobbysta (ornamental fish breeder only)	Between 1 and 5 years	Beauty of animals and aquariums	Freshwater	Aesthetics of the animal, Animal behavior	Raised in captivity	Less than 100 R$	Between 10 and 20 fish	5	No	Physical shops and petshops, Online stores (free market, olx, aquarium store websites)	No	No	Once a week	Yes	Kept in the aquarium	Yes	I make a donation	No	aquarism forums, Internet searches (google, blogs), Trial and error, Book consultation and specific literature, Consult specialized websites	More fish will be available for trade in the future due to cultivation	On the Internet
429	2019-02-12 18:11:34	Hobbysta (ornamental fish breeder only)	Between 1 and 5 years	Beauty of animals and aquariums	Freshwater	Animal behavior	Raised in captivity	Less than 100 R$	Less than 5 fish	1	No	Physical shops and petshops	No	No	Once a week	Yes	Kept in the aquarium	No	I make a donation	No	aquarism forums, Internet searches (google, blogs)	More fish will be available for trade in the future due to cultivation	On the Internet
430	2019-02-12 18:15:23	Hobbysta (ornamental fish breeder only)	Between 1 and 5 years	Beauty of animals and aquariums	Freshwater	Aesthetics of the animal, Animal behavior	Raised in captivity	Less than 100 R$	Between 5 and 10 fish	5	No	Physical shops and petshops	No	No	Once a week	No	No	Yes	I make a donation, Trade with other hobbyists for other fish or aquarium equipment	No	aquarism forums, Internet searches (google, blogs), Trial and error, Consult specialized websites	More fish will be available for trade in the future due to cultivation	On the Internet, With fellow aquarists
431	2019-02-12 18:16:16	Hobbysta (ornamental fish breeder only)	Between 5 and 10 years	Beauty of animals and aquariums	Freshwater	Animal behavior	Raised in captivity	Between 100 and 500 R$	Between 20 and 50 fish	1	Yes	Physical shops and petshops	No	No	More than once a week	Yes	Kept in the aquarium	Yes	I make a donation	No	aquarism forums, Internet searches (google, blogs), Trial and error, Book consultation and specific literature, Consult specialized websites	Fewer fish will be available for trade in the future due to excessive catch and loss of natural habitats	On the Internet, With fellow aquarists
432	2019-02-12 18:16:24	Hobbysta (ornamental fish breeder only)	Between 1 and 5 years	Beauty of animals and aquariums	Freshwater	Origin of the animal	Raised in captivity	Less than 100 R$	Between 10 and 20 fish	4	No	Physical shops and petshops	No	No	Once every 15 days	No	Kept in the aquarium	Yes	I make a donation, Trade with other hobbyists for other fish or aquarium equipment	No	aquarism forums, Internet searches (google, blogs), Trial and error, Consult specialized websites	More fish will be available for trade in the future due to cultivation	On the Internet, With fellow aquarists
433	2019-02-12 18:17:00	Hobbysta (ornamental fish breeder only)	Since my childhood	Beauty of animals and aquariums	Freshwater	animal health	Raised in captivity	Less than 100 R$	Between 10 and 20 fish	6	No	Physical shops and petshops	No	No	Once a month	Yes	died	Yes	I make a donation	No	Internet searches (google, blogs), External access, Consult specialized websites	More fish will be available for trade in the future due to cultivation	On the Internet
434	2019-02-12 18:17:03	Hobbysta (ornamental fish breeder only)	More than 10 years ago	Commercial interest - in addition to creating, you sell ornamental fish, Beauty of animals and aquariums	Freshwater	Animal price, Aesthetics of the animal, Animal behavior	Indifferent	Less than 100 R$	Less than 5 fish	2	No	Physical shops and petshops, Capture in nature (lakes, rivers, ocean)	No	Yes	Once a week	Yes	Kept in the aquarium, Sold, You've given it to another aquarist, Swapped with another aquarist for another fish, Realizei pesquisas científicass	Yes	I make a donation	No	Internet searches (google, blogs), External access, Trial and error, Book consultation and specific literature, Consult specialized websites, Nas disciplinas da faculdade, no mestrado e atualmente do doltorado	More fish will be available for trade in the future due to cultivation	With specialized professionals, On the Internet, I treat myself
435	2019-02-12 18:19:15	Hobbysta and Seller	More than 10 years ago	Beauty of animals and aquariums	Freshwater	Animal price, Aesthetics of the animal, Origin of the animal	Raised in captivity	Between 500 and 1,000 R$	Between 20 and 50 fish	3	No	Buy directly from suppliers	No	No	More than once a week	Yes	Kept in the aquarium, Sold, Swapped with another aquarist for another fish	Yes	Trade with other hobbyists for other fish or aquarium equipment	No	aquarism forums, Courses, Internet searches (google, blogs), Trial and error, Book consultation and specific literature, Consult specialized websites	Fewer fish will be available for trade in the future due to excessive catch and loss of natural habitats	On the Internet
436	2019-02-12 18:19:34	Hobbysta (ornamental fish breeder only)	Between 1 and 5 years	Beauty of animals and aquariums	Freshwater	Aesthetics of the animal, Origin of the animal, Animal behavior	Raised in captivity	Less than 100 R$	Between 10 and 20 fish	4	No	Physical shops and petshops, Aquarism groups on Facebook, Buy directly from suppliers	Yes	No	Once every 15 days	No	Kept in the aquarium, Sold, You've given it to another aquarist, Swapped with another aquarist for another fish	Yes	Sell, I make a donation, Trade with other hobbyists for other fish or aquarium equipment	No	aquarism forums, Internet searches (google, blogs), Trial and error, Consult specialized websites	Fewer fish will be available for trade in the future due to excessive catch and loss of natural habitats	With specialized professionals, On the Internet
437	2019-02-12 18:22:30	Hobbysta (ornamental fish breeder only)	Between 1 and 5 years	Beauty of animals and aquariums, Behavior - are easy animals to care for, do not make noise	Freshwater	Aesthetics of the animal, Origin of the animal, Animal behavior	Raised in captivity	Between 100 and 500 R$	Between 5 and 10 fish	6	Yes	Physical shops and petshops	Yes	No	More than once a week	No	No	Yes	I never fell apart	No	aquarism forums, Internet searches (google, blogs), Consult specialized websites, Grupo de aquarismo no Facebook	Fewer fish will be available for trade in the future due to excessive catch and loss of natural habitats	On the Internet, With fellow aquarists
438	2019-02-12 18:24:17	Hobbysta (ornamental fish breeder only)	Since my childhood	Beauty of animals and aquariums	Freshwater	Origin of the animal, Behavior of the animal, If the animal provides any function inside the aquarium	Raised in captivity	Less than 100 R$	Between 20 and 50 fish	3	No	Physical shops and petshops	Yes	No	More than once a week	Yes	Kept in the aquarium	Yes	I make a donation, Trade with other hobbyists for other fish or aquarium equipment	No	Internet searches (google, blogs), Consult specialized websites	More fish will be available for trade in the future due to cultivation	With specialized professionals, On the Internet, With fellow aquarists
439	2019-02-12 18:25:21	Hobbysta (ornamental fish breeder only)	Less than 1 year ago	Beauty of animals and aquariums	Freshwater	Aesthetics of the animal, Animal behavior	Raised in captivity	Between 100 and 500 R$	Between 20 and 50 fish	8	Yes	Physical shops and petshops, Online stores (free market, olx, aquarium store websites)	No	No	Once a week	No	No	No	I make a donation	No	aquarism forums, Internet searches (google, blogs), Book consultation and specific literature, Consult specialized websites	More fish will be available for trade in the future due to cultivation	On the Internet, With fellow aquarists
440	2019-02-12 18:26:08	Hobbysta (ornamental fish breeder only)	More than 10 years ago	Passion for fish and aquariums	Freshwater	Origin of the animal, Behavior of the animal, If the animal provides any function inside the aquarium	Raised in captivity	Between 100 and 500 R$	Between 20 and 50 fish	11	Yes	Physical shops and petshops	Yes	No	As needed	Yes	Kept in the aquarium, You've given it to another aquarist	No	I make a donation	No	Courses, Book consultation and specific literature	More fish will be available for trade in the future due to cultivation
441	2019-02-12 18:29:23	Hobbysta (ornamental fish breeder only)	Less than 1 year ago	Beauty of animals and aquariums	Freshwater	Animal behavior	Raised in captivity	Between 100 and 500 R$	Less than 5 fish	1	No	Buy directly from suppliers	Yes	No	More than once a week	No	Swapped with another aquarist for another fish	No	I make a donation	No	aquarism forums	More fish will be available for trade in the future due to cultivation	With fellow aquarists
442	2019-02-12 18:29:29	Hobbysta and Seller	Since my childhood	Beauty of animals and aquariums	Freshwater	Animal behavior	Raised in captivity	Entre mil e 2 mil reais	Between 20 and 50 fish	7	No	Physical shops and petshops, Aquarism groups on Facebook, Buy directly from suppliers	No	No	Once every 15 days	Yes	Kept in the aquarium, Sold, You've given it to another aquarist	Yes	I make a donation	No	Com o.meu pai minha experiência vem de berço	More fish will be available for trade in the future due to cultivation	With specialized professionals, With fellow aquarists, I treat myself
443	2019-02-12 18:29:39	Hobbysta (ornamental fish breeder only)	Since my childhood	Beauty of animals and aquariums, Encouragement, recommendation or inheritance of friends or family	Freshwater	Animal price, Aesthetics of the animal, Origin of the animal, Animal behavior	Raised in captivity	Less than 100 R$	Between 20 and 50 fish	12	Yes	Physical shops and petshops, Buy directly from suppliers	No	No	Once a week	Yes	Kept in the aquarium	Yes	Sell, I make a donation, Trade with other hobbyists for other fish or aquarium equipment	No	aquarism forums, Internet searches (google, blogs), Trial and error, Book consultation and specific literature, Consult specialized websites	Fewer fish will be available for trade in the future due to excessive catch and loss of natural habitats	On the Internet, With fellow aquarists
444	2019-02-12 18:29:41	Hobbysta (ornamental fish breeder only)	Since my childhood	Beauty of animals and aquariums	Freshwater	Animal behavior	Raised in captivity	Less than 100 R$	Between 5 and 10 fish	4	No	Physical shops and petshops	No	No	Once a month	Yes	Kept in the aquarium	Yes	I make a donation	No	Book consultation and specific literature	More fish will be available for trade in the future due to cultivation	With specialized professionals
445	2019-02-12 18:30:00	Hobbysta (ornamental fish breeder only)	Between 5 and 10 years	Beauty of animals and aquariums	Freshwater	Aesthetics of the animal, Behavior of the animal, If the animal provides any function inside the aquarium	Raised in captivity	Between 100 and 500 R$	Between 10 and 20 fish	1	No	Physical shops and petshops, Online stores (free market, olx, aquarium store websites), Aquarism groups on Facebook	No	No	Once a month	Yes	You've given it to another aquarist	Yes	I make a donation	No	aquarism forums, Internet searches (google, blogs), Book consultation and specific literature	More fish will be available for trade in the future due to cultivation	On the Internet, With fellow aquarists
446	2019-02-12 18:32:00	Hobbysta (ornamental fish breeder only)	Since my childhood	Beauty of animals and aquariums, Behavior - are easy animals to care for, do not make noise	The two options	Animal price, Aesthetics of the animal, Origin of the animal, Animal behavior	Raised in captivity	Less than 100 R$	Between 20 and 50 fish	14	Yes	Physical shops and petshops, Aquarism groups on Facebook	No	No	Once a week	Yes	Kept in the aquarium, You've given it to another aquarist, Swapped with another aquarist for another fish	Yes	I make a donation, Trade with other hobbyists for other fish or aquarium equipment	No	aquarism forums, Internet searches (google, blogs), External access, Trial and error, Book consultation and specific literature, Consult specialized websites	Fewer fish will be available for trade in the future due to excessive catch and loss of natural habitats	With specialized professionals, On the Internet, With fellow aquarists
447	2019-02-12 18:32:38	Hobbysta (ornamental fish breeder only)	More than 10 years ago	Beauty of animals and aquariums	Freshwater	Animal price, Aesthetics of the animal, Behavior of the animal, If the animal provides any function inside the aquarium, Ease in caring for the animal	Raised in captivity	Less than 100 R$	Between 10 and 20 fish	1	Yes	Physical shops and petshops	No	No	Once every 15 days	Yes	Kept in the aquarium, You've given it to another aquarist	Yes	I make a donation	No	Internet searches (google, blogs), Trial and error, Consult specialized websites	Fewer fish will be available for trade in the future due to excessive catch and loss of natural habitats	With fellow aquarists
448	2019-02-12 18:33:08	Hobbysta (ornamental fish breeder only)	Between 1 and 5 years	Beauty of animals and aquariums	Freshwater	If the animal provides any function inside the aquarium, Ease in caring for the animal	Raised in captivity	Between 100 and 500 R$	Between 10 and 20 fish	8	Yes	Physical shops and petshops	No	No	Once a month	Yes	Kept in the aquarium, You've given it to another aquarist	Yes	I make a donation	No	aquarism forums, Internet searches (google, blogs)	More fish will be available for trade in the future due to cultivation	On the Internet
449	2019-02-12 18:34:04	Hobbysta (ornamental fish breeder only)	Since my childhood	Interest in ecology and biology (development) of animals/challenge in creating an ecosystem	Freshwater	Possibility of breeding animals	Raised in captivity	Less than 100 R$	Between 5 and 10 fish	6	No	Physical shops and petshops, Buy directly from suppliers, Capture in nature (lakes, rivers, ocean)	No	Yes	Once every 15 days	Yes	released in nature	Yes	Release in nature	Yes	Trial and error, Book consultation and specific literature	More fish will be available for trade in the future due to cultivation	I treat myself
450	2019-02-12 18:34:05	Hobbysta (ornamental fish breeder only)	Since my childhood	Beauty of animals and aquariums	Freshwater	Shop/seller recommendation, Behavior of the animal, If the animal provides any function inside the aquarium, Ease in caring for the animal	Raised in captivity	Less than 100 R$	Between 10 and 20 fish	3	No	Physical shops and petshops	No	No	Once every 15 days	Yes	Kept in the aquarium, Swapped with another aquarist for another fish	Yes	I make a donation, Trade with other hobbyists for other fish or aquarium equipment	No	aquarism forums, Internet searches (google, blogs), Trial and error	More fish will be available for trade in the future due to cultivation	With specialized professionals, On the Internet
451	2019-02-12 18:34:51	Hobbysta (ornamental fish breeder only)	Between 1 and 5 years	Beauty of animals and aquariums	Freshwater	Animal behavior	Raised in captivity	Less than 100 R$	Between 10 and 20 fish	1	No	Physical shops and petshops	No	No	Once a month	Yes	Kept in the aquarium	Yes	I make a donation	No	aquarism forums, Internet searches (google, blogs), Trial and error, Consult specialized websites	Fewer fish will be available for trade in the future due to excessive catch and loss of natural habitats	On the Internet, With fellow aquarists
452	2019-02-12 18:35:19	Hobbysta (ornamental fish breeder only)	More than 10 years ago	Beauty of animals and aquariums	Freshwater	Origin of the animal, Animal behavior	Raised in captivity	Less than 100 R$	Between 10 and 20 fish	7	No	Physical shops and petshops, Online stores (free market, olx, aquarium store websites)	No	No	Once every 15 days	Yes	Kept in the aquarium	Yes	Trade with other hobbyists for other fish or aquarium equipment	No	Um grande amigo logista	More fish will be available for trade in the future due to cultivation	I don't seek treatment
453	2019-02-12 18:39:18	Hobbysta (ornamental fish breeder only)	Between 5 and 10 years	Beauty of animals and aquariums	Freshwater	Animal behavior	Raised in captivity	Less than 100 R$	Between 20 and 50 fish	12	Yes	Physical shops and petshops, Aquarism groups on Facebook, Capture in nature (lakes, rivers, ocean)	Yes	Yes	Once every 15 days	Yes	Kept in the aquarium	Yes	I make a donation, Trade with other hobbyists for other fish or aquarium equipment	No	aquarism forums, Internet searches (google, blogs), Book consultation and specific literature, Consult specialized websites	More fish will be available for trade in the future due to cultivation	With specialized professionals, With fellow aquarists
454	2019-02-12 18:41:59	Hobbysta and Seller	Less than 1 year ago	Beauty of animals and aquariums	Freshwater	Aesthetics of the animal	Raised in captivity	Less than 100 R$	Between 10 and 20 fish	3	No	Aquarism groups on Facebook	No	No	Once a week	Yes	Kept in the aquarium	Yes	I make a donation	No	Internet searches (google, blogs), Trial and error, Book consultation and specific literature	More fish will be available for trade in the future due to cultivation	With fellow aquarists
455	2019-02-12 18:43:29	Hobbysta (ornamental fish breeder only)	More than 10 years ago	Beauty of animals and aquariums	Freshwater	Ease in caring for the animal	Raised in captivity	Less than 100 R$	Between 20 and 50 fish	5	No	Physical shops and petshops	No	No	Once a week	Yes	Kept in the aquarium	Yes	I make a donation	No	aquarism forums, Internet searches (google, blogs), Trial and error, Book consultation and specific literature, Consult specialized websites	More fish will be available for trade in the future due to cultivation	With specialized professionals
456	2019-02-12 18:45:16	Hobbysta (ornamental fish breeder only)	Between 1 and 5 years	Beauty of animals and aquariums	Freshwater	Animal price, Origin of the animal, Animal behavior, Ease in caring for the animal	Raised in captivity	Less than 100 R$	Between 5 and 10 fish	4	No	Physical shops and petshops	Yes	No	Once every 15 days	No	No	Yes	I make a donation	No	Internet searches (google, blogs), Trial and error, Consult specialized websites	More fish will be available for trade in the future due to cultivation	On the Internet
457	2019-02-12 18:47:07	Hobbysta (ornamental fish breeder only)	Between 1 and 5 years	Beauty of animals and aquariums	Freshwater	Aesthetics of the animal, Origin of the animal, Behavior of the animal, If the animal provides any function inside the aquarium	Raised in captivity	Less than 100 R$	Between 5 and 10 fish	1	No	Physical shops and petshops	Yes	No	Once every 15 days	No	You've given it to another aquarist	No	I make a donation	No	aquarism forums, External access, Consult specialized websites	Fewer fish will be available for trade in the future due to excessive catch and loss of natural habitats	With specialized professionals
458	2019-02-12 18:50:45	Hobbysta (ornamental fish breeder only)	Since my childhood	Beauty of animals and aquariums	Freshwater	Aesthetics of the animal, If the animal provides any function inside the aquarium, Ease in caring for the animal	Raised in captivity	Less than 100 R$	Between 10 and 20 fish	3	No	Physical shops and petshops	No	No	Once every 15 days	Yes	Kept in the aquarium	Yes	I make a donation, Trade with other hobbyists for other fish or aquarium equipment	No	aquarism forums, Internet searches (google, blogs), External access, Trial and error, Book consultation and specific literature, Consult specialized websites	More fish will be available for trade in the future due to cultivation	On the Internet, With fellow aquarists
459	2019-02-12 18:58:12	Hobbysta (ornamental fish breeder only)	Between 1 and 5 years	Beauty of animals and aquariums	Freshwater	Origin of the animal, Animal behavior	Raised in captivity	Between 100 and 500 R$	Between 20 and 50 fish	7	Yes	Physical shops and petshops	No	No	More than once a week	Yes	Kept in the aquarium, You've given it to another aquarist, Swapped with another aquarist for another fish	Yes	I make a donation, Trade with other hobbyists for other fish or aquarium equipment	No	aquarism forums, Internet searches (google, blogs), Book consultation and specific literature, Consult specialized websites	Fewer fish will be available for trade in the future due to excessive catch and loss of natural habitats	With specialized professionals, With fellow aquarists
460	2019-02-12 19:04:19	Hobbysta (ornamental fish breeder only)	Less than 1 year ago	Beauty of animals and aquariums	Freshwater	Origin of the animal	Raised in captivity	Between 100 and 500 R$	Between 20 and 50 fish	2	No	Physical shops and petshops	Yes	No	Once a week	Yes	Kept in the aquarium	No	Sell, I make a donation	No	aquarism forums, Internet searches (google, blogs), Trial and error, Book consultation and specific literature, Consult specialized websites	More fish will be available for trade in the future due to cultivation	With specialized professionals, On the Internet, With fellow aquarists
461	2019-02-12 19:04:40	Hobbysta (ornamental fish breeder only)	Between 5 and 10 years	Passion for fish and aquariums	Freshwater	Animal price, Shop/seller recommendation, Aesthetics of the animal, Origin of the animal, Animal behavior	Raised in captivity	Between 100 and 500 R$	Between 20 and 50 fish	7	Yes	Physical shops and petshops	No	No	Once a week	No	No	No	Sell, I make a donation, Trade with other hobbyists for other fish or aquarium equipment	No	Internet searches (google, blogs), Trial and error	More fish will be available for trade in the future due to cultivation	On the Internet, With fellow aquarists
462	2019-02-12 19:06:58	Hobbysta (ornamental fish breeder only)	Between 1 and 5 years	Beauty of animals and aquariums, Behavior - are easy animals to care for, do not make noise	Freshwater	Animal behavior	Raised in captivity	Less than 100 R$	Less than 5 fish	1	No	Buy directly from suppliers	No	No	Once a month	No	No	Yes	Trade with other hobbyists for other fish or aquarium equipment	No	Internet searches (google, blogs), Trial and error, Consult specialized websites	Fewer fish will be available for trade in the future due to excessive catch and loss of natural habitats	With specialized professionals
463	2019-02-12 19:08:35	Hobbysta (ornamental fish breeder only)	Between 1 and 5 years	Beauty of animals and aquariums	Freshwater	Animal price, Aesthetics of the animal, Ease in caring for the animal	Raised in captivity	Between 100 and 500 R$	Between 5 and 10 fish	3	No	Physical shops and petshops, Aquarism groups on Facebook, Buy directly from suppliers	No	No	Once a week	Yes	Kept in the aquarium	No	Trade with other hobbyists for other fish or aquarium equipment	No	Internet searches (google, blogs), External access, Consult specialized websites, Trabalhei com producao	More fish will be available for trade in the future due to cultivation	With fellow aquarists, I treat myself
464	2019-02-12 19:10:46	Hobbysta (ornamental fish breeder only)	Between 1 and 5 years	Beauty of animals and aquariums	Freshwater	Aesthetics of the animal, Origin of the animal, Animal behavior	Raised in captivity	Between 100 and 500 R$	Between 5 and 10 fish	7	Yes	Physical shops and petshops, Aquarism groups on Facebook, Buy directly from suppliers	No	No	Once a week	No	Sold, You've given it to another aquarist, Swapped with another aquarist for another fish	Yes	Sell, I make a donation, Trade with other hobbyists for other fish or aquarium equipment	No	aquarism forums, Courses, Internet searches (google, blogs), External access, Trial and error, Book consultation and specific literature, Consult specialized websites	More fish will be available for trade in the future due to cultivation	On the Internet, With fellow aquarists
465	2019-02-12 19:14:43	Hobbysta (ornamental fish breeder only)	Between 1 and 5 years	Commercial interest - in addition to creating, you sell ornamental fish	Freshwater	Aesthetics of the animal	Raised in captivity	Less than 100 R$	Between 20 and 50 fish	2	No	Buy directly from suppliers	No	No	More than once a week	Yes	Kept in the aquarium, Sold, You've given it to another aquarist, Swapped with another aquarist for another fish	No	Sell, I make a donation, Trade with other hobbyists for other fish or aquarium equipment	No	aquarism forums, Internet searches (google, blogs), Book consultation and specific literature, Consult specialized websites	More fish will be available for trade in the future due to cultivation	On the Internet, With fellow aquarists, I don't seek treatment
466	2019-02-12 19:15:38	Hobbysta (ornamental fish breeder only)	Between 5 and 10 years	Beauty of animals and aquariums	Freshwater	Animal price, Aesthetics of the animal, Behavior of the animal, If the animal provides any function inside the aquarium, Ease in caring for the animal	Indifferent	Less than 100 R$	Between 20 and 50 fish	8	No	Physical shops and petshops	No	No	Once a week	Yes	Kept in the aquarium, You've given it to another aquarist, Swapped with another aquarist for another fish	Yes	Sell, I make a donation, Trade with other hobbyists for other fish or aquarium equipment	No	aquarism forums, Internet searches (google, blogs), Trial and error, Book consultation and specific literature, Consult specialized websites	Fewer fish will be available for trade in the future due to excessive catch and loss of natural habitats	On the Internet, With fellow aquarists
467	2019-02-12 19:15:39	Hobbysta (ornamental fish breeder only)	Since my childhood	Beauty of animals and aquariums	Freshwater	Origin of the animal	Raised in captivity	Less than 100 R$	Between 5 and 10 fish	5	Yes	Physical shops and petshops	Yes	No	Once a week	Yes	Kept in the aquarium	Yes	I make a donation	No	aquarism forums, Internet searches (google, blogs), Trial and error, Book consultation and specific literature, Consult specialized websites	More fish will be available for trade in the future due to cultivation	On the Internet
468	2019-02-12 19:17:32	Hobbysta (ornamental fish breeder only)	Since my childhood	Beauty of animals and aquariums	Freshwater	Animal behavior	Raised in captivity	Less than 100 R$	Between 5 and 10 fish	4	No	Physical shops and petshops	No	No	Once a week	No	No	No	I make a donation	Yes	Trial and error	More fish will be available for trade in the future due to cultivation	With specialized professionals
469	2019-02-12 19:19:05	Hobbysta (ornamental fish breeder only)	Since my childhood	Commercial interest - in addition to creating, you sell ornamental fish, Beauty of animals and aquariums, Encouragement, recommendation or inheritance of friends or family, Behavior - are easy animals to care for, do not make noise	Freshwater	Animal price, Aesthetics of the animal, Origin of the animal, Animal behavior	Raised in captivity	Less than 100 R$	Between 5 and 10 fish	5	No	Physical shops and petshops, Aquarism groups on Facebook, Buy directly from suppliers	Yes	No	Once a week	Yes	Kept in the aquarium	Yes	Sell, I make a donation	No	aquarism forums, Internet searches (google, blogs), Consult specialized websites	More fish will be available for trade in the future due to cultivation	With fellow aquarists
470	2019-02-12 19:20:44	Hobbysta (ornamental fish breeder only)	Between 5 and 10 years	Beauty of animals and aquariums	Freshwater	Aesthetics of the animal, Origin of the animal, Animal behavior	Raised in captivity	Between 100 and 500 R$	Between 10 and 20 fish	2	No	Buy directly from suppliers	No	No	Once a month	Yes	Kept in the aquarium	Yes	Trade with other hobbyists for other fish or aquarium equipment	No	aquarism forums, Trial and error, Consult specialized websites	Fewer fish will be available for trade in the future due to excessive catch and loss of natural habitats	With fellow aquarists
471	2019-02-12 19:20:58	Hobbysta (ornamental fish breeder only)	Since my childhood	Beauty of animals and aquariums	Freshwater	Origin of the animal	Raised in captivity	Between 100 and 500 R$	Between 20 and 50 fish	19	Yes	Physical shops and petshops	No	Yes	Once every 15 days	Yes	Kept in the aquarium	Yes	I make a donation	No	aquarism forums, Internet searches (google, blogs), Trial and error, Book consultation and specific literature, Consult specialized websites	More fish will be available for trade in the future due to cultivation	On the Internet
472	2019-02-12 19:21:33	Hobbysta (ornamental fish breeder only)	Less than 1 year ago	Beauty of animals and aquariums	Freshwater	Aesthetics of the animal, Animal behavior, Ease in caring for the animal	Raised in captivity	Between 100 and 500 R$	Between 10 and 20 fish	11	No	Physical shops and petshops, Online stores (free market, olx, aquarium store websites)	Yes	No	Once a week	Yes	Kept in the aquarium	Yes	Trade with other hobbyists for other fish or aquarium equipment	No	Internet searches (google, blogs)	More fish will be available for trade in the future due to cultivation	On the Internet
473	2019-02-12 19:22:08	Hobbysta (ornamental fish breeder only)	Between 5 and 10 years	Commercial interest - in addition to creating, you sell ornamental fish, Beauty of animals and aquariums	Freshwater	Aesthetics of the animal, Behavior of the animal, If the animal provides any function inside the aquarium	Raised in captivity	Less than 100 R$	Between 20 and 50 fish	4	Yes	Physical shops and petshops, Aquarism groups on Facebook, Buy directly from suppliers	Yes	No	Once every 15 days	Yes	Sold	Yes	I make a donation, Trade with other hobbyists for other fish or aquarium equipment	Yes	Courses, Book consultation and specific literature	Fewer fish will be available for trade in the future due to excessive catch and loss of natural habitats	With specialized professionals, On the Internet
474	2019-02-12 19:26:04	Hobbysta (ornamental fish breeder only)	Since my childhood	Beauty of animals and aquariums	Freshwater	Aesthetics of the animal, Animal behavior	Raised in captivity	Less than 100 R$	Between 10 and 20 fish	1	Yes	Buy directly from suppliers	No	No	Do not do	Yes	Sold, You've given it to another aquarist, Swapped with another aquarist for another fish	Yes	Sell, I make a donation, Trade with other hobbyists for other fish or aquarium equipment	No	aquarism forums, Internet searches (google, blogs), Trial and error, Book consultation and specific literature, Consult specialized websites	More fish will be available for trade in the future due to cultivation	With fellow aquarists
475	2019-02-12 19:26:42	Hobbysta (ornamental fish breeder only)	Less than 1 year ago	Beauty of animals and aquariums	Marine	Aesthetics of the animal	Raised in captivity	Between 100 and 500 R$	Less than 5 fish	1	No	Physical shops and petshops	Yes	No	Once every 15 days	No	No	No	I make a donation, Trade with other hobbyists for other fish or aquarium equipment	No	aquarism forums, Internet searches (google, blogs)	More fish will be available for trade in the future due to cultivation
476	2019-02-12 19:30:48	Seller	Since my childhood	Beauty of animals and aquariums	The two options	Compatibilidade com demais habitantes do aquário	Raised in captivity	Between 100 and 500 R$	Between 5 and 10 fish	2	Yes	Buy directly from suppliers	Yes	No	Once every 15 days	No	No	Yes	I make a donation	No	Book consultation and specific literature, Consult specialized websites	More fish will be available for trade in the future due to cultivation	With fellow aquarists
477	2019-02-12 19:34:36	Hobbysta (ornamental fish breeder only)	Since my childhood	Beauty of animals and aquariums	Freshwater	Animal price, Aesthetics of the animal, Origin of the animal, Behavior of the animal, If the animal provides any function inside the aquarium, Ease in caring for the animal	Raised in captivity	Less than 100 R$	Between 10 and 20 fish	8	Yes	Physical shops and petshops	Yes	No	Once every 15 days	Yes	Kept in the aquarium	Yes	I make a donation	No	aquarism forums, Internet searches (google, blogs), Trial and error, Book consultation and specific literature, Consult specialized websites	More fish will be available for trade in the future due to cultivation	On the Internet, With fellow aquarists
478	2019-02-12 19:36:58	Hobbysta (ornamental fish breeder only)	More than 10 years ago	Interest in ecology and biology (development) of animals/challenge in creating an ecosystem	Freshwater	Compatibility with my aquarium and my fauna	Raised in captivity	Less than 100 R$	Between 20 and 50 fish	3	Yes	Physical shops and petshops	Yes	No	Once every 15 days	Yes	Kept in the aquarium	No	I make a donation	No	Trial and error, Book consultation and specific literature, Consult specialized websites	More fish will be available for trade in the future due to cultivation	I treat myself
479	2019-02-12 19:38:26	Hobbysta (ornamental fish breeder only)	More than 10 years ago	Beauty of animals and aquariums	Freshwater	Animal behavior	Raised in captivity	Between 100 and 500 R$	Between 10 and 20 fish	9	No	Physical shops and petshops	Yes	No	Once a week	No	No	Yes	Sell, I make a donation, Trade with other hobbyists for other fish or aquarium equipment	Yes	Internet searches (google, blogs)	More fish will be available for trade in the future due to cultivation	On the Internet, With fellow aquarists
480	2019-02-12 19:39:59	Hobbysta (ornamental fish breeder only)	Between 5 and 10 years	Beauty of animals and aquariums	Freshwater	If the animal provides any function inside the aquarium	Raised in captivity	Less than 100 R$	Between 10 and 20 fish	6	No	Physical shops and petshops	No	No	Once every 15 days	Yes	Kept in the aquarium	Yes	Sell	No	aquarism forums, Internet searches (google, blogs), Trial and error	Fewer fish will be available for trade in the future due to excessive catch and loss of natural habitats	On the Internet, With fellow aquarists
481	2019-02-12 19:43:02	Hobbysta (ornamental fish breeder only)	Since my childhood	Beauty of animals and aquariums	Freshwater	If the animal provides any function inside the aquarium	Raised in captivity	Less than 100 R$	Between 10 and 20 fish	4	No	Physical shops and petshops, Aquarism groups on Facebook, Buy directly from suppliers	No	No	More than once a week	Yes	Kept in the aquarium	No	Trade with other hobbyists for other fish or aquarium equipment	No	Internet searches (google, blogs), External access, Consult specialized websites	More fish will be available for trade in the future due to cultivation	With specialized professionals, With fellow aquarists
482	2019-02-12 19:43:35	Hobbysta (ornamental fish breeder only)	Since my childhood	Beauty of animals and aquariums, Therapy/depression/anxiety/calm	Freshwater	Animal price, Shop/seller recommendation, Aesthetics of the animal, Behavior of the animal, If the animal provides any function inside the aquarium, Ease in caring for the animal	Raised in captivity	Less than 100 R$	Between 10 and 20 fish	4	Yes	Physical shops and petshops	No	No	Once a week	No	No	No	I make a donation	No	aquarism forums, Courses, Trial and error, Consult specialized websites	More fish will be available for trade in the future due to cultivation	With specialized professionals, With fellow aquarists
483	2019-02-12 19:44:52	Hobbysta (ornamental fish breeder only)	More than 10 years ago	Beauty of animals and aquariums	Freshwater	Behavior of the animal, If the animal provides any function inside the aquarium	Raised in captivity	Less than 100 R$	Between 10 and 20 fish	6	No	Physical shops and petshops, Online stores (free market, olx, aquarium store websites)	No	No	Once every 15 days	Yes	Kept in the aquarium, You've given it to another aquarist	Yes	I make a donation, Trade with other hobbyists for other fish or aquarium equipment	No	aquarism forums, Internet searches (google, blogs), Consult specialized websites	Fewer fish will be available for trade in the future due to excessive catch and loss of natural habitats	On the Internet, With fellow aquarists
484	2019-02-12 19:46:19	Hobbysta (ornamental fish breeder only)	Less than 1 year ago	Beauty of animals and aquariums	Freshwater	Aesthetics of the animal	Raised in captivity	Between 100 and 500 R$	Between 10 and 20 fish	6	No	Aquarism groups on Facebook	No	No	Once a month	No	No	Yes	Sell, Trade with other hobbyists for other fish or aquarium equipment	Yes	Internet searches (google, blogs)	More fish will be available for trade in the future due to cultivation	With fellow aquarists
485	2019-02-12 19:49:26	Hobbysta (ornamental fish breeder only)	Less than 1 year ago	Beauty of animals and aquariums	Freshwater	Animal behavior	Raised in captivity	Between 100 and 500 R$	Between 10 and 20 fish	4	No	Physical shops and petshops	No	No	Once a week	Yes	Kept in the aquarium	No	I make a donation	No	aquarism forums, Trial and error, Consult specialized websites	More fish will be available for trade in the future due to cultivation
486	2019-02-12 19:50:10	Hobbysta (ornamental fish breeder only)	Between 5 and 10 years	Beauty of animals and aquariums	Freshwater	Ease in caring for the animal	Raised in captivity	Less than 100 R$	Between 5 and 10 fish	1	No	Physical shops and petshops	No	No	Once every 15 days	Yes	Kept in the aquarium	No	I make a donation	No	Internet searches (google, blogs), Trial and error	More fish will be available for trade in the future due to cultivation	With fellow aquarists
487	2019-02-12 19:51:12	Hobbysta (ornamental fish breeder only)	Between 1 and 5 years	Beauty of animals and aquariums	Freshwater	Animal price, Aesthetics of the animal, Behavior of the animal, If the animal provides any function inside the aquarium	Indifferent	Less than 100 R$	Between 10 and 20 fish	3	No	Physical shops and petshops	No	Yes	Once a week	Yes	You've given it to another aquarist	Yes	I make a donation	No	aquarism forums, Internet searches (google, blogs), Trial and error, Consult specialized websites	More fish will be available for trade in the future due to cultivation	On the Internet, With fellow aquarists, With specialized professionals
488	2019-02-12 19:52:56	Hobbysta (ornamental fish breeder only)	Since my childhood	Interest in ecology and biology (development) of animals/challenge in creating an ecosystem	Freshwater	Compatibility with my aquarium and my fauna	Raised in captivity	Between 100 and 500 R$	more than a thousand	5	Yes	Buy directly from suppliers	Yes	No	Once a week	Yes	Kept in the aquarium, Sold, You've given it to another aquarist	Yes	I make a donation	Yes	Internet searches (google, blogs), Trial and error, Book consultation and specific literature	Fewer fish will be available for trade in the future due to excessive catch and loss of natural habitats	With specialized professionals, On the Internet, With fellow aquarists
489	2019-02-12 19:53:02	Hobbysta (ornamental fish breeder only)	Between 1 and 5 years	Beauty of animals and aquariums	Freshwater	Aesthetics of the animal	Raised in captivity	Between 100 and 500 R$	Between 10 and 20 fish	5	No	Physical shops and petshops	No	No	Once a week	Yes	You've given it to another aquarist, Swapped with another aquarist for another fish	No	I make a donation, Trade with other hobbyists for other fish or aquarium equipment	No	aquarism forums, Internet searches (google, blogs), Trial and error, Book consultation and specific literature, Consult specialized websites	More fish will be available for trade in the future due to cultivation	With specialized professionals, On the Internet, With fellow aquarists
490	2019-02-12 19:53:15	Hobbysta (ornamental fish breeder only)	More than 10 years ago	Beauty of animals and aquariums	Freshwater	Animal price, Shop/seller recommendation, Aesthetics of the animal	Raised in captivity	Less than 100 R$	Between 10 and 20 fish	5	No	Physical shops and petshops	No	No	Once a week	No	No	Yes	Release in nature	Yes	aquarism forums, Internet searches (google, blogs), Trial and error, Consult specialized websites	More fish will be available for trade in the future due to cultivation	On the Internet
491	2019-02-12 19:57:02	Hobbysta (ornamental fish breeder only)	Between 1 and 5 years	Beauty of animals and aquariums	Freshwater	Aesthetics of the animal	Raised in captivity	Less than 100 R$	Less than 5 fish	1	No	Physical shops and petshops	No	No	Once a month	No	No	Yes	I make a donation	No	aquarism forums, Internet searches (google, blogs), Trial and error	More fish will be available for trade in the future due to cultivation	On the Internet
492	2019-02-12 19:57:05	Hobbysta (ornamental fish breeder only)	More than 10 years ago	Therapy/depression/anxiety/calm	The two options	Animal behavior	Raised in captivity	Between 100 and 500 R$	Between 10 and 20 fish	6	No	Physical shops and petshops	No	No	Once a week	No	Kept in the aquarium	Yes	I make a donation	No	aquarism forums, Courses, Internet searches (google, blogs)	More fish will be available for trade in the future due to cultivation	With specialized professionals, On the Internet, With fellow aquarists
493	2019-02-12 19:57:34	Hobbysta (ornamental fish breeder only)	More than 10 years ago	Commercial interest - in addition to creating, you sell ornamental fish	The two options	Animal price, Shop/seller recommendation, Aesthetics of the animal, Origin of the animal	Raised in captivity	Between 100 and 500 R$	Between 20 and 50 fish	3	No	Buy directly from suppliers	Yes	No	Once a week	Yes	Sold	Yes	Trade with other hobbyists for other fish or aquarium equipment	No	Book consultation and specific literature	More fish will be available for trade in the future due to cultivation	On the Internet
494	2019-02-12 19:58:28	Hobbysta (ornamental fish breeder only)	Less than 1 year ago	Beauty of animals and aquariums	Freshwater	Animal price, Aesthetics of the animal	Raised in captivity	Less than 100 R$	Between 20 and 50 fish	1	No	Physical shops and petshops	No	Yes	Once every 15 days	No	You've given it to another aquarist	No	I make a donation	No	aquarism forums	Fewer fish will be available for trade in the future due to excessive catch and loss of natural habitats	With specialized professionals, On the Internet, With fellow aquarists
495	2019-02-12 19:59:46	Hobbysta (ornamental fish breeder only)	Since my childhood	Beauty of animals and aquariums	Freshwater	Animal behavior	Raised in captivity	Less than 100 R$	Between 20 and 50 fish	9	Yes	Physical shops and petshops, Buy directly from suppliers	No	No	Once a month	Yes	Kept in the aquarium	Yes	Trade with other hobbyists for other fish or aquarium equipment	No	Trial and error	Fewer fish will be available for trade in the future due to excessive catch and loss of natural habitats	With fellow aquarists
496	2019-02-12 20:06:16	Hobbysta (ornamental fish breeder only)	Between 1 and 5 years	Beauty of animals and aquariums	Freshwater	Shop/seller recommendation	Raised in captivity	Less than 100 R$	Between 10 and 20 fish	5	Yes	Physical shops and petshops	No	No	Once a month	Yes	Kept in the aquarium	Yes	I make a donation	No	aquarism forums, Internet searches (google, blogs), Consult specialized websites	More fish will be available for trade in the future due to cultivation	With specialized professionals
497	2019-02-12 20:06:43	Hobbysta (ornamental fish breeder only)	Between 1 and 5 years	Beauty of animals and aquariums	Freshwater	Behavior of the animal, If the animal provides any function inside the aquarium	Raised in captivity	Less than 100 R$	Between 10 and 20 fish	9	No	Physical shops and petshops, Aquarism groups on Facebook	Yes	No	Once every 15 days	No	No	Yes	Sell, Trade with other hobbyists for other fish or aquarium equipment	No	Internet searches (google, blogs), Trial and error	More fish will be available for trade in the future due to cultivation	On the Internet, With fellow aquarists
498	2019-02-12 20:12:16	Hobbysta (ornamental fish breeder only)	Between 1 and 5 years	Beauty of animals and aquariums	Freshwater	Animal behavior	Raised in captivity	Less than 100 R$	Between 10 and 20 fish	4	No	Physical shops and petshops	Yes	No	Once a week	Yes	Kept in the aquarium	Yes	Sell	No	Internet searches (google, blogs), External access, Book consultation and specific literature	Fewer fish will be available for trade in the future due to excessive catch and loss of natural habitats	With specialized professionals, With fellow aquarists
499	2019-02-12 20:13:19	Hobbysta (ornamental fish breeder only)	Between 1 and 5 years	Behavior - are easy animals to care for, do not make noise	Freshwater	Animal price, Aesthetics of the animal, Behavior of the animal, If the animal provides any function inside the aquarium, Ease in caring for the animal	Raised in captivity	Less than 100 R$	Between 10 and 20 fish	5	No	Physical shops and petshops	No	No	Once every 15 days	No	Kept in the aquarium	Yes	I make a donation	No	aquarism forums, Internet searches (google, blogs), Trial and error	More fish will be available for trade in the future due to cultivation	With fellow aquarists
500	2019-02-12 20:15:56	Hobbysta (ornamental fish breeder only)	Since my childhood	Beauty of animals and aquariums	Freshwater	Compatibility with my aquarium and my fauna	Raised in captivity	Less than 100 R$	Between 20 and 50 fish	6	No	Physical shops and petshops	No	No	Once a week	Yes	Kept in the aquarium	Yes	Trade with other hobbyists for other fish or aquarium equipment	No	Trial and error	Fewer fish will be available for trade in the future due to excessive catch and loss of natural habitats	With fellow aquarists
501	2019-02-12 20:23:26	Hobbysta (ornamental fish breeder only)	More than 10 years ago	Beauty of animals and aquariums	Freshwater	Aesthetics of the animal, Origin of the animal, Animal behavior	Wild caught in nature	Less than 100 R$	Between 5 and 10 fish	17	Yes	Physical shops and petshops	No	No	Once every 15 days	Yes	Kept in the aquarium	Yes	I make a donation	No	aquarism forums, Internet searches (google, blogs), Trial and error, Book consultation and specific literature, Consult specialized websites	More fish will be available for trade in the future due to cultivation	On the Internet
502	2019-02-12 20:28:32	Hobbysta (ornamental fish breeder only)	Between 1 and 5 years	Beauty of animals and aquariums	Freshwater	Origin of the animal, Behavior of the animal, If the animal provides any function inside the aquarium	Raised in captivity	Between 100 and 500 R$	Between 20 and 50 fish	3	No	Physical shops and petshops	Yes	No	Once every 15 days	Yes	Kept in the aquarium, You've given it to another aquarist	No	I make a donation	No	aquarism forums, Internet searches (google, blogs), Trial and error, Book consultation and specific literature, Consult specialized websites	Fewer fish will be available for trade in the future due to excessive catch and loss of natural habitats	With specialized professionals, On the Internet
503	2019-02-12 20:31:06	Hobbysta (ornamental fish breeder only)	More than 10 years ago	Beauty of animals and aquariums	The two options	Aesthetics of the animal, Origin of the animal, Behavior of the animal, If the animal provides any function inside the aquarium	Raised in captivity	Between 100 and 500 R$	Between 20 and 50 fish	5	Yes	Physical shops and petshops, Buy directly from suppliers	No	No	Once every 15 days	Yes	Kept in the aquarium	Yes	I make a donation	No	aquarism forums, Internet searches (google, blogs), External access, Trial and error, Consult specialized websites	Fewer fish will be available for trade in the future due to excessive catch and loss of natural habitats	On the Internet
504	2019-02-12 20:34:18	Hobbysta (ornamental fish breeder only)	More than 10 years ago	Beauty of animals and aquariums	Freshwater	Animal price, Origin of the animal	Raised in captivity	More than 2 thousand R$	Between 20 and 50 fish	3	No	Buy directly from suppliers	Yes	No	More than once a week	Yes	Kept in the aquarium, Sold, You've given it to another aquarist, Swapped with another aquarist for another fish	No	Sell, I make a donation	No	Courses, Trial and error, Book consultation and specific literature, Inicio do mestrado na UNESP (faculdade)	More fish will be available for trade in the future due to cultivation	With specialized professionals
505	2019-02-12 20:34:37	Hobbysta (ornamental fish breeder only)	Between 1 and 5 years	Beauty of animals and aquariums	Freshwater	Animal behavior	Raised in captivity	Less than 100 R$	Between 10 and 20 fish	5	No	Physical shops and petshops	No	No	Once a week	No	No	Yes	I never fell apart	No	aquarism forums, Internet searches (google, blogs)	Fewer fish will be available for trade in the future due to excessive catch and loss of natural habitats	With specialized professionals
506	2019-02-12 20:36:11	Hobbysta and Seller	More than 10 years ago	Beauty of animals and aquariums	Freshwater	Animal price	Raised in captivity	Less than 100 R$	Between 20 and 50 fish	5	Yes	Physical shops and petshops	No	No	Once a month	Yes	Sold	Yes	Sell	No	aquarism forums, Internet searches (google, blogs), Consult specialized websites	More fish will be available for trade in the future due to cultivation	On the Internet
507	2019-02-12 20:36:39	Hobbysta (ornamental fish breeder only)	Since my childhood	Commercial interest - in addition to creating, you sell ornamental fish, Beauty of animals and aquariums	Freshwater	Origin of the animal, Animal behavior	Raised in captivity	Between 100 and 500 R$	Between 20 and 50 fish	6	Yes	Physical shops and petshops, Online stores (free market, olx, aquarium store websites), Aquarism groups on Facebook	Yes	No	Once a week	Yes	Kept in the aquarium, Sold, You've given it to another aquarist, Swapped with another aquarist for another fish	Yes	I make a donation, Trade with other hobbyists for other fish or aquarium equipment	No	aquarism forums, Trial and error, Book consultation and specific literature, Consult specialized websites, Na faculdade de Medicina Veterinária	Fewer fish will be available for trade in the future due to excessive catch and loss of natural habitats	I treat myself
508	2019-02-12 20:37:04	Hobbysta (ornamental fish breeder only)	Between 5 and 10 years	Beauty of animals and aquariums	Freshwater	Aesthetics of the animal, Origin of the animal, Animal behavior	Raised in captivity	Between 100 and 500 R$	Between 10 and 20 fish	9	No	Physical shops and petshops	Yes	No	Once a week	Yes	Sold, You've given it to another aquarist	Yes	I make a donation	No	aquarism forums, Internet searches (google, blogs)	Fewer fish will be available for trade in the future due to excessive catch and loss of natural habitats	With fellow aquarists
509	2019-02-12 20:39:45	Hobbysta (ornamental fish breeder only)	Since my childhood	Beauty of animals and aquariums	Freshwater	Behavior of the animal, If the animal provides any function inside the aquarium	Raised in captivity	Between 100 and 500 R$	Between 20 and 50 fish	16	Yes	Physical shops and petshops, Capture in nature (lakes, rivers, ocean)	No	Yes	Once a week	Yes	You've given it to another aquarist	Yes	I make a donation	No	aquarism forums, Internet searches (google, blogs), Trial and error, Book consultation and specific literature, Consult specialized websites	More fish will be available for trade in the future due to cultivation	With specialized professionals, On the Internet, With fellow aquarists
510	2019-02-12 20:42:55	Hobbysta (ornamental fish breeder only)	Since my childhood	Beauty of animals and aquariums	Freshwater	Origin of the animal	Raised in captivity	Less than 100 R$	Between 10 and 20 fish	2	No	Buy directly from suppliers	No	No	Once a month	No	You've given it to another aquarist	No	Sell, I make a donation	No	aquarism forums, Consult specialized websites	More fish will be available for trade in the future due to cultivation	On the Internet
511	2019-02-12 20:44:34	Hobbysta (ornamental fish breeder only)	Less than 1 year ago	Beauty of animals and aquariums, Behavior - are easy animals to care for, do not make noise	Freshwater	Animal behavior	Raised in captivity	Between 100 and 500 R$	Between 20 and 50 fish	3	Yes	Physical shops and petshops	No	No	Once a week	Yes	Kept in the aquarium	Yes	I make a donation	No	aquarism forums, Internet searches (google, blogs), Trial and error, Consult specialized websites	More fish will be available for trade in the future due to cultivation	On the Internet
512	2019-02-12 20:46:21	Hobbysta and Seller	Between 1 and 5 years	Beauty of animals and aquariums	Freshwater	Animal behavior	Raised in captivity	Less than 100 R$	Less than 5 fish	1	Yes	Physical shops and petshops	No	No	Once a month	Yes	Kept in the aquarium	Yes	I make a donation	No	Trabalho em uma loja de aquariano	More fish will be available for trade in the future due to cultivation	With specialized professionals
513	2019-02-12 20:48:32	Hobbysta (ornamental fish breeder only)	Between 5 and 10 years	Beauty of animals and aquariums	Freshwater	If the animal provides any function inside the aquarium	Raised in captivity	Less than 100 R$	Between 10 and 20 fish	7	Yes	Physical shops and petshops	No	No	As needed	No	No	Yes	Sell	No	não me considero com experiência, vc deve prever isso... Na verdade não concordo com nenhuma das informações abaixo, mas como são obrigatórias tive que marcar	More fish will be available for trade in the future due to cultivation	On the Internet
514	2019-02-12 20:49:12	Hobbysta (ornamental fish breeder only)	Less than 1 year ago	Beauty of animals and aquariums	Freshwater	Animal price, Aesthetics of the animal, If the animal provides any function inside the aquarium	Raised in captivity	Less than 100 R$	Between 5 and 10 fish	2	Yes	Physical shops and petshops	No	No	Once a month	No	No	No	I never fell apart	No	Trial and error	Fewer fish will be available for trade in the future due to excessive catch and loss of natural habitats	On the Internet
515	2019-02-12 20:51:24	Hobbysta (ornamental fish breeder only)	Between 5 and 10 years	Beauty of animals and aquariums	Freshwater	Origin of the animal, Behavior of the animal, If the animal provides any function inside the aquarium, Ease in caring for the animal, animal health	Raised in captivity	Less than 100 R$	Between 10 and 20 fish	8	Yes	Physical shops and petshops, Buy directly from suppliers	No	No	Once a week	Yes	Kept in the aquarium	Yes	I make a donation, Trade with other hobbyists for other fish or aquarium equipment	No	aquarism forums, Internet searches (google, blogs)	Fewer fish will be available for trade in the future due to excessive catch and loss of natural habitats	On the Internet, With fellow aquarists
516	2019-02-12 20:55:37	Hobbysta (ornamental fish breeder only)	Between 5 and 10 years	Beauty of animals and aquariums, Behavior - are easy animals to care for, do not make noise	Freshwater	Aesthetics of the animal, Ease in caring for the animal	Raised in captivity	Less than 100 R$	Less than 5 fish	2	No	Physical shops and petshops	No	No	Once a month	No	No	No	I make a donation	No	aquarism forums, Internet searches (google, blogs), Trial and error, Consult specialized websites	More fish will be available for trade in the future due to cultivation	On the Internet, With fellow aquarists
517	2019-02-12 20:56:16	Hobbysta (ornamental fish breeder only)	Between 5 and 10 years	Beauty of animals and aquariums, Encouragement, recommendation or inheritance of friends or family	Freshwater	Aesthetics of the animal, Origin of the animal, Animal behavior, Ease in caring for the animal	Raised in captivity	Between 100 and 500 R$	Between 20 and 50 fish	3	No	Physical shops and petshops, Online stores (free market, olx, aquarium store websites)	No	No	Once a week	Yes	Kept in the aquarium, Swapped with another aquarist for another fish	Yes	Trade with other hobbyists for other fish or aquarium equipment	No	Internet searches (google, blogs), Trial and error	More fish will be available for trade in the future due to cultivation	With specialized professionals, With fellow aquarists
518	2019-02-12 20:56:57	Hobbysta (ornamental fish breeder only)	More than 10 years ago	Beauty of animals and aquariums	Freshwater	Animal price, Aesthetics of the animal, If the animal provides any function inside the aquarium	Raised in captivity	Between 100 and 500 R$	Between 10 and 20 fish	6	No	Physical shops and petshops	No	No	Once a month	Yes	Kept in the aquarium	No	I make a donation, Trade with other hobbyists for other fish or aquarium equipment	No	aquarism forums, Internet searches (google, blogs), External access, Consult specialized websites	Fewer fish will be available for trade in the future due to excessive catch and loss of natural habitats	With fellow aquarists
519	2019-02-12 20:57:39	Hobbysta (ornamental fish breeder only)	Since my childhood	Beauty of animals and aquariums	Freshwater	Animal behavior	Raised in captivity	Between 100 and 500 R$	Between 10 and 20 fish	6	No	Physical shops and petshops	No	No	More than once a week	Yes	Kept in the aquarium	Yes	I make a donation	No	Internet searches (google, blogs)	More fish will be available for trade in the future due to cultivation	With fellow aquarists
520	2019-02-12 20:57:42	Hobbysta (ornamental fish breeder only)	More than 10 years ago	Beauty of animals and aquariums	Freshwater	Aesthetics of the animal, Animal behavior	Raised in captivity	Less than 100 R$	Between 20 and 50 fish	7	No	Physical shops and petshops, Aquarism groups on Facebook	No	No	Once a week	No	No	Yes	Sell, I make a donation	No	aquarism forums, Internet searches (google, blogs), Book consultation and specific literature, Consult specialized websites	More fish will be available for trade in the future due to cultivation	On the Internet, With fellow aquarists
521	2019-02-12 20:58:46	Hobbysta (ornamental fish breeder only)	Between 1 and 5 years	Beauty of animals and aquariums	Freshwater	I buy the animals that are not sold easily	Raised in captivity	Less than 100 R$	Between 20 and 50 fish	7	No	Physical shops and petshops	No	No	Once every 15 days	Yes	Kept in the aquarium, You've given it to another aquarist	Yes	I make a donation, Trade with other hobbyists for other fish or aquarium equipment	No	aquarism forums, Internet searches (google, blogs), Trial and error, Consult specialized websites	Fewer fish will be available for trade in the future due to excessive catch and loss of natural habitats	On the Internet, With fellow aquarists
522	2019-02-12 20:59:41	Hobbysta (ornamental fish breeder only)	Since my childhood	Beauty of animals and aquariums	Freshwater	Animal behavior	Raised in captivity	Less than 100 R$	Between 5 and 10 fish	4	No	Physical shops and petshops	No		Once a month	Yes	Kept in the aquarium	Yes	I never fell apart	No	aquarism forums, Internet searches (google, blogs), Book consultation and specific literature, Consult specialized websites	More fish will be available for trade in the future due to cultivation	On the Internet, With fellow aquarists
523	2019-02-12 20:59:51	Hobbysta (ornamental fish breeder only)	Less than 1 year ago	Beauty of animals and aquariums	Freshwater	Animal behavior	Raised in captivity	Less than 100 R$	Between 20 and 50 fish	6	Yes	Physical shops and petshops	Yes	Yes	Once every 15 days	Yes	Kept in the aquarium, You've given it to another aquarist	Yes	I make a donation	No	aquarism forums, Courses, Internet searches (google, blogs), Consult specialized websites	Fewer fish will be available for trade in the future due to excessive catch and loss of natural habitats
524	2019-02-12 21:00:02	Hobbysta (ornamental fish breeder only)	Since my childhood	Beauty of animals and aquariums	Freshwater	Animal price, Shop/seller recommendation, Aesthetics of the animal, Origin of the animal, Behavior of the animal, If the animal provides any function inside the aquarium, Ease in caring for the animal	Raised in captivity	Between 100 and 500 R$	Between 20 and 50 fish	13	Yes	Physical shops and petshops, Buy directly from suppliers	Yes	No	Once a week	Yes	Kept in the aquarium	Yes	I make a donation	Yes	aquarism forums, Internet searches (google, blogs), Trial and error, Book consultation and specific literature	More fish will be available for trade in the future due to cultivation	On the Internet, With fellow aquarists
525	2019-02-12 21:05:57	Hobbysta (ornamental fish breeder only)	Between 1 and 5 years	Beauty of animals and aquariums	Freshwater	Animal behavior	Raised in captivity	Less than 100 R$	Between 20 and 50 fish	6	No	Physical shops and petshops	No	No	Once a week	Yes	Swapped with another aquarist for another fish	Yes	Sell, I make a donation, Trade with other hobbyists for other fish or aquarium equipment	No	aquarism forums, Internet searches (google, blogs), Trial and error	More fish will be available for trade in the future due to cultivation	On the Internet, With fellow aquarists
526	2019-02-12 21:06:30	Hobbysta and Seller	Between 1 and 5 years	Beauty of animals and aquariums	Freshwater	Aesthetics of the animal, Origin of the animal	Raised in captivity	Between 100 and 500 R$	Less than 5 fish	1	No	Physical shops and petshops	No	No	Once a month	No	Kept in the aquarium	No	I make a donation	No	External access, Trial and error, Trabalho em loja especializada.	More fish will be available for trade in the future due to cultivation	With specialized professionals
527	2019-02-12 21:08:37	Hobbysta and Seller	Between 1 and 5 years	Commercial interest - in addition to creating, you sell ornamental fish, Beauty of animals and aquariums, Encouragement, recommendation or inheritance of friends or family, Behavior - are easy animals to care for, do not make noise	The two options	Animal price, Shop/seller recommendation, Origin of the animal, Animal behavior	Raised in captivity	I don't know	Less than 5 fish	3	No	Physical shops and petshops	Yes	No	Once a month	Yes	Sold, You've given it to another aquarist, Swapped with another aquarist for another fish	Yes	I make a donation, Trade with other hobbyists for other fish or aquarium equipment	No	Internet searches (google, blogs), External access, Trial and error, Book consultation and specific literature, Consult specialized websites	More fish will be available for trade in the future due to cultivation	With specialized professionals, With fellow aquarists
528	2019-02-12 21:10:16	Hobbysta (ornamental fish breeder only)	Less than 1 year ago	Beauty of animals and aquariums	Freshwater	Animal behavior	Raised in captivity	Between 100 and 500 R$	Between 20 and 50 fish	4	No	Physical shops and petshops	Yes	No	Once a week	Yes	Kept in the aquarium, You've given it to another aquarist	Yes	I make a donation	No	aquarism forums, Internet searches (google, blogs), Consult specialized websites	Fewer fish will be available for trade in the future due to excessive catch and loss of natural habitats	On the Internet
529	2019-02-12 21:10:50	Hobbysta (ornamental fish breeder only)	Between 5 and 10 years	Beauty of animals and aquariums	Freshwater	Animal behavior	Indifferent	Less than 100 R$	Between 5 and 10 fish	3	No	Physical shops and petshops, Aquarism groups on Facebook, Buy directly from suppliers, Capture in nature (lakes, rivers, ocean)	No	No	Once a week	Yes	You've given it to another aquarist, Swapped with another aquarist for another fish	Yes	I make a donation, Trade with other hobbyists for other fish or aquarium equipment	No	aquarism forums, Internet searches (google, blogs), Trial and error, Book consultation and specific literature, Consult specialized websites	More fish will be available for trade in the future due to cultivation	With fellow aquarists
530	2019-02-12 21:11:21	Hobbysta (ornamental fish breeder only)	Less than 1 year ago	Beauty of animals and aquariums	Freshwater	Origin of the animal, Comprotamento do animal, Compatibility with my aquarium and my fauna	Raised in captivity	Less than 100 R$	Less than 5 fish	1	No	Physical shops and petshops	No	No	Once every 15 days	No	No	No	Sell, I make a donation	No	aquarism forums, Internet searches (google, blogs), Local de trabalho e amigos aquaristas	Fewer fish will be available for trade in the future due to excessive catch and loss of natural habitats	With specialized professionals, On the Internet, With fellow aquarists
531	2019-02-12 21:11:59	Hobbysta (ornamental fish breeder only)	Since my childhood	Beauty of animals and aquariums	Freshwater	Aesthetics of the animal, Origin of the animal	Raised in captivity	Between 100 and 500 R$	Between 5 and 10 fish	4	No	Physical shops and petshops, Online stores (free market, olx, aquarium store websites)	No	Yes	Once a week	No	No	Yes	I make a donation, Trade with other hobbyists for other fish or aquarium equipment	No	aquarism forums, Internet searches (google, blogs)	Fewer fish will be available for trade in the future due to excessive catch and loss of natural habitats	With specialized professionals, On the Internet, With fellow aquarists
532	2019-02-12 21:13:25	Hobbysta (ornamental fish breeder only)	Less than 1 year ago	Beauty of animals and aquariums	Freshwater	Aesthetics of the animal, Origin of the animal, Behavior of the animal, If the animal provides any function inside the aquarium, Compatibility with my aquarium and my fauna	Raised in captivity	Less than 100 R$	Between 5 and 10 fish	3	No	Physical shops and petshops	No	No	Once a week	Yes	Kept in the aquarium	No	I make a donation	No	aquarism forums, Internet searches (google, blogs), Trial and error, Book consultation and specific literature, Consult specialized websites	More fish will be available for trade in the future due to cultivation	On the Internet, With fellow aquarists
533	2019-02-12 21:13:42	Hobbysta (ornamental fish breeder only)	Less than 1 year ago	Beauty of animals and aquariums, Encouragement, recommendation or inheritance of friends or family	Freshwater	Animal price, Shop/seller recommendation, Aesthetics of the animal, Animal behavior	Raised in captivity	Less than 100 R$	Between 10 and 20 fish	10	No	Physical shops and petshops	No	No	Once every 15 days	Yes	Kept in the aquarium	No	Trade with other hobbyists for other fish or aquarium equipment	No	aquarism forums, Internet searches (google, blogs), Trial and error	Fewer fish will be available for trade in the future due to excessive catch and loss of natural habitats	On the Internet, With fellow aquarists
534	2019-02-12 21:14:58	Hobbysta and Seller	Between 5 and 10 years	Beauty of animals and aquariums	The two options	Animal behavior	Raised in captivity	Less than 100 R$	Between 5 and 10 fish	5	Yes	Physical shops and petshops	Yes	No	Once a month	Yes	Kept in the aquarium	Yes	I make a donation	No	Internet searches (google, blogs), Depois tive mais conhecimento no meu trabalho que é numa loja de aquários	More fish will be available for trade in the future due to cultivation	With specialized professionals
535	2019-02-12 21:18:02	Hobbysta (ornamental fish breeder only)	Less than 1 year ago	Beauty of animals and aquariums	Freshwater	Animal price, Aesthetics of the animal	Raised in captivity	Less than 100 R$	Between 20 and 50 fish	4	No	Physical shops and petshops	Yes	No	Every 3 months	Yes	Kept in the aquarium	No	I make a donation, Trade with other hobbyists for other fish or aquarium equipment	No	aquarism forums, Internet searches (google, blogs), Trial and error, Consult specialized websites	More fish will be available for trade in the future due to cultivation	On the Internet
536	2019-02-12 21:34:45	Hobbysta (ornamental fish breeder only)	Less than 1 year ago	Beauty of animals and aquariums	Freshwater	Animal behavior	Raised in captivity	Between 100 and 500 R$	Between 5 and 10 fish	6	Yes	Physical shops and petshops	No	No	Once a week	No	You've given it to another aquarist	No	I make a donation	No	Internet searches (google, blogs), Trial and error, Consult specialized websites	More fish will be available for trade in the future due to cultivation	On the Internet, With fellow aquarists
537	2019-02-12 21:36:53	Hobbysta (ornamental fish breeder only)	Since my childhood	Beauty of animals and aquariums, Behavior - are easy animals to care for, do not make noise	Freshwater	Compatibility with my aquarium and my fauna	Raised in captivity	Less than 100 R$	Less than 5 fish	2	Yes	Physical shops and petshops	Yes	No	Once every 15 days	No	No	No	Release in nature	No	aquarism forums, Internet searches (google, blogs)	More fish will be available for trade in the future due to cultivation	On the Internet, With fellow aquarists
538	2019-02-12 21:48:02	Hobbysta (ornamental fish breeder only)	More than 10 years ago	Beauty of animals and aquariums	Freshwater	Animal price, Aesthetics of the animal, Origin of the animal, Animal behavior, Ease in caring for the animal	Raised in captivity	Between 100 and 500 R$	Between 20 and 50 fish	18	No	Physical shops and petshops	No	No	Once a week	Yes	You've given it to another aquarist	Yes	Sell, I make a donation, Trade with other hobbyists for other fish or aquarium equipment	No	aquarism forums, Internet searches (google, blogs), Trial and error, Book consultation and specific literature, Consult specialized websites	Fewer fish will be available for trade in the future due to excessive catch and loss of natural habitats	On the Internet, With fellow aquarists
539	2019-02-12 21:48:54	Hobbysta (ornamental fish breeder only)	Between 1 and 5 years	Beauty of animals and aquariums	Freshwater	Animal behavior, Compatibility with my aquarium and my fauna	Raised in captivity	Less than 100 R$	Between 10 and 20 fish	6	No	Physical shops and petshops	No	No	More than once a week	No	No	Yes	I make a donation	No	aquarism forums, Internet searches (google, blogs), Trial and error	Fewer fish will be available for trade in the future due to excessive catch and loss of natural habitats	On the Internet, With fellow aquarists
540	2019-02-12 21:50:53	Hobbysta (ornamental fish breeder only)	More than 10 years ago	Beauty of animals and aquariums	Freshwater	Aesthetics of the animal, Animal behavior, Ease in caring for the animal	Raised in captivity	Less than 100 R$	Between 20 and 50 fish	6	Yes	Physical shops and petshops, Aquarism groups on Facebook	No	No	Once a month	Yes	Kept in the aquarium, You've given it to another aquarist, Swapped with another aquarist for another fish	Yes	Sell, I make a donation, Trade with other hobbyists for other fish or aquarium equipment	No	aquarism forums, Internet searches (google, blogs), Trial and error	More fish will be available for trade in the future due to cultivation	On the Internet, With fellow aquarists
541	2019-02-12 21:53:38	Hobbysta (ornamental fish breeder only)	Less than 1 year ago	Beauty of animals and aquariums	Freshwater	Aesthetics of the animal, Behavior of the animal, If the animal provides any function inside the aquarium	Raised in captivity	Between 100 and 500 R$	Between 20 and 50 fish	11	No	Physical shops and petshops	No	No	Once a week	No	No	Yes	I never fell apart	No	aquarism forums, Internet searches (google, blogs), Trial and error, Book consultation and specific literature, Consult specialized websites	More fish will be available for trade in the future due to cultivation	On the Internet, With fellow aquarists
542	2019-02-12 21:54:34	Hobbysta (ornamental fish breeder only)	Between 1 and 5 years	Beauty of animals and aquariums	Freshwater	Aesthetics of the animal	Raised in captivity	Between 100 and 500 R$	Between 20 and 50 fish	12	No	Physical shops and petshops	No	No	Once every 15 days	Yes	Kept in the aquarium	Yes	I never fell apart	No	aquarism forums, Consult specialized websites	Fewer fish will be available for trade in the future due to excessive catch and loss of natural habitats	On the Internet
543	2019-02-12 22:00:29	Hobbysta (ornamental fish breeder only)	Between 1 and 5 years	Beauty of animals and aquariums	Freshwater	Origin of the animal	Raised in captivity	Between 100 and 500 R$	Between 20 and 50 fish	3	No	Online stores (free market, olx, aquarium store websites)	Yes	No	Once a week	Yes	Kept in the aquarium	Yes	I make a donation	No	Trial and error	More fish will be available for trade in the future due to cultivation	On the Internet, With fellow aquarists
544	2019-02-12 22:07:12	Hobbysta (ornamental fish breeder only)	More than 10 years ago	Beauty of animals and aquariums	Freshwater	Animal behavior, Compatibility with my aquarium and my fauna	Wild caught in nature	Less than 100 R$	Between 10 and 20 fish	3	Yes	Physical shops and petshops, Buy directly from suppliers	Yes	Yes	Once every 15 days	Yes	You've given it to another aquarist, Swapped with another aquarist for another fish, troca por equipamentos e alimentação dos meus... em lojas de aquarios	Yes	I make a donation, Trade with other hobbyists for other fish or aquarium equipment	No	Trial and error	Fewer fish will be available for trade in the future due to excessive catch and loss of natural habitats	With specialized professionals, I treat myself
545	2019-02-12 22:09:10	Hobbysta (ornamental fish breeder only)	Since my childhood	Beauty of animals and aquariums	Freshwater	Aesthetics of the animal, Origin of the animal, Animal behavior	Raised in captivity	Between 100 and 500 R$	Between 20 and 50 fish	6	Yes	Physical shops and petshops	No	No	Once a month	Yes	Kept in the aquarium	Yes	I make a donation	No	aquarism forums, Internet searches (google, blogs), External access, Trial and error, Book consultation and specific literature, Consult specialized websites	More fish will be available for trade in the future due to cultivation	With fellow aquarists
546	2019-02-12 22:10:16	Hobbysta (ornamental fish breeder only)	Since my childhood	Beauty of animals and aquariums	Freshwater	Animal behavior	Raised in captivity	Less than 100 R$	Between 5 and 10 fish	3	No	Physical shops and petshops	No	No	Once every 15 days	Yes	Kept in the aquarium	Yes	I make a donation	No	aquarism forums, Internet searches (google, blogs), Trial and error, Consult specialized websites	Fewer fish will be available for trade in the future due to excessive catch and loss of natural habitats	On the Internet, With fellow aquarists
547	2019-02-12 22:12:03	Hobbysta (ornamental fish breeder only)	Between 1 and 5 years	Encouragement, recommendation or inheritance of friends or family	Freshwater	Aesthetics of the animal	Raised in captivity	Less than 100 R$	Between 5 and 10 fish	3	No	Physical shops and petshops	Yes	No	Once a week	No	No	Yes	I make a donation	No	Internet searches (google, blogs)	More fish will be available for trade in the future due to cultivation	On the Internet
548	2019-02-12 22:12:57	Hobbysta (ornamental fish breeder only)	Between 1 and 5 years	Beauty of animals and aquariums	Freshwater	Aesthetics of the animal	Raised in captivity	Between 500 and 1,000 R$	Between 20 and 50 fish	23	No	Physical shops and petshops	No	No	Once a week	No	No	Yes	Trade with other hobbyists for other fish or aquarium equipment	No	Internet searches (google, blogs), Consult specialized websites	More fish will be available for trade in the future due to cultivation	On the Internet, With fellow aquarists
549	2019-02-12 22:21:40	Hobbysta (ornamental fish breeder only)	Between 1 and 5 years	Beauty of animals and aquariums	Freshwater	Aesthetics of the animal, Animal behavior	Raised in captivity	Between 100 and 500 R$	Between 10 and 20 fish	10	No	Physical shops and petshops, Buy directly from suppliers	Yes	No	Once a week	No	No	Yes	I make a donation	No	aquarism forums, Internet searches (google, blogs), Trial and error	More fish will be available for trade in the future due to cultivation	With fellow aquarists
550	2019-02-12 22:24:26	Hobbysta (ornamental fish breeder only)	Between 5 and 10 years	Beauty of animals and aquariums	Freshwater	Compatibility with my aquarium and my fauna	Raised in captivity	Less than 100 R$	Between 5 and 10 fish	2	Yes	Physical shops and petshops	Yes	No	Once a month	Yes	Kept in the aquarium, You've given it to another aquarist	Yes	I make a donation, Trade with other hobbyists for other fish or aquarium equipment	No	aquarism forums, Internet searches (google, blogs), Trial and error, Consult specialized websites	Fewer fish will be available for trade in the future due to excessive catch and loss of natural habitats	With specialized professionals, On the Internet, With fellow aquarists
551	2019-02-12 22:26:49	Hobbysta (ornamental fish breeder only)	Between 5 and 10 years	Beauty of animals and aquariums	Freshwater	Aesthetics of the animal, If the animal provides any function inside the aquarium, Ease in caring for the animal	Raised in captivity	Between 100 and 500 R$	Between 20 and 50 fish	1	No	Physical shops and petshops, Buy directly from suppliers	No	No	Once a week	Yes	You've given it to another aquarist	No	Sell, I make a donation	No	aquarism forums, Trial and error	Fewer fish will be available for trade in the future due to excessive catch and loss of natural habitats	With fellow aquarists
552	2019-02-12 22:27:38	Hobbysta (ornamental fish breeder only)	Between 5 and 10 years	Beauty of animals and aquariums, Pesquisa	Freshwater	Animal price, Shop/seller recommendation, Aesthetics of the animal, Origin of the animal, Behavior of the animal, If the animal provides any function inside the aquarium, Ease in caring for the animal	Faço biologia, então tenho autorização para capturar peixes para fins científicos	Less than 100 R$	Between 10 and 20 fish	5	Yes	Physical shops and petshops	No	No	Once a week	Yes	Kept in the aquarium, You've given it to another aquarist, Realizei em partes minha pesquisa	Yes	I make a donation, Trade with other hobbyists for other fish or aquarium equipment	No	aquarism forums, Internet searches (google, blogs), Book consultation and specific literature, Outros amigos aquaristas	Fewer fish will be available for trade in the future due to excessive catch and loss of natural habitats	With fellow aquarists
553	2019-02-12 22:29:54	Hobbysta (ornamental fish breeder only)	Since my childhood	Beauty of animals and aquariums	Freshwater	Animal behavior	Raised in captivity	Less than 100 R$	Between 5 and 10 fish	2	Yes	Physical shops and petshops	No	No	Once every 10 days	No	No	Yes	I never fell apart	No	aquarism forums, Internet searches (google, blogs), External access, Consult specialized websites	More fish will be available for trade in the future due to cultivation	On the Internet
554	2019-02-12 22:31:20	Hobbysta (ornamental fish breeder only)	Since my childhood	Beauty of animals and aquariums	The two options	If the animal provides any function inside the aquarium	Raised in captivity	Between 100 and 500 R$	Between 20 and 50 fish	7	Yes	Physical shops and petshops, Online stores (free market, olx, aquarium store websites), Aquarism groups on Facebook, Buy directly from suppliers	No	No	Once every 15 days	Yes	Kept in the aquarium, You've given it to another aquarist	Yes	I make a donation, Trade with other hobbyists for other fish or aquarium equipment	Yes	aquarism forums, Internet searches (google, blogs), Trial and error, Book consultation and specific literature, Consult specialized websites	Fewer fish will be available for trade in the future due to excessive catch and loss of natural habitats	With fellow aquarists
555	2019-02-12 22:37:06	Hobbysta and Seller	Since my childhood	Beauty of animals and aquariums	Freshwater	Ease in caring for the animal	Raised in captivity	Between 100 and 500 R$	Between 500 and 1000 fish	4	No	Physical shops and petshops, Aquarism groups on Facebook, Buy directly from suppliers	No	No	Once a week	Yes	Kept in the aquarium	Yes	Sell	No	Trial and error, Book consultation and specific literature	More fish will be available for trade in the future due to cultivation	On the Internet
556	2019-02-12 22:41:05	Hobbysta and Seller	Since my childhood	Beauty of animals and aquariums, Behavior - are easy animals to care for, do not make noise	Freshwater	Origin of the animal, Animal behavior	Raised in captivity	Between 100 and 500 R$	Between 10 and 20 fish	6	No	Physical shops and petshops, Online stores (free market, olx, aquarium store websites), Aquarism groups on Facebook, Capture in nature (lakes, rivers, ocean)	Yes	Yes	Once a week	No	Kept in the aquarium	Yes	Sell, I make a donation, Trade with other hobbyists for other fish or aquarium equipment	Yes	aquarism forums, Internet searches (google, blogs), Trial and error, Amigos experientes	More fish will be available for trade in the future due to cultivation	With specialized professionals, With fellow aquarists
557	2019-02-12 22:44:34	Hobbysta (ornamental fish breeder only)	Between 5 and 10 years	Beauty of animals and aquariums	Freshwater	Aesthetics of the animal, Behavior of the animal, If the animal provides any function inside the aquarium	Raised in captivity	Less than 100 R$	Between 10 and 20 fish	3	No	Physical shops and petshops	No	No	Once a month	No	No	Yes	I make a donation	No	aquarism forums, Internet searches (google, blogs), Consult specialized websites	More fish will be available for trade in the future due to cultivation	With fellow aquarists
558	2019-02-12 22:45:36	Hobbysta (ornamental fish breeder only)	Less than 1 year ago	Beauty of animals and aquariums	Freshwater	Origin of the animal, Animal behavior	Raised in captivity	Less than 100 R$	Between 20 and 50 fish	10	Yes	Physical shops and petshops	No	Yes	More than once a week	Yes	Kept in the aquarium	Yes	I make a donation	No	aquarism forums, Courses, Internet searches (google, blogs), Consult specialized websites	More fish will be available for trade in the future due to cultivation	With specialized professionals, On the Internet, With fellow aquarists
559	2019-02-12 22:45:45	Hobbysta (ornamental fish breeder only)	Less than 1 year ago	Beauty of animals and aquariums	Freshwater	Aesthetics of the animal, Origin of the animal, Animal behavior	Raised in captivity	Less than 100 R$	Between 20 and 50 fish	15	No	Physical shops and petshops	No	No	Once every 15 days	No	Kept in the aquarium	Yes	I make a donation	No	aquarism forums, Internet searches (google, blogs), Trial and error, Consult specialized websites	More fish will be available for trade in the future due to cultivation	With specialized professionals, On the Internet, With fellow aquarists
560	2019-02-12 22:51:57	Hobbysta and Seller	Since my childhood	Beauty of animals and aquariums	Freshwater	Aesthetics of the animal	Raised in captivity	Between 500 and 1,000 R$	Between 20 and 50 fish	8	No	Aquarism groups on Facebook	No	No	Once a month	Yes	No	Yes	Trade with other hobbyists for other fish or aquarium equipment	No	Trial and error	More fish will be available for trade in the future due to cultivation	With fellow aquarists
561	2019-02-12 22:58:52	Hobbysta (ornamental fish breeder only)	Between 1 and 5 years	Beauty of animals and aquariums	Freshwater	Shop/seller recommendation, Aesthetics of the animal, Origin of the animal, Animal behavior	Raised in captivity	Less than 100 R$	Less than 5 fish	1	No	Physical shops and petshops	No	No	Once every 15 days	No	No	No	I make a donation	No	aquarism forums, Internet searches (google, blogs), Book consultation and specific literature, Consult specialized websites	More fish will be available for trade in the future due to cultivation
562	2019-02-12 22:59:00	Hobbysta (ornamental fish breeder only)	Between 1 and 5 years	Beauty of animals and aquariums	Freshwater	Animal price, Shop/seller recommendation, Aesthetics of the animal, If the animal provides any function inside the aquarium	Raised in captivity	Between 100 and 500 R$	Between 10 and 20 fish	10	No	Physical shops and petshops	Yes		Once a month	Yes	Kept in the aquarium	Yes	I never fell apart	No	aquarism forums, Internet searches (google, blogs), Trial and error	More fish will be available for trade in the future due to cultivation	With specialized professionals, On the Internet, With fellow aquarists
563	2019-02-12 23:01:41	Hobbysta (ornamental fish breeder only)	Between 1 and 5 years	Passion for fish and aquariums	Freshwater	Aesthetics of the animal, Behavior of the animal, If the animal provides any function inside the aquarium, Ease in caring for the animal	Raised in captivity	Less than 100 R$	Between 20 and 50 fish	4	No	Physical shops and petshops, Online stores (free market, olx, aquarium store websites)	No	Yes	Once a week	Yes	Kept in the aquarium	Yes	Sell, I make a donation, Trade with other hobbyists for other fish or aquarium equipment	No	Internet searches (google, blogs), Trial and error, Consult specialized websites	Fewer fish will be available for trade in the future due to excessive catch and loss of natural habitats	On the Internet, With fellow aquarists
564	2019-02-12 23:04:53	Hobbysta (ornamental fish breeder only)	Between 5 and 10 years	Beauty of animals and aquariums	Freshwater	Ease in caring for the animal	Raised in captivity	Less than 100 R$	Between 5 and 10 fish	1	No	Physical shops and petshops	Yes	No	Once a month	No	died	Yes	Sell	No	aquarism forums, Internet searches (google, blogs), Trial and error, Consult specialized websites	Fewer fish will be available for trade in the future due to excessive catch and loss of natural habitats	With specialized professionals
565	2019-02-12 23:14:41	Hobbysta (ornamental fish breeder only)	Between 1 and 5 years	Beauty of animals and aquariums	Freshwater	Animal behavior	Raised in captivity	Less than 100 R$	Between 20 and 50 fish	2	Yes	Physical shops and petshops	No	No	Once a week	Yes	Kept in the aquarium	Yes	I make a donation	No	aquarism forums, Internet searches (google, blogs), Trial and error, Consult specialized websites	More fish will be available for trade in the future due to cultivation	On the Internet, With fellow aquarists
566	2019-02-12 23:16:28	Hobbysta (ornamental fish breeder only)	More than 10 years ago	Beauty of animals and aquariums	The two options	Origin of the animal, Behavior of the animal, If the animal provides any function inside the aquarium	Raised in captivity	Between 500 and 1,000 R$	Between 20 and 50 fish	7	Yes	Physical shops and petshops, Buy directly from suppliers	No	No	Once a week	Yes	Kept in the aquarium	No	I make a donation	No	aquarism forums, Internet searches (google, blogs), Trial and error, Book consultation and specific literature, Consult specialized websites	More fish will be available for trade in the future due to cultivation	With specialized professionals
567	2019-02-12 23:29:21	Hobbysta (ornamental fish breeder only)	Since my childhood	Beauty of animals and aquariums	Freshwater	Aesthetics of the animal	Raised in captivity	Less than 100 R$	Between 5 and 10 fish	1	No	Physical shops and petshops	No	No	Once a month	No	Kept in the aquarium	Yes	I make a donation	No	Internet searches (google, blogs)	Fewer fish will be available for trade in the future due to excessive catch and loss of natural habitats	On the Internet
568	2019-02-12 23:29:50	Hobbysta (ornamental fish breeder only)	Between 1 and 5 years	Beauty of animals and aquariums	Freshwater	Aesthetics of the animal, Ease in caring for the animal	Raised in captivity	Less than 100 R$	Between 5 and 10 fish	3	Yes	Physical shops and petshops	No	No	Once every 15 days	Yes	Kept in the aquarium	Yes	I never fell apart	No	aquarism forums, Internet searches (google, blogs), Trial and error, Book consultation and specific literature, Consult specialized websites	Fewer fish will be available for trade in the future due to excessive catch and loss of natural habitats	On the Internet
569	2019-02-12 23:30:36	Hobbysta (ornamental fish breeder only)	Less than 1 year ago	Beauty of animals and aquariums	Freshwater	Animal behavior	Raised in captivity	Less than 100 R$	Between 10 and 20 fish	7	No	Physical shops and petshops, Aquarism groups on Facebook	No	No	Once a week	No	You've given it to another aquarist	No	I make a donation	No	aquarism forums, Internet searches (google, blogs), Trial and error, Consult specialized websites	More fish will be available for trade in the future due to cultivation	With fellow aquarists
570	2019-02-12 23:38:22	Hobbysta (ornamental fish breeder only)	Between 1 and 5 years	Beauty of animals and aquariums	Freshwater	Animal price, Aesthetics of the animal, Origin of the animal, Behavior of the animal, If the animal provides any function inside the aquarium, Ease in caring for the animal	Raised in captivity	Less than 100 R$	Between 10 and 20 fish	7	No	Physical shops and petshops	No	No	Once every 15 days	Yes	Kept in the aquarium, You've given it to another aquarist	No	Sell, I make a donation	No	aquarism forums, Internet searches (google, blogs), Trial and error, Consult specialized websites	Fewer fish will be available for trade in the future due to excessive catch and loss of natural habitats	With specialized professionals, On the Internet, With fellow aquarists
571	2019-02-12 23:51:31	Hobbysta (ornamental fish breeder only)	Between 1 and 5 years	Beauty of animals and aquariums	Freshwater	Aesthetics of the animal, Animal behavior	Raised in captivity	Less than 100 R$	Between 10 and 20 fish	7	Yes	Physical shops and petshops	No	No	Once a week	No	No	No	I make a donation	No	aquarism forums, Internet searches (google, blogs), Book consultation and specific literature, Consult specialized websites	More fish will be available for trade in the future due to cultivation	With fellow aquarists
572	2019-02-12 23:56:33	Hobbysta (ornamental fish breeder only)	Between 1 and 5 years	Behavior - are easy animals to care for, do not make noise	Freshwater	Compatibility with my aquarium and my fauna	Raised in captivity	Less than 100 R$	Between 5 and 10 fish	4	No	Physical shops and petshops	Yes	No	Once a month	Yes	Kept in the aquarium	Yes	I never fell apart	No	aquarism forums, Internet searches (google, blogs), Trial and error, Consult specialized websites	More fish will be available for trade in the future due to cultivation	With specialized professionals, On the Internet
573	2019-02-13 00:34:23	Hobbysta (ornamental fish breeder only)	Since my childhood	Beauty of animals and aquariums	The two options	Aesthetics of the animal, Origin of the animal, Behavior of the animal, If the animal provides any function inside the aquarium	Raised in captivity	Between 100 and 500 R$	Between 10 and 20 fish	7	No	Aquarism groups on Facebook, Buy directly from suppliers	No	No	More than once a week	Yes	You've given it to another aquarist, Swapped with another aquarist for another fish	Yes	I make a donation, Trade with other hobbyists for other fish or aquarium equipment	No	aquarism forums, Internet searches (google, blogs), Consult specialized websites	More fish will be available for trade in the future due to cultivation	On the Internet, With fellow aquarists
574	2019-02-13 00:42:25	Hobbysta (ornamental fish breeder only)	Between 1 and 5 years	Beauty of animals and aquariums	The two options	Ease in caring for the animal	Raised in captivity	Less than 100 R$	Between 10 and 20 fish	9	No	Physical shops and petshops, Online stores (free market, olx, aquarium store websites), Aquarism groups on Facebook, Buy directly from suppliers	No	No	Once every 15 days	Yes	Kept in the aquarium	No	I make a donation, Trade with other hobbyists for other fish or aquarium equipment	No	aquarism forums, Internet searches (google, blogs), Consult specialized websites	More fish will be available for trade in the future due to cultivation	On the Internet, With fellow aquarists
575	2019-02-13 01:05:35	Hobbysta (ornamental fish breeder only)	Between 1 and 5 years	Therapy/depression/anxiety/calm	Freshwater	Animal price, Origin of the animal, Behavior of the animal, If the animal provides any function inside the aquarium, Ease in caring for the animal	Raised in captivity	Less than 100 R$	Less than 5 fish	1	No	Physical shops and petshops	No	No	Once a week	Yes	Kept in the aquarium, Sold, You've given it to another aquarist	Yes	Sell, I make a donation, Trade with other hobbyists for other fish or aquarium equipment	No	aquarism forums, Internet searches (google, blogs), Trial and error, Book consultation and specific literature, Consult specialized websites	Fewer fish will be available for trade in the future due to excessive catch and loss of natural habitats	On the Internet, With fellow aquarists
576	2019-02-13 01:15:59	Hobbysta (ornamental fish breeder only)	Between 1 and 5 years	Passion for fish and aquariums	Freshwater	Aesthetics of the animal, Origin of the animal, Animal behavior	Raised in captivity	Between 500 and 1,000 R$	Between 5 and 10 fish	9	No	Physical shops and petshops, Online stores (free market, olx, aquarium store websites), Aquarism groups on Facebook	No	No	Once a week	No	No	Yes	Sell, Trade with other hobbyists for other fish or aquarium equipment	No	External access, Trial and error, Book consultation and specific literature, Consult specialized websites	More fish will be available for trade in the future due to cultivation	With specialized professionals
577	2019-02-13 01:31:16	Hobbysta (ornamental fish breeder only)	Between 5 and 10 years	Encouragement, recommendation or inheritance of friends or family	Freshwater	Animal behavior	Raised in captivity	Less than 100 R$	Less than 5 fish	2	No	Physical shops and petshops	No	No	Once a month	Yes	You've given it to another aquarist	Yes	Trade with other hobbyists for other fish or aquarium equipment	No	Trial and error	More fish will be available for trade in the future due to cultivation	With specialized professionals
578	2019-02-13 01:36:57	Hobbysta (ornamental fish breeder only)	Between 5 and 10 years	Beauty of animals and aquariums, Encouragement, recommendation or inheritance of friends or family	Freshwater	Aesthetics of the animal, Origin of the animal	Raised in captivity	Between 100 and 500 R$	Between 20 and 50 fish	8	No	Physical shops and petshops	No	No	Once a week	Yes	Kept in the aquarium	Yes	I make a donation	No	aquarism forums, Internet searches (google, blogs), Trial and error	More fish will be available for trade in the future due to cultivation	With specialized professionals, On the Internet
579	2019-02-13 02:31:29	Hobbysta (ornamental fish breeder only)	Between 5 and 10 years	Beauty of animals and aquariums	Freshwater	Animal price, Origin of the animal, Animal behavior	Raised in captivity	Between 100 and 500 R$	Between 10 and 20 fish	2	No	Physical shops and petshops	No	No	Once a week	No	No	No	I make a donation	No	aquarism forums, Internet searches (google, blogs), Trial and error	More fish will be available for trade in the future due to cultivation	On the Internet
580	2019-02-13 03:43:02	Hobbysta (ornamental fish breeder only)	Between 1 and 5 years	Beauty of animals and aquariums	Freshwater	Compatibility with my aquarium and my fauna	Raised in captivity	Between 100 and 500 R$	Between 20 and 50 fish	5	Yes	Physical shops and petshops	No	No	Once every 15 days	Yes	Kept in the aquarium	Yes	I never fell apart	No	aquarism forums, Internet searches (google, blogs), Consult specialized websites, Tenho uma conhecida que é super experiente e me ajuda muito, amigos hobbystas	More fish will be available for trade in the future due to cultivation	With specialized professionals, With fellow aquarists
581	2019-02-13 04:52:23	Hobbysta (ornamental fish breeder only)	Since my childhood	Beauty of animals and aquariums	Freshwater	Behavior of the animal, If the animal provides any function inside the aquarium, Ease in caring for the animal	Raised in captivity	Less than 100 R$	Between 10 and 20 fish	3	No	Physical shops and petshops	No	No	Once every 15 days	Yes	Kept in the aquarium, You've given it to another aquarist	No	I make a donation	No	aquarism forums, Internet searches (google, blogs), Trial and error, Book consultation and specific literature	More fish will be available for trade in the future due to cultivation
582	2019-02-13 05:47:56	Hobbysta (ornamental fish breeder only)	Between 1 and 5 years	Beauty of animals and aquariums	Freshwater	Animal behavior	Raised in captivity	Less than 100 R$	Between 20 and 50 fish	4	No	Physical shops and petshops	No	No	Once every 15 days	Yes	Kept in the aquarium	No	I make a donation	No	aquarism forums, Internet searches (google, blogs), Trial and error, Book consultation and specific literature, Consult specialized websites	Fewer fish will be available for trade in the future due to excessive catch and loss of natural habitats	On the Internet
583	2019-02-13 05:50:21	Hobbysta (ornamental fish breeder only)	Less than 1 year ago	Beauty of animals and aquariums	Freshwater	Origin of the animal	Raised in captivity	Less than 100 R$	Between 5 and 10 fish	2	No	Physical shops and petshops, Buy directly from suppliers	Yes	No	Once a week	No	Kept in the aquarium	No	I make a donation	No	aquarism forums, Internet searches (google, blogs), Consult specialized websites	More fish will be available for trade in the future due to cultivation	With fellow aquarists
584	2019-02-13 06:10:46	Hobbysta (ornamental fish breeder only)	Between 1 and 5 years	Beauty of animals and aquariums	Freshwater	Animal behavior	Wild caught in nature	I don't know	Between 10 and 20 fish	2	Yes	Physical shops and petshops	Yes	No	More than once a week	Yes	Sold	Yes	Sell, I make a donation, Trade with other hobbyists for other fish or aquarium equipment	No	aquarism forums, Internet searches (google, blogs), External access, Trial and error, Book consultation and specific literature, Consult specialized websites	Fewer fish will be available for trade in the future due to excessive catch and loss of natural habitats	With fellow aquarists, I treat myself
585	2019-02-13 06:35:58	Hobbysta (ornamental fish breeder only)	Since my childhood	Beauty of animals and aquariums	Freshwater	Aesthetics of the animal, Animal behavior	Raised in captivity	Less than 100 R$	Between 10 and 20 fish	7	No	Physical shops and petshops	No	No	Once a month	Yes	You've given it to another aquarist, Swapped with another aquarist for another fish	Yes	I make a donation, Trade with other hobbyists for other fish or aquarium equipment	No	aquarism forums, Internet searches (google, blogs), Trial and error, Consult specialized websites	Fewer fish will be available for trade in the future due to excessive catch and loss of natural habitats	On the Internet, With fellow aquarists
586	2019-02-13 06:49:42	Hobbysta (ornamental fish breeder only)	Between 1 and 5 years	Beauty of animals and aquariums	Freshwater	Shop/seller recommendation	Raised in captivity	Less than 100 R$	Less than 5 fish	3	Yes	Physical shops and petshops	No	No	Once every 15 days	No	No	Yes	I make a donation	No	aquarism forums, Internet searches (google, blogs), Book consultation and specific literature, Consult specialized websites	Fewer fish will be available for trade in the future due to excessive catch and loss of natural habitats	With fellow aquarists
587	2019-02-13 06:59:19	Hobbysta (ornamental fish breeder only)	Since my childhood	Beauty of animals and aquariums	The two options	Origin of the animal, Behavior of the animal, If the animal provides any function inside the aquarium	Raised in captivity	Between 500 and 1,000 R$	Between 10 and 20 fish	12	Yes	Physical shops and petshops, Aquarism groups on Facebook, Buy directly from suppliers	No	Yes	More than once a week	Yes	Kept in the aquarium, You've given it to another aquarist	No	I make a donation	No	30 anos de experiência na prática	More fish will be available for trade in the future due to cultivation	With specialized professionals
588	2019-02-13 07:07:13	Hobbysta (ornamental fish breeder only)	Between 1 and 5 years	Beauty of animals and aquariums	Freshwater	Aesthetics of the animal, Behavior of the animal, If the animal provides any function inside the aquarium	Raised in captivity	Less than 100 R$	Between 20 and 50 fish	12	No	Physical shops and petshops	No	No	Once a week	Yes	You've given it to another aquarist	Yes	Sell, I make a donation, Trade with other hobbyists for other fish or aquarium equipment	No	aquarism forums, Internet searches (google, blogs), Trial and error, Book consultation and specific literature, Consult specialized websites	More fish will be available for trade in the future due to cultivation	With specialized professionals, With fellow aquarists
589	2019-02-13 07:11:39	Hobbysta (ornamental fish breeder only)	Since my childhood	Beauty of animals and aquariums, Therapy/depression/anxiety/calm	Freshwater	Aesthetics of the animal, Behavior of the animal, If the animal provides any function inside the aquarium, Ease in caring for the animal	Raised in captivity	Less than 100 R$	Between 10 and 20 fish	6	Yes	Physical shops and petshops	No	No	Once a month	No	Kept in the aquarium	Yes	Sell, I make a donation, Trade with other hobbyists for other fish or aquarium equipment	No	aquarism forums, Internet searches (google, blogs), Trial and error, Book consultation and specific literature, Consult specialized websites	More fish will be available for trade in the future due to cultivation	On the Internet, With fellow aquarists
590	2019-02-13 07:19:08	Hobbysta (ornamental fish breeder only)	Between 1 and 5 years	Beauty of animals and aquariums	Freshwater	Origin of the animal, Behavior of the animal, If the animal provides any function inside the aquarium	Raised in captivity	Less than 100 R$	Between 5 and 10 fish	0	No	Physical shops and petshops	Yes	No	Once a week	No	No	No	I never fell apart	No	aquarism forums, Internet searches (google, blogs)	Fewer fish will be available for trade in the future due to excessive catch and loss of natural habitats	With specialized professionals, With fellow aquarists
591	2019-02-13 07:29:55	Hobbysta (ornamental fish breeder only)	Between 5 and 10 years	Beauty of animals and aquariums	Freshwater	Origin of the animal, Animal behavior	Raised in captivity	Less than 100 R$	Between 5 and 10 fish	4	No	Physical shops and petshops, Aquarism groups on Facebook, Buy directly from suppliers	No	No	Once every 15 days	No	No	No	I make a donation, Trade with other hobbyists for other fish or aquarium equipment	No	aquarism forums, Internet searches (google, blogs), Trial and error, Consult specialized websites	More fish will be available for trade in the future due to cultivation	On the Internet
592	2019-02-13 07:46:06	Hobbysta (ornamental fish breeder only)	More than 10 years ago	Beauty of animals and aquariums	Freshwater	Aesthetics of the animal	Raised in captivity	Less than 100 R$	Between 20 and 50 fish	9	No	Physical shops and petshops, Online stores (free market, olx, aquarium store websites), Buy directly from suppliers	No	No	Once every 15 days	No	No	Yes	Sell, I make a donation, Trade with other hobbyists for other fish or aquarium equipment	No	aquarism forums, Courses, Internet searches (google, blogs), Trial and error, Consult specialized websites	More fish will be available for trade in the future due to cultivation	On the Internet, With fellow aquarists
593	2019-02-13 08:00:47	Hobbysta (ornamental fish breeder only)	More than 10 years ago	Beauty of animals and aquariums	Freshwater	Animal behavior	Raised in captivity	Less than 100 R$	Between 5 and 10 fish	4	No	Physical shops and petshops	No	No	Once a month	Yes	Kept in the aquarium	Yes	I make a donation	No	Trial and error	More fish will be available for trade in the future due to cultivation	On the Internet
594	2019-02-13 08:02:11	Hobbysta (ornamental fish breeder only)	Between 5 and 10 years	Beauty of animals and aquariums	Freshwater	Origin of the animal, Animal behavior	Raised in captivity	Less than 100 R$	Between 5 and 10 fish	4	No	Physical shops and petshops, Aquarism groups on Facebook	No	No	Once every 15 days	No	No	Yes	Sell, Trade with other hobbyists for other fish or aquarium equipment	No	aquarism forums, Internet searches (google, blogs), Trial and error, Book consultation and specific literature, Consult specialized websites	Fewer fish will be available for trade in the future due to excessive catch and loss of natural habitats	With specialized professionals, On the Internet
595	2019-02-13 08:28:23	Hobbysta (ornamental fish breeder only)	Between 5 and 10 years	Beauty of animals and aquariums	Freshwater	Aesthetics of the animal, Behavior of the animal, If the animal provides any function inside the aquarium, Ease in caring for the animal	Raised in captivity	Between 100 and 500 R$	Between 20 and 50 fish	4	No	Physical shops and petshops	Yes	No	Once every 15 days	Yes	Kept in the aquarium, You've given it to another aquarist, Swapped with another aquarist for another fish, Troca de alimento com a loja	Yes	Trade with other hobbyists for other fish or aquarium equipment	No	Internet searches (google, blogs), Book consultation and specific literature, Consult specialized websites	More fish will be available for trade in the future due to cultivation	With specialized professionals
596	2019-02-13 08:46:49	Hobbysta (ornamental fish breeder only)	Since my childhood	Encouragement, recommendation or inheritance of friends or family	Freshwater	Aesthetics of the animal, Behavior of the animal, If the animal provides any function inside the aquarium	Raised in captivity	Between 100 and 500 R$	Entre 100 e 500 peixes	0	No	Physical shops and petshops, Online stores (free market, olx, aquarium store websites), Aquarism groups on Facebook	Yes	No	Once every 15 days	Yes	Kept in the aquarium, You've given it to another aquarist	Yes	I make a donation, Trade with other hobbyists for other fish or aquarium equipment	No	aquarism forums, Internet searches (google, blogs), Trial and error, Book consultation and specific literature, Consult specialized websites	Fewer fish will be available for trade in the future due to excessive catch and loss of natural habitats	With specialized professionals, On the Internet, With fellow aquarists
597	2019-02-13 08:59:42	Hobbysta (ornamental fish breeder only)	Between 1 and 5 years	Beauty of animals and aquariums	Freshwater	Animal behavior	Raised in captivity	Less than 100 R$	Between 5 and 10 fish	4	No	Physical shops and petshops	No	No	Once a week	Yes	Swapped with another aquarist for another fish	Yes	Trade with other hobbyists for other fish or aquarium equipment	No	Internet searches (google, blogs), Trial and error	More fish will be available for trade in the future due to cultivation	On the Internet
598	2019-02-13 09:07:09	Hobbysta and Seller	Between 5 and 10 years	Beauty of animals and aquariums	Freshwater	Aesthetics of the animal	Wild caught in nature	Less than 100 R$	Between 5 and 10 fish	1	Yes	Physical shops and petshops	No	No	Once a week	Yes	Kept in the aquarium	Yes	I make a donation	Yes	Book consultation and specific literature	Fewer fish will be available for trade in the future due to excessive catch and loss of natural habitats	On the Internet
599	2019-02-13 09:14:57	Hobbysta (ornamental fish breeder only)	More than 10 years ago	Beauty of animals and aquariums	Freshwater	If the animal provides any function inside the aquarium	Raised in captivity	Less than 100 R$	Between 5 and 10 fish	4	No	Physical shops and petshops	No	No	Once a month	Yes	Kept in the aquarium	No	I make a donation	No	Trial and error	More fish will be available for trade in the future due to cultivation	With specialized professionals
600	2019-02-13 09:23:34	Hobbysta (ornamental fish breeder only)	Between 1 and 5 years	Passion for fish and aquariums	Freshwater	Animal price, Aesthetics of the animal, Animal behavior	Raised in captivity	Less than 100 R$	Between 10 and 20 fish	8	Yes	Physical shops and petshops	Yes	No	Once a week	Yes	Kept in the aquarium	Yes	Sell, I make a donation, Trade with other hobbyists for other fish or aquarium equipment	No	Internet searches (google, blogs), Trial and error, Consult specialized websites	More fish will be available for trade in the future due to cultivation	On the Internet, With fellow aquarists
601	2019-02-13 09:34:21	Hobbysta (ornamental fish breeder only)	Between 1 and 5 years	Beauty of animals and aquariums	Freshwater	Animal behavior	Raised in captivity	Less than 100 R$	Between 20 and 50 fish	5	No	Physical shops and petshops	No	Yes	Once every 15 days	Yes	Kept in the aquarium	Yes	I make a donation	No	aquarism forums, Internet searches (google, blogs), Consult specialized websites	More fish will be available for trade in the future due to cultivation	On the Internet, With fellow aquarists
602	2019-02-13 09:59:54	Hobbysta (ornamental fish breeder only)	Between 5 and 10 years	Beauty of animals and aquariums, Encouragement, recommendation or inheritance of friends or family	Freshwater	Aesthetics of the animal, Origin of the animal	Raised in captivity	Between 100 and 500 R$	Between 5 and 10 fish	2	No	Physical shops and petshops	Yes	No	Once a week	Yes	Sold, You've given it to another aquarist	Yes	I make a donation	Yes	aquarism forums, Internet searches (google, blogs)	More fish will be available for trade in the future due to cultivation	With specialized professionals
603	2019-02-13 10:11:18	Hobbysta (ornamental fish breeder only)	More than 10 years ago	Beauty of animals and aquariums	Freshwater	Origin of the animal	Raised in captivity	Between 100 and 500 R$	Between 20 and 50 fish	1	No	Buy directly from suppliers	No	No	Once a week	Yes	Sold, You've given it to another aquarist, Swapped with another aquarist for another fish	Yes	Sell, Trade with other hobbyists for other fish or aquarium equipment	No	aquarism forums, Internet searches (google, blogs), Trial and error, Consult specialized websites	More fish will be available for trade in the future due to cultivation	With specialized professionals, With fellow aquarists
604	2019-02-13 10:34:41	Hobbysta (ornamental fish breeder only)	Less than 1 year ago	Beauty of animals and aquariums	Freshwater	Origin of the animal	Raised in captivity	Between 100 and 500 R$	Between 20 and 50 fish	12	No	Physical shops and petshops	No	No	Once every 15 days	No	No	Yes	I never fell apart	No	Internet searches (google, blogs), Trial and error	More fish will be available for trade in the future due to cultivation	With specialized professionals, On the Internet
605	2019-02-13 10:41:08	Hobbysta and Seller	Between 1 and 5 years	Beauty of animals and aquariums	Freshwater	Origin of the animal, Behavior of the animal, If the animal provides any function inside the aquarium	Raised in captivity	Between 100 and 500 R$	Between 20 and 50 fish	24	No	Physical shops and petshops, Online stores (free market, olx, aquarium store websites), Aquarism groups on Facebook, Buy directly from suppliers	No	No	Once every 15 days	Yes	Kept in the aquarium, Sold, You've given it to another aquarist, Swapped with another aquarist for another fish	Yes	Sell, I make a donation, Trade with other hobbyists for other fish or aquarium equipment	No	aquarism forums, Internet searches (google, blogs), Consult specialized websites, Amigo	More fish will be available for trade in the future due to cultivation	On the Internet, With fellow aquarists
606	2019-02-13 10:50:13	Hobbysta (ornamental fish breeder only)	Since my childhood	Beauty of animals and aquariums, Behavior - are easy animals to care for, do not make noise	Freshwater	Animal price, Aesthetics of the animal, If the animal provides any function inside the aquarium, Ease in caring for the animal	Raised in captivity	Less than 100 R$	Between 5 and 10 fish	4	No	Physical shops and petshops	No	No	Once every 15 days	Yes	Kept in the aquarium	No	I never fell apart	No	aquarism forums, Internet searches (google, blogs), External access, Trial and error, Consult specialized websites	More fish will be available for trade in the future due to cultivation
607	2019-02-13 11:00:37	Hobbysta (ornamental fish breeder only)	Between 1 and 5 years	Beauty of animals and aquariums	Freshwater	Aesthetics of the animal	Raised in captivity	Between 100 and 500 R$	Between 20 and 50 fish	5	Yes	Physical shops and petshops	Yes	No	Once a week	Yes	Kept in the aquarium	Yes	I make a donation	No	aquarism forums, Internet searches (google, blogs), Trial and error, Book consultation and specific literature, Consult specialized websites	More fish will be available for trade in the future due to cultivation	With specialized professionals, On the Internet, With fellow aquarists
608	2019-02-13 11:18:33	Hobbysta (ornamental fish breeder only)	Less than 1 year ago	Therapy/depression/anxiety/calm	Freshwater	Compatibility with my aquarium and my fauna	Raised in captivity	Less than 100 R$	Less than 5 fish	1	No	Physical shops and petshops	Yes	No	Once a week	No	No	Yes	I make a donation	No	aquarism forums, Internet searches (google, blogs), Trial and error, Consult specialized websites	More fish will be available for trade in the future due to cultivation	On the Internet, With fellow aquarists
609	2019-02-13 11:29:36	Hobbysta (ornamental fish breeder only)	Less than 1 year ago	Beauty of animals and aquariums	Marine	Aesthetics of the animal, Animal behavior	Raised in captivity	Between 100 and 500 R$	Between 5 and 10 fish	4	Yes	Physical shops and petshops	No	No	Once a week	No	No	No	I make a donation	No	aquarism forums, Internet searches (google, blogs)	More fish will be available for trade in the future due to cultivation	On the Internet, With fellow aquarists
610	2019-02-13 12:18:35	Hobbysta (ornamental fish breeder only)	More than 10 years ago	Beauty of animals and aquariums	Freshwater	Animal behavior	Raised in captivity	Less than 100 R$	Between 10 and 20 fish	5	No	Physical shops and petshops	No	No	More than once a week	Yes	You've given it to another aquarist, Swapped with another aquarist for another fish	Yes	I make a donation, Trade with other hobbyists for other fish or aquarium equipment	No	aquarism forums, Internet searches (google, blogs), Consult specialized websites	More fish will be available for trade in the future due to cultivation	On the Internet, With fellow aquarists
611	2019-02-13 12:31:23	Hobbysta (ornamental fish breeder only)	Between 1 and 5 years	Beauty of animals and aquariums	Freshwater	Ease in caring for the animal	Raised in captivity	Less than 100 R$	Between 5 and 10 fish	3	Yes	Physical shops and petshops, Online stores (free market, olx, aquarium store websites)	No	No	Once a month	Yes	Kept in the aquarium	Yes	I make a donation	No	aquarism forums, Internet searches (google, blogs), Trial and error, Book consultation and specific literature	More fish will be available for trade in the future due to cultivation	With specialized professionals, On the Internet
612	2019-02-13 12:33:01	Hobbysta (ornamental fish breeder only)	Less than 1 year ago	Passion for fish and aquariums	Freshwater	Animal price	Raised in captivity	Less than 100 R$	Between 10 and 20 fish	5	No	Physical shops and petshops	No	No	Once every 15 days	Yes	Kept in the aquarium	Yes	Trade with other hobbyists for other fish or aquarium equipment	No	Trial and error	More fish will be available for trade in the future due to cultivation	On the Internet
613	2019-02-13 12:44:38	Hobbysta (ornamental fish breeder only)	Between 1 and 5 years	Beauty of animals and aquariums	Freshwater	Aesthetics of the animal, Behavior of the animal, If the animal provides any function inside the aquarium	Raised in captivity	Between 100 and 500 R$	Between 20 and 50 fish	8	No	Physical shops and petshops	Yes	No	Once a week	Yes	Kept in the aquarium, You've given it to another aquarist	Yes	I make a donation	No	aquarism forums, Internet searches (google, blogs)	More fish will be available for trade in the future due to cultivation	With specialized professionals, On the Internet, With fellow aquarists
614	2019-02-13 12:51:49	Hobbysta (ornamental fish breeder only)	Between 1 and 5 years	Beauty of animals and aquariums	Freshwater	Animal behavior	Raised in captivity	Between 100 and 500 R$	Between 10 and 20 fish	11	No	Physical shops and petshops	No	No	Once a month	No	No	Yes	Sell	No	aquarism forums, Internet searches (google, blogs)	More fish will be available for trade in the future due to cultivation	On the Internet, With fellow aquarists
615	2019-02-13 13:07:15	Hobbysta (ornamental fish breeder only)	Since my childhood	Therapy/depression/anxiety/calm	The two options	Aesthetics of the animal, If the animal provides any function inside the aquarium	Raised in captivity	Less than 100 R$	Between 20 and 50 fish	20	No	Physical shops and petshops, Online stores (free market, olx, aquarium store websites), Buy directly from suppliers	No	Yes	Once a week	Yes	Kept in the aquarium, Sold, You've given it to another aquarist, Swapped with another aquarist for another fish	Yes	Sell, I make a donation, Trade with other hobbyists for other fish or aquarium equipment	No	Trial and error	More fish will be available for trade in the future due to cultivation	With specialized professionals, On the Internet
616	2019-02-13 13:25:07	Hobbysta (ornamental fish breeder only)	Between 5 and 10 years	Beauty of animals and aquariums	Freshwater	Animal behavior	Raised in captivity	Less than 100 R$	Between 10 and 20 fish	1	No	Physical shops and petshops, Buy directly from suppliers	No	No	Once a month	Yes	Kept in the aquarium	No	I make a donation	No	aquarism forums, Internet searches (google, blogs), Trial and error, Consult specialized websites	More fish will be available for trade in the future due to cultivation	With specialized professionals
617	2019-02-13 13:35:20	Hobbysta and Seller	Since my childhood	Beauty of animals and aquariums	Freshwater	Animal price, Aesthetics of the animal, Origin of the animal, Animal behavior	Raised in captivity	Between 100 and 500 R$	Between 10 and 20 fish	4	No	Physical shops and petshops, Aquarism groups on Facebook, Buy directly from suppliers	No	No	Once a week	Yes	Swapped with another aquarist for another fish	No	Sell, I make a donation, Trade with other hobbyists for other fish or aquarium equipment	No	aquarism forums, Courses, Internet searches (google, blogs), External access, Consult specialized websites	More fish will be available for trade in the future due to cultivation
618	2019-02-13 13:38:49	Hobbysta (ornamental fish breeder only)	Between 5 and 10 years	Beauty of animals and aquariums, Behavior - are easy animals to care for, do not make noise	Freshwater	Aesthetics of the animal, Animal behavior	Raised in captivity	Less than 100 R$	Between 10 and 20 fish	1	Yes	Physical shops and petshops	No	No	Once every 15 days	Yes	Kept in the aquarium, Sold, You've given it to another aquarist, Swapped with another aquarist for another fish	Yes	Sell, I make a donation	No	aquarism forums, Internet searches (google, blogs), Book consultation and specific literature, Consult specialized websites	More fish will be available for trade in the future due to cultivation	On the Internet, With fellow aquarists
619	2019-02-13 13:41:32	Hobbysta (ornamental fish breeder only)	Less than 1 year ago	Beauty of animals and aquariums	Freshwater	Aesthetics of the animal, If the animal provides any function inside the aquarium, Ease in caring for the animal	Raised in captivity	Between 100 and 500 R$	Between 10 and 20 fish	5	No	Physical shops and petshops, Aquarism groups on Facebook	No	No	More than once a week	No	Swapped with another aquarist for another fish	Yes	I make a donation, Trade with other hobbyists for other fish or aquarium equipment	No	aquarism forums, Internet searches (google, blogs), Trial and error	Fewer fish will be available for trade in the future due to excessive catch and loss of natural habitats	With specialized professionals, On the Internet, With fellow aquarists
620	2019-02-13 13:45:14	Hobbysta (ornamental fish breeder only)	Less than 1 year ago	Beauty of animals and aquariums	Freshwater	Aesthetics of the animal, Animal behavior	Raised in captivity	Less than 100 R$	Between 10 and 20 fish	6	No	Physical shops and petshops, Buy directly from suppliers	No	No	More than once a week	Yes	Sold, You've given it to another aquarist, Swapped with another aquarist for another fish	Yes	Sell, Trade with other hobbyists for other fish or aquarium equipment	No	aquarism forums, Trial and error, Consult specialized websites	More fish will be available for trade in the future due to cultivation	On the Internet
621	2019-02-13 13:56:04	Hobbysta (ornamental fish breeder only)	Between 1 and 5 years	Beauty of animals and aquariums	Freshwater	Animal behavior	Raised in captivity	Between 100 and 500 R$	Between 20 and 50 fish	6	No	Physical shops and petshops	No	No	Once a week	No	No	Yes	I make a donation	No	Internet searches (google, blogs)	Fewer fish will be available for trade in the future due to excessive catch and loss of natural habitats	With fellow aquarists
622	2019-02-13 14:06:27	Hobbysta (ornamental fish breeder only)	Between 5 and 10 years	Beauty of animals and aquariums, Behavior - are easy animals to care for, do not make noise	The two options	Animal price, Shop/seller recommendation, Aesthetics of the animal, If the animal provides any function inside the aquarium, Ease in caring for the animal	Raised in captivity	Between 100 and 500 R$	Between 20 and 50 fish	8	No	Physical shops and petshops, Online stores (free market, olx, aquarium store websites), Buy directly from suppliers	No	No	Once a month	No	No	Yes	Trade with other hobbyists for other fish or aquarium equipment	No	Trial and error	More fish will be available for trade in the future due to cultivation	With fellow aquarists
623	2019-02-13 14:08:24	Hobbysta (ornamental fish breeder only)	More than 10 years ago	Beauty of animals and aquariums	Freshwater	Origin of the animal	Raised in captivity	Less than 100 R$	Between 20 and 50 fish	8	No	Physical shops and petshops	Yes	No	Once a month	Yes	Kept in the aquarium	No	I make a donation, Trade with other hobbyists for other fish or aquarium equipment	No	aquarism forums, Internet searches (google, blogs), Trial and error, Consult specialized websites	More fish will be available for trade in the future due to cultivation
624	2019-02-13 14:13:46	Hobbysta (ornamental fish breeder only)	More than 10 years ago	Beauty of animals and aquariums, Encouragement, recommendation or inheritance of friends or family	Freshwater	Animal price, Aesthetics of the animal, Behavior of the animal, If the animal provides any function inside the aquarium, Ease in caring for the animal	Raised in captivity	Less than 100 R$	Between 10 and 20 fish	12	No	Physical shops and petshops	No	No	Once every 15 days	Yes	Kept in the aquarium	Yes	Trade with other hobbyists for other fish or aquarium equipment	No	aquarism forums, Internet searches (google, blogs), External access, Consult specialized websites	More fish will be available for trade in the future due to cultivation	With specialized professionals
625	2019-02-13 15:05:44	Hobbysta (ornamental fish breeder only)	Between 5 and 10 years	Beauty of animals and aquariums	Freshwater	Aesthetics of the animal, Origin of the animal, Behavior of the animal, If the animal provides any function inside the aquarium	Raised in captivity	Between 100 and 500 R$	Between 20 and 50 fish	3	Yes	Physical shops and petshops, Online stores (free market, olx, aquarium store websites)	No	No	Once a week	Yes	Kept in the aquarium	Yes	Trade with other hobbyists for other fish or aquarium equipment	No	aquarism forums, Internet searches (google, blogs), Trial and error, Consult specialized websites	More fish will be available for trade in the future due to cultivation	On the Internet, With fellow aquarists
626	2019-02-13 15:10:39	Hobbysta (ornamental fish breeder only)	More than 10 years ago	Beauty of animals and aquariums	Freshwater	Aesthetics of the animal, Compatibility with my aquarium and my fauna	Raised in captivity	Less than 100 R$	Between 10 and 20 fish	7	No	Physical shops and petshops	No	No	Once every 15 days	Yes	Kept in the aquarium	Yes	Sell, I make a donation, Trade with other hobbyists for other fish or aquarium equipment	Yes	aquarism forums, Internet searches (google, blogs), External access, Trial and error, Book consultation and specific literature, Consult specialized websites	More fish will be available for trade in the future due to cultivation	With specialized professionals, On the Internet, With fellow aquarists
627	2019-02-13 15:35:40	Hobbysta (ornamental fish breeder only)	Between 5 and 10 years	Beauty of animals and aquariums	Marine	Animal price, Shop/seller recommendation, Origin of the animal	Raised in captivity	Between 100 and 500 R$	Between 20 and 50 fish	9	Yes	Online stores (free market, olx, aquarium store websites), Buy directly from suppliers	No	No	Once every 15 days	No	Swapped with another aquarist for another fish	Yes	Sell, Trade with other hobbyists for other fish or aquarium equipment	No	aquarism forums, Consult specialized websites	Fewer fish will be available for trade in the future due to excessive catch and loss of natural habitats	On the Internet, With fellow aquarists
628	2019-02-13 15:45:10	Hobbysta (ornamental fish breeder only)	Since my childhood	Beauty of animals and aquariums	The two options	Animal behavior	Raised in captivity	Less than 100 R$	Between 10 and 20 fish	5	No	Physical shops and petshops	No	No	Once a week	Yes	Sold, Swapped with another aquarist for another fish	Yes	Sell, Trade with other hobbyists for other fish or aquarium equipment	No	aquarism forums, Courses, Internet searches (google, blogs), Trial and error, Book consultation and specific literature, Consult specialized websites	More fish will be available for trade in the future due to cultivation	On the Internet, With fellow aquarists
629	2019-02-13 15:56:01	Hobbysta (ornamental fish breeder only)	Between 1 and 5 years	Don't like dogs/cats	Freshwater	Animal price, Aesthetics of the animal, Origin of the animal, Behavior of the animal, If the animal provides any function inside the aquarium	Raised in captivity	Between 100 and 500 R$	Between 20 and 50 fish	5	Yes	Physical shops and petshops, Online stores (free market, olx, aquarium store websites), Aquarism groups on Facebook	No	No	Once a week	No	Kept in the aquarium	Yes	I make a donation	No	aquarism forums	More fish will be available for trade in the future due to cultivation	With fellow aquarists
630	2019-02-13 16:00:57	Hobbysta (ornamental fish breeder only)	Less than 1 year ago	Beauty of animals and aquariums	Freshwater	Aesthetics of the animal, Ease in caring for the animal	Raised in captivity	Less than 100 R$	Between 10 and 20 fish	6	No	Physical shops and petshops	No		Once every 15 days	No	No	No	I make a donation	No	aquarism forums, Internet searches (google, blogs)	More fish will be available for trade in the future due to cultivation	With fellow aquarists
631	2019-02-13 16:03:12	Hobbysta (ornamental fish breeder only)	Between 5 and 10 years	Beauty of animals and aquariums	Freshwater	Origin of the animal	Raised in captivity	Less than 100 R$	Between 10 and 20 fish	4	No	Physical shops and petshops	No	No	Once a month	Yes	Kept in the aquarium	Yes	I make a donation	No	Consult specialized websites	More fish will be available for trade in the future due to cultivation	With fellow aquarists
632	2019-02-13 16:14:28	Hobbysta (ornamental fish breeder only)	Since my childhood	Beauty of animals and aquariums	Freshwater	Animal price, Aesthetics of the animal, Origin of the animal, Animal behavior, Ease in caring for the animal	Raised in captivity	Between 100 and 500 R$	Between 10 and 20 fish	21	Yes	Physical shops and petshops	Yes	Yes	Once a week	Yes	Kept in the aquarium	Yes	Sell, I make a donation	No	Trial and error, Book consultation and specific literature, Consult specialized websites	More fish will be available for trade in the future due to cultivation	With fellow aquarists
633	2019-02-13 16:14:55	Hobbysta and Seller	Between 5 and 10 years	Beauty of animals and aquariums	Freshwater	Set of all these criteria	Raised in captivity	Between 100 and 500 R$	more than a thousand	10	No	Buy directly from suppliers	Yes	Yes	Once a week	Yes	Sold	Yes	I never fell apart	No	Courses, Internet searches (google, blogs), Trial and error, Book consultation and specific literature, Consult specialized websites	More fish will be available for trade in the future due to cultivation	With fellow aquarists, I treat myself
634	2019-02-13 16:17:51	Hobbysta (ornamental fish breeder only)	Since my childhood	Beauty of animals and aquariums	Freshwater	Origin of the animal	Raised in captivity	Between 100 and 500 R$	Between 5 and 10 fish	1	No	Buy directly from suppliers	No	No	More than once a week	Yes	Swapped with another aquarist for another fish	Yes	Trade with other hobbyists for other fish or aquarium equipment	Yes	30 years of experience	More fish will be available for trade in the future due to cultivation	With fellow aquarists
635	2019-02-13 16:29:54	Hobbysta and Seller	Since my childhood	Beauty of animals and aquariums	The two options	Animal behavior	Raised in captivity	Less than 100 R$	Between 20 and 50 fish	5	Yes	Physical shops and petshops	No	No	Once every 15 days	Yes	Kept in the aquarium	Yes	I make a donation	No	Trial and error	More fish will be available for trade in the future due to cultivation	With specialized professionals
636	2019-02-13 16:33:46	Hobbysta (ornamental fish breeder only)	Between 1 and 5 years	Therapy/depression/anxiety/calm	Freshwater	Animal price, Aesthetics of the animal, Origin of the animal, Behavior of the animal, If the animal provides any function inside the aquarium	Raised in captivity	Less than 100 R$	Between 20 and 50 fish	10	Yes	Physical shops and petshops	No	No	Once every 15 days	Yes	Kept in the aquarium	Yes	I make a donation, Trade with other hobbyists for other fish or aquarium equipment	No	aquarism forums, Internet searches (google, blogs), Trial and error, Book consultation and specific literature, Consult specialized websites	Fewer fish will be available for trade in the future due to excessive catch and loss of natural habitats	With fellow aquarists
637	2019-02-13 16:40:18	Hobbysta (ornamental fish breeder only)	Between 1 and 5 years	Beauty of animals and aquariums	Freshwater	Shop/seller recommendation, Aesthetics of the animal, Origin of the animal, If the animal provides any function inside the aquarium	Raised in captivity	Less than 100 R$	Between 20 and 50 fish	4	Yes	Physical shops and petshops	Yes	No	Once a week	Yes	Kept in the aquarium, You've given it to another aquarist, Swapped with another aquarist for another fish	Yes	I make a donation, Trade with other hobbyists for other fish or aquarium equipment	No	aquarism forums, Internet searches (google, blogs), Trial and error, Book consultation and specific literature, Consult specialized websites, Amigos aquaristas	More fish will be available for trade in the future due to cultivation	On the Internet, With fellow aquarists
638	2019-02-13 16:45:23	Hobbysta (ornamental fish breeder only)	Less than 1 year ago	Beauty of animals and aquariums	Freshwater	Animal price, Aesthetics of the animal, Animal behavior, Ease in caring for the animal	Raised in captivity	Less than 100 R$	Between 10 and 20 fish	3	Yes	Physical shops and petshops	No	No	Once a month	Yes	Kept in the aquarium	Yes	I make a donation	No	aquarism forums, Internet searches (google, blogs)	More fish will be available for trade in the future due to cultivation	On the Internet, With fellow aquarists
639	2019-02-13 16:47:23	Hobbysta (ornamental fish breeder only)	Between 1 and 5 years	Beauty of animals and aquariums	Freshwater	Aesthetics of the animal	Raised in captivity	Between 100 and 500 R$	Between 5 and 10 fish	6	No	Physical shops and petshops, Aquarism groups on Facebook, Buy directly from suppliers	No	No	Once a week	Yes	were eaten by the other fish	Yes	Sell, Trade with other hobbyists for other fish or aquarium equipment	No	aquarism forums, Internet searches (google, blogs), Trial and error, Consult specialized websites	More fish will be available for trade in the future due to cultivation	On the Internet, With fellow aquarists
640	2019-02-13 16:51:32	Hobbysta (ornamental fish breeder only)	Between 1 and 5 years	Beauty of animals and aquariums	Freshwater	Aesthetics of the animal, If the animal provides any function inside the aquarium, Ease in caring for the animal	Raised in captivity	Less than 100 R$	Between 10 and 20 fish	3	Yes	Physical shops and petshops, Aquarism groups on Facebook	No	No	Once a month	Yes	Kept in the aquarium, You've given it to another aquarist	Yes	I make a donation, Trade with other hobbyists for other fish or aquarium equipment	No	aquarism forums, Internet searches (google, blogs), Trial and error	Fewer fish will be available for trade in the future due to excessive catch and loss of natural habitats	On the Internet, With fellow aquarists
641	2019-02-13 16:52:22	Hobbysta and Seller	Since my childhood	Beauty of animals and aquariums	Freshwater	Origin of the animal	Raised in captivity	Between 100 and 500 R$	Between 20 and 50 fish	13	No	Buy directly from suppliers	Yes	Yes	Once every 15 days	Yes	Sold, Swapped with another aquarist for another fish	Yes	Sell, I make a donation, Trade with other hobbyists for other fish or aquarium equipment, Eutanasia, animais irrecuperaveis	Yes	aquarism forums, Courses, Internet searches (google, blogs), Trial and error, Book consultation and specific literature, Consult specialized websites	More fish will be available for trade in the future due to cultivation	I treat myself
642	2019-02-13 16:58:17	Hobbysta (ornamental fish breeder only)	Between 1 and 5 years	Therapy/depression/anxiety/calm	Freshwater	Shop/seller recommendation, Aesthetics of the animal, Origin of the animal, Behavior of the animal, If the animal provides any function inside the aquarium	Raised in captivity	Between 100 and 500 R$	Between 20 and 50 fish	7	No	Physical shops and petshops	No	No	Once a month	Yes	You've given it to another aquarist	No	I make a donation, Trade with other hobbyists for other fish or aquarium equipment	No	aquarism forums, Trial and error, Book consultation and specific literature, Consult specialized websites	Fewer fish will be available for trade in the future due to excessive catch and loss of natural habitats	On the Internet, With fellow aquarists
643	2019-02-13 16:59:13	Hobbysta (ornamental fish breeder only)	Between 5 and 10 years	Beauty of animals and aquariums	Freshwater	Shop/seller recommendation, Aesthetics of the animal, Origin of the animal, Behavior of the animal, If the animal provides any function inside the aquarium	Raised in captivity	Less than 100 R$	Between 10 and 20 fish	3	Yes	Physical shops and petshops	Yes	No	Once a week	Yes	Kept in the aquarium	Yes	I make a donation, Trade with other hobbyists for other fish or aquarium equipment	No	aquarism forums, Internet searches (google, blogs), Trial and error, Book consultation and specific literature, Consult specialized websites	More fish will be available for trade in the future due to cultivation	With specialized professionals, On the Internet, With fellow aquarists
644	2019-02-13 17:02:45	Hobbysta (ornamental fish breeder only)	Between 1 and 5 years	Beauty of animals and aquariums	Freshwater	Origin of the animal, Behavior of the animal, If the animal provides any function inside the aquarium	Raised in captivity	Between 100 and 500 R$	Between 20 and 50 fish	7	Yes	Physical shops and petshops	Yes	No	Once a week	Yes	Kept in the aquarium	No	I make a donation	No	aquarism forums, Internet searches (google, blogs), Trial and error, Consult specialized websites	More fish will be available for trade in the future due to cultivation
645	2019-02-13 17:23:12	Hobbysta and Seller	Between 5 and 10 years	Beauty of animals and aquariums	Freshwater	Origin of the animal, Behavior of the animal, If the animal provides any function inside the aquarium, Ease in caring for the animal	Raised in captivity	Between 100 and 500 R$	Between 20 and 50 fish	11	No	Physical shops and petshops, Grupos de aquarismo no whatsapp	No	No	Once a month	Yes	Kept in the aquarium, Sold, You've given it to another aquarist, Swapped with another aquarist for another fish	No	Sell, I make a donation, Trade with other hobbyists for other fish or aquarium equipment	No	aquarism forums, Courses, Internet searches (google, blogs), Trial and error, Book consultation and specific literature, Consult specialized websites	More fish will be available for trade in the future due to cultivation	With specialized professionals, On the Internet, With fellow aquarists
646	2019-02-13 17:28:29	Hobbysta (ornamental fish breeder only)	More than 10 years ago	Beauty of animals and aquariums	Freshwater	Aesthetics of the animal, Origin of the animal, If the animal provides any function inside the aquarium	Indifferent	Between 100 and 500 R$	Between 5 and 10 fish	3	Yes	Physical shops and petshops, Online stores (free market, olx, aquarium store websites), Buy directly from suppliers, Capture in nature (lakes, rivers, ocean)	Yes	No	Every 6 months	Yes	Kept in the aquarium, You've given it to another aquarist, Swapped with another aquarist for another fish	Yes	Sell, I make a donation, Trade with other hobbyists for other fish or aquarium equipment	No	Internet searches (google, blogs), Trial and error, Book consultation and specific literature	More fish will be available for trade in the future due to cultivation	On the Internet, With fellow aquarists
647	2019-02-13 17:30:22	Hobbysta and Seller	Between 1 and 5 years	Commercial interest - in addition to creating, you sell ornamental fish	Freshwater	Aesthetics of the animal, If the animal provides any function inside the aquarium	Raised in captivity	Less than 100 R$	Between 10 and 20 fish	3	No	Physical shops and petshops	No	No	Once every 15 days	No	No	Yes	Sell, I make a donation	No	aquarism forums, Internet searches (google, blogs)	Fewer fish will be available for trade in the future due to excessive catch and loss of natural habitats	On the Internet
648	2019-02-13 17:31:59	Hobbysta (ornamental fish breeder only)	Between 5 and 10 years	Beauty of animals and aquariums	Freshwater	Origin of the animal, Animal behavior	Raised in captivity	Between 100 and 500 R$	Between 5 and 10 fish	5	No	Physical shops and petshops, Online stores (free market, olx, aquarium store websites)	No	No	Once every 15 days	No	No	No	I make a donation	No	aquarism forums	More fish will be available for trade in the future due to cultivation
649	2019-02-13 17:42:54	Hobbysta (ornamental fish breeder only)	Between 5 and 10 years	Beauty of animals and aquariums	Freshwater	Ease in caring for the animal	Raised in captivity	Between 100 and 500 R$	Between 20 and 50 fish	6	Yes	Physical shops and petshops	No	No	Once a month	Yes	You've given it to another aquarist, Swapped with another aquarist for another fish	Yes	I make a donation, Trade with other hobbyists for other fish or aquarium equipment	No	External access	More fish will be available for trade in the future due to cultivation	With fellow aquarists
650	2019-02-13 17:44:30	Hobbysta (ornamental fish breeder only)	Between 1 and 5 years	Beauty of animals and aquariums	Freshwater	Origin of the animal	Raised in captivity	Between 100 and 500 R$	Between 5 and 10 fish	3	No	Physical shops and petshops, Online stores (free market, olx, aquarium store websites)	Yes	No	More than once a week	No	No	Yes	I never fell apart	No	aquarism forums, Internet searches (google, blogs), Consult specialized websites	Fewer fish will be available for trade in the future due to excessive catch and loss of natural habitats	With specialized professionals, On the Internet
651	2019-02-13 18:07:30	Hobbysta (ornamental fish breeder only)	Between 1 and 5 years	Beauty of animals and aquariums	Freshwater	Aesthetics of the animal, Origin of the animal, Animal behavior	Raised in captivity	Between 100 and 500 R$	Between 20 and 50 fish	11	No	Physical shops and petshops	No	No	Once every 15 days	Yes	Kept in the aquarium, You've given it to another aquarist	Yes	Sell, I make a donation, Trade with other hobbyists for other fish or aquarium equipment	No	aquarism forums, Internet searches (google, blogs), Consult specialized websites	More fish will be available for trade in the future due to cultivation	On the Internet, With fellow aquarists
652	2019-02-13 18:10:02	Hobbysta and Seller	More than 10 years ago	Therapy/depression/anxiety/calm	Freshwater	Aesthetics of the animal, animal genetics, Compatibility with my aquarium and my fauna	Raised in captivity	Less than 100 R$	Entre 50 e 100 peixes	3	Yes	Aquarism groups on Facebook, Buy directly from suppliers	No	No	Once a month	Yes	Sold, You've given it to another aquarist, Swapped with another aquarist for another fish	Yes	Sell, I make a donation	No	aquarism forums, Internet searches (google, blogs), Consult specialized websites	More fish will be available for trade in the future due to cultivation
653	2019-02-13 18:46:50	Hobbysta (ornamental fish breeder only)	Between 1 and 5 years	Beauty of animals and aquariums	Freshwater	Origin of the animal	Raised in captivity	Between 100 and 500 R$	Between 20 and 50 fish	9	Yes	Physical shops and petshops	No	No	Once a month	Yes	Kept in the aquarium, You've given it to another aquarist	Yes	I make a donation, Trade with other hobbyists for other fish or aquarium equipment	No	aquarism forums, Internet searches (google, blogs), Book consultation and specific literature, Consult specialized websites	Fewer fish will be available for trade in the future due to excessive catch and loss of natural habitats	On the Internet, With fellow aquarists
654	2019-02-13 19:28:14	Hobbysta (ornamental fish breeder only)	Since my childhood	Encouragement, recommendation or inheritance of friends or family	Freshwater	Aesthetics of the animal, Animal behavior	Raised in captivity	Less than 100 R$	Between 10 and 20 fish	6	Yes	Physical shops and petshops, Online stores (free market, olx, aquarium store websites)	Yes	No	Once a week	No	No	Yes	Sell, I make a donation, Trade with other hobbyists for other fish or aquarium equipment	No	aquarism forums, Internet searches (google, blogs), Book consultation and specific literature, Consult specialized websites	More fish will be available for trade in the future due to cultivation	With specialized professionals, On the Internet, With fellow aquarists
655	2019-02-13 19:39:07	Hobbysta and Seller	Between 1 and 5 years	Therapy/depression/anxiety/calm	Freshwater	I look for the most exotic/complex animals	Raised in captivity	Between 100 and 500 R$	Entre 100 e 500 peixes	7	No	Physical shops and petshops	No	No	Once every 15 days	Yes	Kept in the aquarium, Sold, You've given it to another aquarist, Swapped with another aquarist for another fish	Yes	Sell, I make a donation, Trade with other hobbyists for other fish or aquarium equipment, Release in nature	No	Internet searches (google, blogs), Consult specialized websites, Grupos aquarista	More fish will be available for trade in the future due to cultivation	With specialized professionals, On the Internet, With fellow aquarists
656	2019-02-13 19:57:13	Hobbysta and Seller	Between 1 and 5 years	Beauty of animals and aquariums	The two options	If the animal provides any function inside the aquarium	Raised in captivity	Less than 100 R$	Between 20 and 50 fish	2	No	Online stores (free market, olx, aquarium store websites), Aquarism groups on Facebook	Yes	Yes	Once a week	Yes	Swapped with another aquarist for another fish	Yes	Sell, Trade with other hobbyists for other fish or aquarium equipment	No	Trial and error	More fish will be available for trade in the future due to cultivation	With fellow aquarists
657	2019-02-13 20:31:15	Hobbysta (ornamental fish breeder only)	More than 10 years ago	Beauty of animals and aquariums	Freshwater	Animal behavior	Raised in captivity	Between 100 and 500 R$	Between 10 and 20 fish	7	No	Physical shops and petshops	No	No	Once a week	No	No	Yes	Trade with other hobbyists for other fish or aquarium equipment	No	External access	More fish will be available for trade in the future due to cultivation	With specialized professionals
658	2019-02-13 20:46:23	Hobbysta (ornamental fish breeder only)	Between 1 and 5 years	Beauty of animals and aquariums	Freshwater	Compatibility with my aquarium and my fauna	Raised in captivity	Between 100 and 500 R$	Between 20 and 50 fish	2	No	Physical shops and petshops	No	No	Once a week	No	No	Yes	I make a donation, Trade with other hobbyists for other fish or aquarium equipment	No	Internet searches (google, blogs), Trial and error, Consult specialized websites	More fish will be available for trade in the future due to cultivation	With fellow aquarists
[truncated: 248 more rows]
